# Supplementary material for: Benzo‐Extended Cyclohepta[def]fluorene Derivatives with Very Low‐Lying Triplet States
Source: PubMed Central journal article supplement — Angew Chem Int Ed Engl. 2022 Apr 5;61(23):e202202170. doi: 10.1002/anie.202202170 (PMC9324097; doi:10.1002/anie.202202170), 2022-04-05
Supplement: ANIE-61-0-s004.pdf [file ANIE-61-0-s004.pdf]

## Supporting Information

### **Benzo-Extended Cyclohepta[*def*]fluorene Derivatives with Very Low-Lying Triplet States**

*F. Wu, J. Ma\*, F. Lombardi, Y. Fu, F. Liu, Z. Huang, R. Liu, H. Komber, D. I. Alexandropoulos, E. Dmitrieva, T. G. Lohr, N. Israel, A. A. Popov, J. Liu, L. Bogani\*, X. Feng\**

**Table of Contents**

|                                    |     |
|------------------------------------|-----|
| 1. Experimental Section            | S2  |
| 1.1 General Methods and Materials  | S2  |
| 1.2 Detailed Synthetic Procedures  | S3  |
| 2. X-ray Crystallographic Analysis | S11 |
| 3. Optical Properties              | S14 |
| 4. EPR Analysis                    | S16 |
| 5. DFT Calculation                 | S20 |
| 6. Mass and NMR Spectra            | S27 |
| 7. Appendix                        | S62 |
| 8. References                      | S76 |

## 1. Experimental Section

### 1.1 General Methods and Materials

Unless otherwise noted, commercially available starting materials, reagents, catalysts, and dry solvents were used without further purification. Reactions were performed using standard vacuum-line and Schlenk techniques. All starting materials were obtained from TCI, Sigma Aldrich, abcr, Alfa Aesar, Acros Organics, or Fluorochem. Catalysts were purchased from Strem. Column chromatography was performed on silica (SiO<sub>2</sub>, particle size 0.063-0.200 mm, purchased from VWR). Silica-coated aluminum sheets with a fluorescence indicator (TLC silica gel 60 F254, purchased from Merck KGaA) were used for thin layer chromatography.

NMR data were recorded both on a Bruker AV-II 300 spectrometer operating at 300 MHz for <sup>1</sup>H and 75 MHz for <sup>13</sup>C and on a Bruker Avance III 500 spectrometer operating at 500 MHz for <sup>1</sup>H and at 125 MHz for <sup>13</sup>C using standard Bruker pulse programs. The measurements were made at room temperature (296 K; AV-II 300) and at 30 °C (303 K, Avance III 500) if not otherwise stated. Chemical shifts ( $\delta$ ) are reported in ppm. Coupling constants ( $J$ ) are reported in Hz. Dichloromethane-d<sub>2</sub> ( $\delta$ (<sup>1</sup>H) = 5.32 ppm,  $\delta$ (<sup>13</sup>C) = 53.8 ppm) was used as solvent. The following abbreviations are used to describe peak patterns as appropriate: *s* = singlet, *d* = doublet, *t* = triplet, *q* = quartet, and *m* = multiplet. Dichloromethane-d<sub>2</sub> (99.9 atom % D) was purchased from Eurisotop.

High-resolution electrospray ionization mass spectrometry (HR-ESI-MS) was recorded with an Agilent 6538 Ultra High Definition (UHD) Accurate-Mass Q-TOF LC/MC system. Matrix-assisted laser desorption/ionization time-of-flight (MALDI-TOF) MS was recorded on a Bruker Autoflex Speed MALDI-TOF MS (Bruker Daltonics, Bremen, Germany). All of the samples, were prepared by mixing the analyte and the matrix, 1,8-dihydroxyanthracen-9(10H)-one (dithranol, purchased from Fluka Analytical, purity > 98%) or *trans*-2-[3-(4-tert-butylphenyl)-2-methyl-2-propenylidene]malononitrile (DCTB, purchased from Sigma Aldrich, purity > 99%) in the solid state.

UV-visible (UV-vis) spectra were measured on an Agilent Cary 5000 UV-VIS-NIR spectrophotometer by using 10 mm optical-path quartz cell at room temperature.

(1,1':2',1''-terphenyl)-2,6-dicarbaldehyde (**9**)<sup>[1]</sup>, 2-(4,4,5,5-tetramethyl-1,3,2-dioxaborolan-2-yl)isophthalaldehyde (**10**)<sup>[2]</sup>, 5-Bromochrysene (**13**)<sup>[3]</sup>, (3-bromonaphthalen-2-yl)boronic acid (**21**)<sup>[4]</sup> were synthesized through multi steps procedures.

## 1.2 Detailed Synthetic Procedures

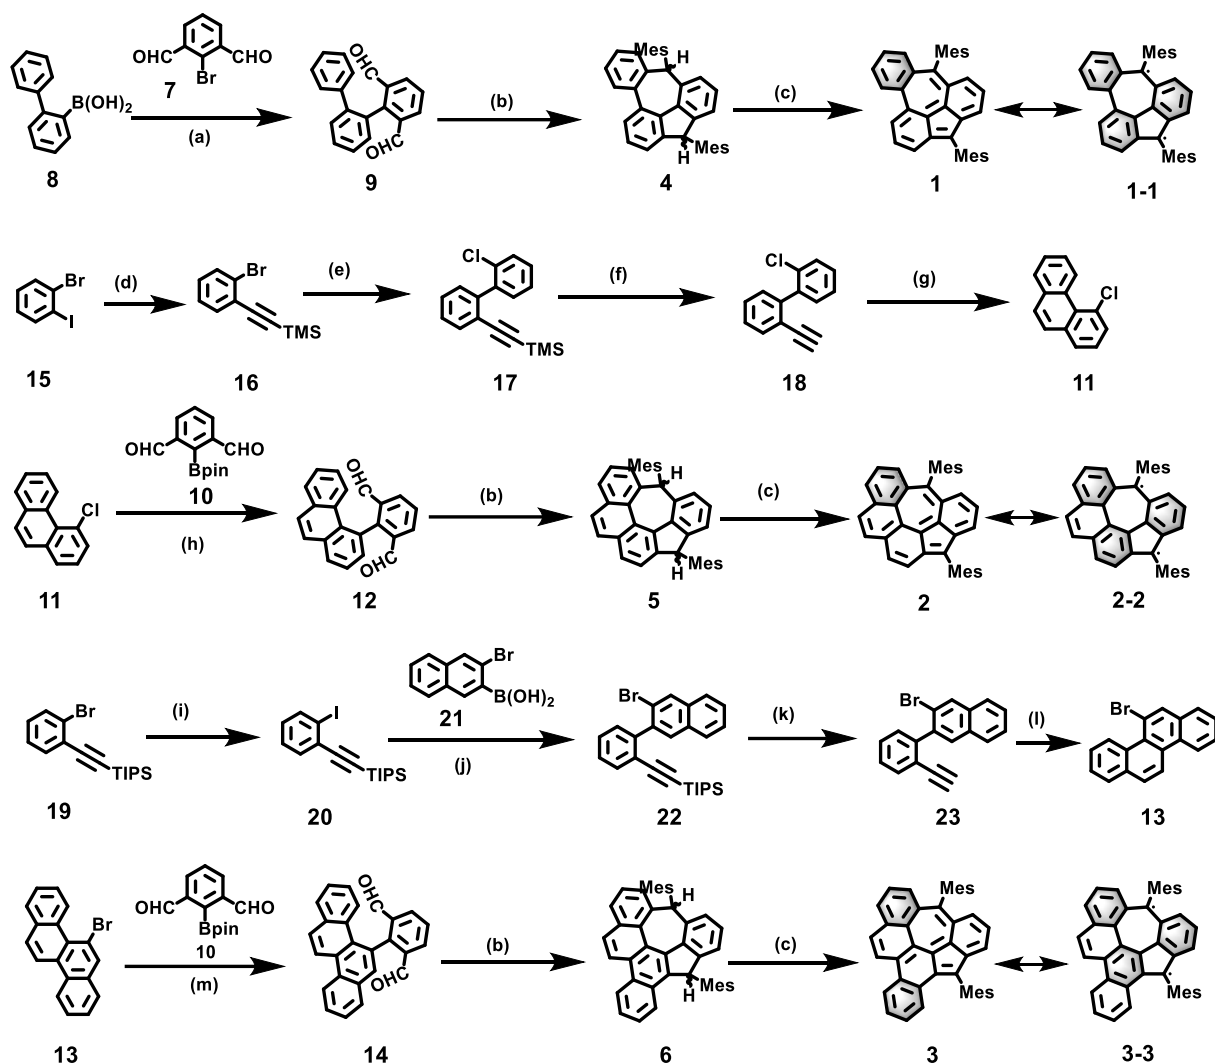

**Figure S1. Synthetic route to the diradicaloids 1, 2 and 3.** Reagents and conditions: (a) 2-bromoisophthalaldehyde,  $\text{Pd}(\text{PPh}_3)_4/\text{K}_2\text{CO}_3$ , dioxane/ $\text{H}_2\text{O}$ , 95 °C, 36 h, 81%; (b) (1) 2-mesitylmagnesium bromide, THF, rt, overnight (2)  $\text{BF}_3 \cdot \text{OEt}_2$ , DCM, rt, 40 min, **4**: 61%, **5**: 72%, **6**: 70%, yield in two steps; (c) 3 eq. DDQ, chlorobenzene for **1** or toluene for **2** and **3**, rt, 30 min; (d) ethynyltrimethylsilane,  $\text{Pd}(\text{PPh}_3)_2\text{Cl}_2$ , CuI, THF/ $\text{Et}_3\text{N}$ , rt, 3h, 95%; (e)  $\text{Pd}(\text{PPh}_3)_4$ ,  $\text{K}_2\text{CO}_3$ , Tol/ $\text{EtOH}/\text{H}_2\text{O}$ , 85 °C, overnight, 90%; (f)  $\text{K}_2\text{CO}_3$ , MeOH/THF, 40 °C, 1h, 98%; (g)  $\text{PtCl}_2$ , toluene, 110 °C, 24 h, 40%; (h)  $\text{Pd}(\text{OAc})_2$ , SPhos,  $\text{K}_3\text{PO}_4$ , Tol/ $\text{EtOH}/\text{H}_2\text{O}$ , 80 °C, 40 h, 34%; (i) n-BuLi,  $\text{Et}_2\text{O}$ , -78 to 0 °C, 1.2 h, then  $\text{ICH}_2\text{CH}_2\text{I}/\text{Et}_2\text{O}$ , -78 °C, 3 h, 82%; (j) (3-bromonaphthalen-2-yl)boronic acid **20**,  $\text{Pd}(\text{PPh}_3)_4$ ,  $\text{K}_2\text{CO}_3$ , THF/Ethanol/ $\text{H}_2\text{O}$ , 60 °C, 87%; (k) TBAF, THF, rt, 95%; (l)  $\text{PtCl}_2$ , toluene, 90 °C, 63%; (m)  $\text{Pd}_2(\text{dba})_3$ , SPhos,  $\text{K}_3\text{PO}_4$ , Tol/THF, 100 °C, 36 h, 70%.



### Synthesis of (1,1':2',1''-terphenyl)-2,6-dicarbaldehyde (**9**):

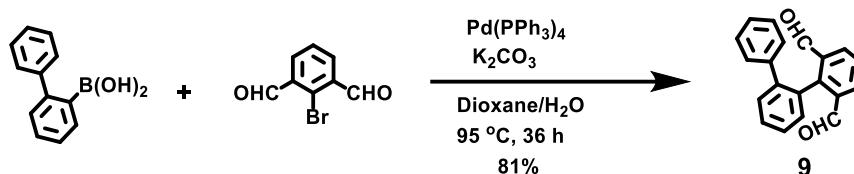

Compound (1,1':2',1''-terphenyl)-2,6-dicarbaldehyde (**9**) was synthesized according to our previous work.<sup>[1]</sup> A 500 mL round-bottom Schlenk flask was charged with commercially available 2-bromoisophthalaldehyde (6.0 g, 26.76 mmol), commercially available 2-biphenylboronic acid (12.8 g, 61.54 mmol), K<sub>2</sub>CO<sub>3</sub> (25.5 g, 184.62 mmol) and Pd(PPh<sub>3</sub>)<sub>4</sub> (0.6 g, 0.48 mmol) and was evacuated and charged with argon three times. Then degassed 1,4-dioxane (300 mL) and water (30 mL) were added and the reaction mixture was heated at 95 °C for 36 h under argon atmosphere. After cooling to room temperature, the mixture was poured into water and extracted with DCM three times. The organic layer was washed with brine and dried over anhydrous MgSO<sub>4</sub>. The solvent was removed under vacuum. The residue was purified by silica gel column chromatography (ethyl acetate: cyclohexane = 1:20 to 1:10) and washed with ethanol to give compound as a white solid (6.2 g, yield: 81 %). <sup>1</sup>H NMR (300 MHz, CD<sub>2</sub>Cl<sub>2</sub>) δ (ppm) = 9.81 (d, *J* = 0.8 Hz, 2H), 8.07 (d, *J* = 7.7 Hz, 2H), 7.66-7.49 (4H), 7.41 (ddd, *J* = 7.6, 1.5, 0.6 Hz, 1H), 7.18-7.13 (3H), 7.04-6.98 (2H). <sup>13</sup>C NMR (75MHz, CD<sub>2</sub>Cl<sub>2</sub>) δ 191.09, 147.95, 143.26, 140.41, 135.27, 132.95, 132.45, 131.74, 130.80, 130.13, 129.97, 128.83, 128.80, 127.93, 127.73. The spectroscopic data are consistent with those described in literature.<sup>[1]</sup> HR-ESI-MS (positive mode): calc. for [M+H]<sup>+</sup>: 287.1067, found for [M+H]<sup>+</sup>:287.1060 (deviation: -2.4 ppm).

### Synthesis of 1,5-dimesityl-1,5-dihydrobenzo[5,6]cyclohepta[1,2,3,4-def]fluorene (mixture of isomers) (**4**)

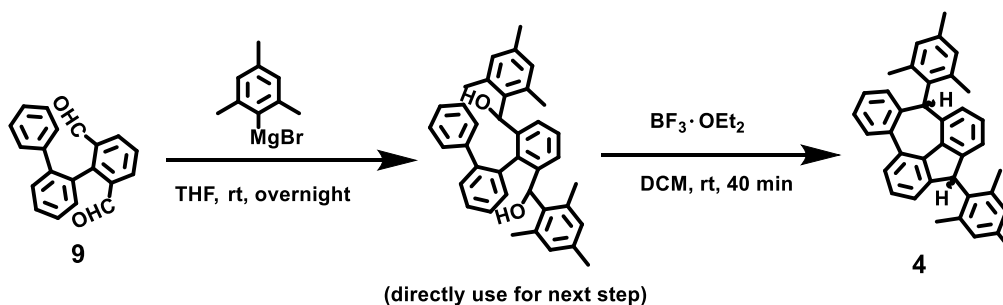

A 100 mL round-bottom Schlenk flask was charged with [1,1':2',1''-terphenyl]-2,6-dicarbaldehyde (**9**) (300 mg, 1.05 mmol) and was evacuated and charge with argon three times. Then degassed THF (30 mL) and mesitylmagnesium bromide (1M in diethylether, 8.38 mL, 8.38 mmol) were added and the reaction mixture was stirred at room temperature for overnight under argon atmosphere. Afterwards the reaction mixture was poured into water and extracted with DCM. The organic layer was washed by brine and dried over anhydrous MgSO<sub>4</sub>. The solvent was removed under vacuum and the residue was directly use for next step without further purify. The residue was dissolved in 20 ml anhydrous DCM and degassed by Argon for 30 min. Then boron trifluoride diethyl etherate (2 mL, 16.2 mmol) was added slowly at 0 °C. Then the ice bath was removed and the mixture was stirred at room temperature for another 40 min. Then the mixture was cooled to 0 °C again and carefully quenched with NaHCO<sub>3</sub> solution. Afterwards, the reaction mixture was extracted with DCM. The organic layer was washed by brine and dried over anhydrous MgSO<sub>4</sub>. The solvent was removed under vacuum and the residue was washed with MeOH to get the pale-yellow powder. R<sub>f</sub>: 0.22 (DCM: isohexane = 1:10). The crude product was further purified by recycle-GPC (GPC columns: JAIGEL-2HH + JAIGEL-1HH; column solvent: chloroform; flow rate: 5.0 mL/min; collecting fraction at *t* = 150 min-160 min) to give the title compound as a white solid (mixture of isomers, 312 mg, 61% yield in two steps). Detailed <sup>1</sup>H and <sup>13</sup>C NMR spectroscopic data of two isomers were reported in **Table S9**. HR-MALDI-TOF (matrix: DCTB): calc. [M]<sup>+</sup>: 490.2655, found for [M]<sup>+</sup>: 490.2644 (deviation: -2.2 ppm).

Synthesis of 1,5-dimesitylbenzo[5,6]cyclohepta[1,2,3,4-def]fluorene (**1**)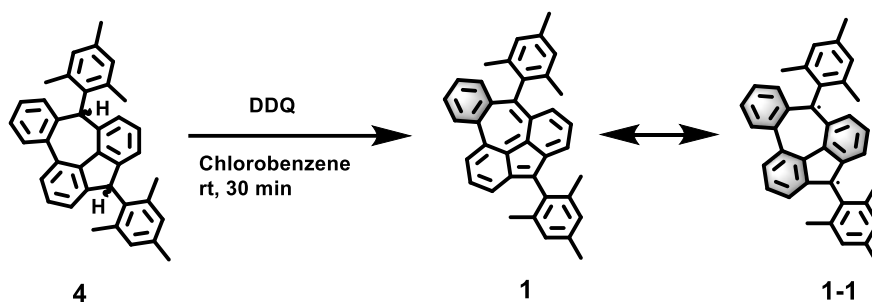

To a 10 ml Schlenk tube connected with a vacuum trap (as shown in the following Figure) was charged with compound **4** (20 mg, 0.04 mmol) and 2.5 mL anhydrous chlorobenzene. The mixture was bubbled with argon for 30 min, then a solution of DDQ (28 mg, 0.12 mmol) in 2.5 mL degassed anhydrous chlorobenzene was added dropwise. After stirring at room temperature for 10 min, start removing the solvent in-situ under reduced pressure (the reaction time was controlled in 30-40 min in total). Then the Schlenk flask was moved to a glove box. The residue was washed with dry, degassed n-heptane to give a dark black solid 20 mg, which was directly use for other characterization. HR-MALDI-TOF (matrix: DCTB): calc.  $[M]^+$ : 488.2499, found for  $[M]^+$ : 488.2490 (deviation: -1.8 ppm).

Note: We found that the solvent plays a role in the dehydrogenation to **1**. When anhydrous toluene (from Sigma-Aldrich) was used as the solvent, we mainly got the partially dehydrogenated byproduct of **1** according to the HR MALDI-TOF measurement (the color of the reaction mixture in toluene is reddish). We assumed that the diradicaloid **1** was formed under this reaction condition, but it is easy to abstract hydrogen from the methyl group in toluene due to the high reactivity. Therefore, we changed the solvent to anhydrous chlorobenzene (from Sigma-Aldrich) and the complete dehydrogenation was confirmed by HR-MALDI-TOF measurement (the color of the reaction mixture in chlorobenzene is dark green).

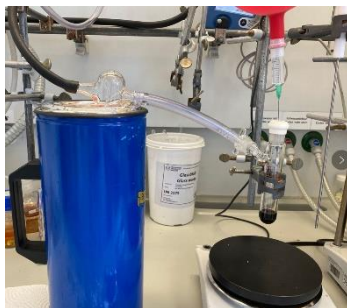

(Figure shows the reaction device: 10 mL Schlenk tube connected with a vacuum trap then connect to a manifold)

Synthesis of ((2-bromophenyl)ethynyl)trimethylsilane (**16**)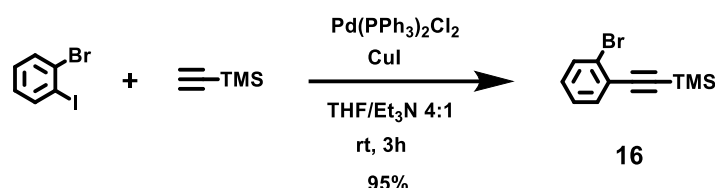

To an oven-dried 250 mL Schlenk flask was charged with bis(triphenylphosphine)palladium(II) dichloride (1.24 g, 1.77 mmol, 5 mol%) and copper(I) iodide (471.2 mg, 2.47 mmol, 7 mol%), degassed and refilled with argon three times; 80 ml THF after degassed with argon 30 min was added into the flask; then add 4.54 mL 1-bromo-2-iodobenzene (10 g, 35.35 mmol) and 5.38 mL ethynyltrimethylsilane (3.82g, 38.9 mmol) and 20 mL trimethylamine (Et<sub>3</sub>N). The reaction mixture was stirred at room temperature for 3 h. These reaction mixture was diluted in 200 mL dichloromethane (DCM) and washed with saturated ammonium chloride solution (3×100 mL) and dried over magnesium sulfate (MgSO<sub>4</sub>). The solvent was removed under reduced pressure and the residue was purified by column chromatography on silica (Iso-hexane) to afford the compound **16** as a yellow liquid (8.5 g, 95%)

<sup>1</sup>H NMR (300 MHz, CDCl<sub>3</sub>) δ 7.60 (dd, *J* = 8.0, 1.3 Hz, 1H), 7.52 (dd, *J* = 7.6, 1.8 Hz, 1H), 7.31-7.13 (2H), 0.31 (s, 9H). <sup>13</sup>C NMR (75 MHz, CDCl<sub>3</sub>) δ 133.73, 132.49, 129.69, 127.01, 125.90, 125.38, 103.17, 99.77, 0.01. HR-ESI-MS (positive mode): calc. for [M]<sup>+</sup>: 251.9970, found for [M]<sup>+</sup>:251.9958 (deviation: -4.8 ppm).

Synthesis of ((2'-chloro-[1,1'-biphenyl]-2-yl)ethynyl)trimethylsilane (**17**)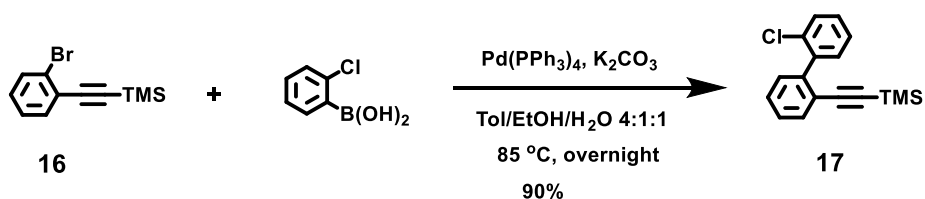

A 200 mL Schlenk flask was charged with (2-chlorophenyl)boronic acid (8.86 g, 56.63 mmol), Pd(PPh<sub>3</sub>)<sub>4</sub> (1.64 g, 1.42 mmol, 5 mol%) and K<sub>2</sub>CO<sub>3</sub> (15.6g, 113.3 mmol) and the flask was degassed and refilled with argon three times. To the reaction mixture was added a solution of **16** (7.17 g, 28.32 mmol) in toluene (40 mL), 10 mL EtOH and 10 mL H<sub>2</sub>O. The reaction mixture was stirred at 85 °C for overnight under argon. After cooling to room temperature, the reaction mixture was poured into water, extracted with ethyl acetate. The organic layer dried over magnesium sulfate. The solvent was removed under reduced pressure and the residue was purified by column chromatography on silica (iso-hexane) to give compound **17** as a yellow liquid (7.3 g, 90%). <sup>1</sup>H NMR (300 MHz, CD<sub>2</sub>Cl<sub>2</sub>) δ 7.54 (dd, *J* = 7.3, 2.2 Hz, 1H), 7.46 (m, 1H), 7.41-7.29 (6H), 0.03 (s, 9H). <sup>13</sup>C NMR (75MHz, CD<sub>2</sub>Cl<sub>2</sub>) δ 143.20, 140.06, 133.72, 132.37, 132.08, 130.19, 129.80, 129.46, 128.80, 128.24, 126.87, 123.49, 104.19, 98.53, -0.19. HR-ESI-MS (positive mode): calc. for [M]<sup>+</sup>: 284.0783, found for [M]<sup>+</sup>:284.0773 (deviation: -3.5 ppm).

Synthesis of 2-chloro-2'-ethynyl-1,1'-biphenyl (**18**)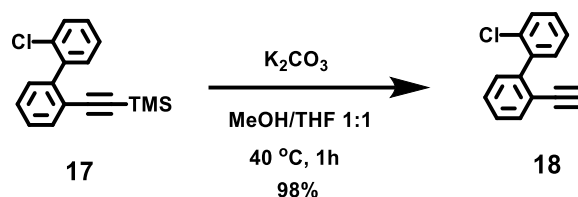

In a 250 mL round-bottom Schlenk flask compound **17** (6.07 g, 21.3 mmol),  $K_2CO_3$  (5.89 g, 42.6 mmol), MeOH (40 mL) and THF (40 mL) were added and degassed with argon for 15 minutes. Then the reaction mixture was stirred at 40 °C for 1 h. After cooling to room temperature, the reaction mixture was passed through a plug of silica with DCM as eluent. The solvent was removed under reduced pressure to yield the target compound **18** as a light-yellow liquid (4.45 g, 98%) then directly use for next step without further purify.

Synthesis of 4-chlorophenanthrene (**11**)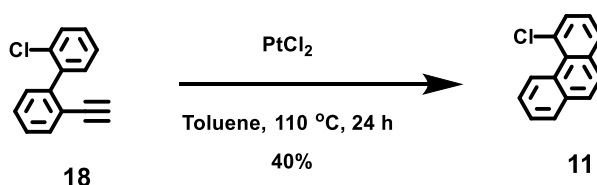

To an oven-dried 200 mL Schlenk flask was charged with **18** (3 g, 14.11 mmol) and platinum chloride (187 mg, 0.71 mmol, 5 mol%) and degassed and anhydrous toluene (100 mL). The reaction mixture was stirred at 110 °C for 24 h. After cooling to room temperature, the solvent was removed under reduced pressure and the residue was purified by silica gel column chromatography (Iso-hexane) to afford the compound **11** as a white and waxy solid (1.2 g, 40%).  $^1H$  NMR (300 MHz,  $CD_2Cl_2$ )  $\delta$  9.94 (m, 1H), 7.93 (m, 1H), 7.84 (d,  $J = 9.2$  Hz, 1H), 7.80-7.73 (3H), 7.72-7.64 (2H), 7.49 (m, 1H).  $^{13}C$  NMR (75 MHz,  $CD_2Cl_2$ )  $\delta$  135.72, 134.01, 132.05, 131.26, 130.15, 129.19, 128.89, 128.83, 127.80, 127.70, 127.66, 127.53, 126.90, 126.51. HR-ESI-MS (positive mode): calc. for  $[M]^+$ : 212.0387, found for  $[M]^+$ : 212.0391 (deviation: 1.9 ppm).

Synthesis of 2-(phenanthren-4-yl)isophthalaldehyde (**12**)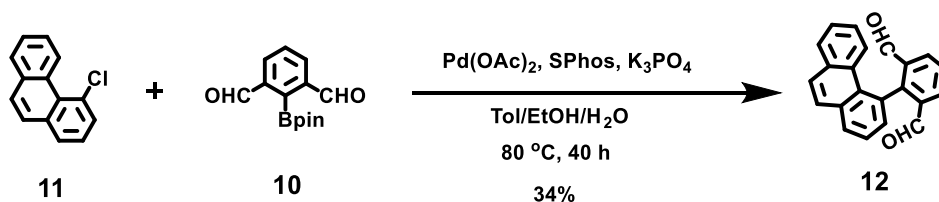

A 100 mL Schlenk flask was charged with **11** (1.45 g, 6.82 mmol), **10** (2.31 g, 8.86 mmol),  $Pd(OAc)_2$  (153 mg, 0.68 mmol, 10 mol%) and Sphos (560 mg, 1.36 mmol) and  $K_3PO_4$  (5.79 g, 27.3 mmol) and the flask was degassed and refilled with argon three times. Toluene (40 mL), 10 mL EtOH and 10 mL  $H_2O$  were added into the reaction mixture after degassed with argon for 30 min. The reaction mixture was stirred at 80 °C for 40 h under argon. After cooling to room temperature, the reaction mixture was poured into water, extracted with ethyl acetate. The organic layer dried over magnesium sulfate. The solvent was removed under reduced pressure and the residue was purified by column chromatography on silica (iso-hexane/DCM 1:1) to give compound **12** as a pale-yellow solid (720 mg, 34%).  $^1H$  NMR (300 MHz,  $CD_2Cl_2$ )  $\delta$  9.60 (d,  $J = 0.8$  Hz, 2H), 8.36 (d,  $J = 7.8$  Hz, 2H), 8.10 (dd,  $J = 7.9, 1.5$  Hz, 1H), 7.93-7.79 (4H), 7.70 (dd,  $J = 8.0, 7.2$  Hz, 1H), 7.51-7.37 (3H), 7.14 (ddd,  $J = 8.6, 7.0, 1.5$  Hz, 1H).  $^{13}C$  NMR (75 MHz,  $CD_2Cl_2$ )  $\delta$  191.13, 151.32, 135.13, 134.37, 134.07, 133.83, 132.84, 131.07, 130.66, 130.38, 130.22, 129.80, 129.35, 129.06, 128.07, 127.11, 126.94, 126.79, 126.18. HR-ESI-MS (negative mode): calc. for  $[M]^-$ : 310.0999, found for  $[M]^-$ : 310.0995 (deviation: -1.2 ppm).

## Synthesis of 1,5-dimesityl-1,5-dihydroindeno[6,7,1,2-ghij]pleiadene (5)

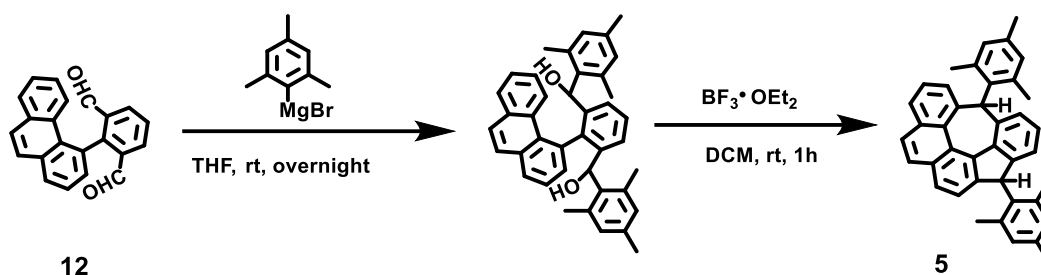

To a solution of compound **12** (100 mg, 0.32 mmol) in 15 mL of dry THF, mesitylmagnesium bromide (3.22 mL, 1M in diethylether, 3.22 mmol) was added under an argon atmosphere and the mixture was stirred at room temperature for overnight. The reaction mixture was then poured into 50 mL water and extracted by DCM. The organic layer was dried over anhydrous  $\text{MgSO}_4$  and the solvent was removed under reduced pressure. The residue was redissolved in 20 mL of dry DCM under argon atmosphere and 2 mL of  $\text{BF}_3 \cdot \text{OEt}_2$  was added at 0 °C. The mixture was stirred for 40 min at room temperature and quenched with water at 0 °C. Then the reaction mixture was washed with  $\text{NaHCO}_3$  solution (3 x 20 mL) and water (3 x 20 mL). The organic layer was dried over anhydrous  $\text{MgSO}_4$  and the solvent was removed under reduced pressure. The residue was washed by methanol to give crude product as a white solid.  $R_f$ : 0.21 (DCM: iso-hexane = 1:10). This crude product can be further purified by recycle-GPC (GPC columns: JAIGEL-2HH + JAIGEL-1HH; column solvent: chloroform; flow rate: 5.0 mL/min; collecting fraction at  $t = 75$  min-80 min) to give compound **5** as a white solid (mixture of isomers, 120 mg, 72% yield in two steps). Detailed  $^1\text{H}$  and  $^{13}\text{C}$  NMR spectroscopic data of two isomers were reported in **Table S10**. HR-MALDI-TOF (matrix: DCTB): calc.  $[\text{M}]^+$ : 514.2655, found for  $[\text{M}]^+$ : 514.2658 (deviation: -0.58 ppm).

## Synthesis of 1,5-dimesitylindeno[6,7,1,2-ghij]pleiadene (2)

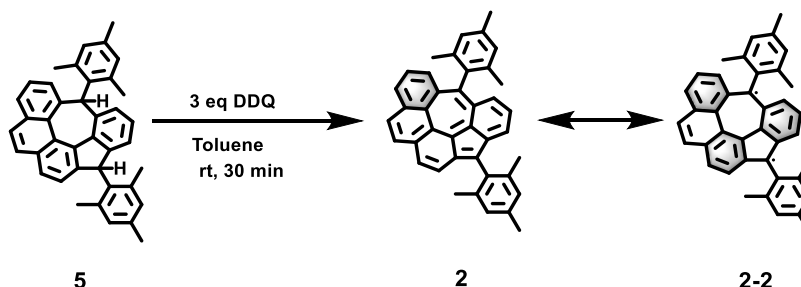

A 25 mL Schlenk flask was charged with compound **9** (50 mg, 0.097 mmol) and 5 mL anhydrous toluene. The mixture was bubbled with argon for 30 min, then a solution of DDQ (66 mg, 0.29 mmol) in 5 mL degassed anhydrous toluene was added dropwise. The reaction was monitored by HR-MALDI-TOF until completion. After stirring at room temperature for about 30 min, the reaction mixture was poured into a Bio-beads SX12 column and eluent with degassed anhydrous toluene under argon (as shown in the following Figure/Left) to remove most of the unreacted DDQ and its reduction side-product. The first brown color fraction was collected in a dry 100 mL single-neck round bottle with bubbling of argon. And the solvent was removed under reduced pressure (as shown in the following Figure/Right). Then the round bottle was transferred to a glove box. The residue was washed with dry, degassed n-heptane to give 20 mg compound **2** as a dark black solid. HR-MALDI-TOF (matrix: DCTB): calc.  $[\text{M}]^+$ : 512.2499, found for  $[\text{M}]^+$ : 512.2508 (deviation: 1.8 ppm).

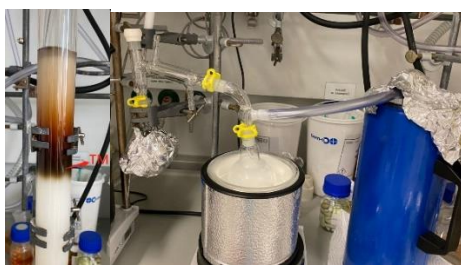

(Figure shows operation of Bio-beads SX12 column chromatography then collecting the first fraction then remove the eluent solvent (toluene) by distillation under reduced pressure at room temperature)

### Synthesis of 2-(chrysen-5-yl)isophthalaldehyde (**14**)

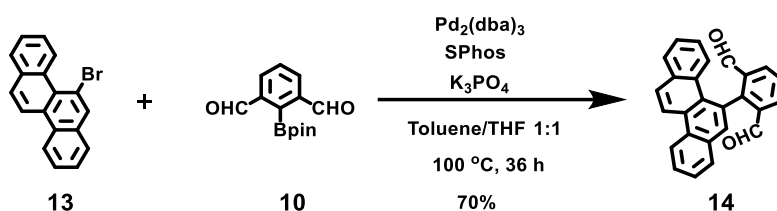

A 25 mL seal tube was charged with compound **13** (100 mg, 0.33 mmol), compound **10** (170 mg, 0.65 mmol), Pd<sub>2</sub>(dba)<sub>3</sub> (30 mg, 0.033 mmol, 10 mol%), Sphos (53.5 mg, 0.13 mmol, 40 mol%) and K<sub>3</sub>PO<sub>4</sub> (691 mg, 3.26 mmol) and was evacuated and charged with argon three times. Then degassed toluene (5 mL) and THF (5 mL) was added and the reaction was heated at 100 °C for 36 h under argon atmosphere. After cooling to room temperature, the mixture was poured into water and extracted with DCM. The organic layer was washed by brine and dried over anhydrous MgSO<sub>4</sub>. The solvent was removed under vacuum and the residue was purified by silica gel column chromatography (iso-hexane/DCM 1:1) to give compound **14** as a pale-red solid (82 mg, 70%). <sup>1</sup>H NMR (300 MHz, CD<sub>2</sub>Cl<sub>2</sub>) δ 9.69 (d, *J* = 0.8 Hz, 2H), 8.95-8.89 (2H), 8.37 (d, *J* = 7.7 Hz, 2H), 8.15 (d, *J* = 9.1 Hz, 1H), 7.99 (ddd, *J* = 11.2, 7.9, 1.5 Hz, 2H), 7.87-7.80 (3H), 7.73 (ddd, *J* = 8.0, 7.0, 1.1 Hz, 1H), 7.55-7.47 (2H), 7.16 (ddd, *J* = 8.7, 7.0, 1.5 Hz, 1H). <sup>13</sup>C NMR (75 MHz, CD<sub>2</sub>Cl<sub>2</sub>) δ 191.17, 151.44, 135.35, 134.26, 134.02, 133.84, 131.30, 131.15, 130.59, 130.40, 129.78, 129.70, 129.30, 129.09, 129.03, 128.67, 128.52, 128.07, 127.18, 126.79, 126.73, 123.96, 122.08. HR-ESI-MS (positive mode): calc. for [M+H]<sup>+</sup>: 361.1223, found for [M+H]<sup>+</sup>: 361.1214 (deviation: -2.4 ppm).

### Synthesis of 5,9-dimesityl-5,9-dihydrobenzo[4,5]indeno[6,7,1,2-ghij]pleiadene (**6**)

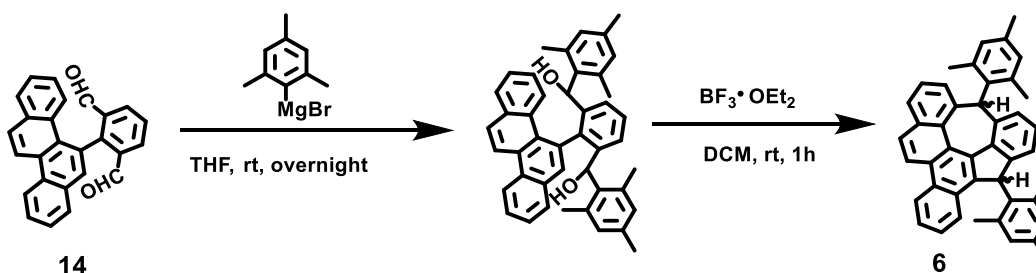

To a solution of compound **14** (95 mg, 0.26 mmol) in 15 mL of dry THF, mesitylmagnesium bromide (2.64 mL, 1M in diethylether, 2.64 mmol) was added under an argon atmosphere and the reaction mixture was stirred at room temperature for overnight. Then the reaction mixture was poured into 50 mL water and extracted by DCM. The organic layer was dried over anhydrous MgSO<sub>4</sub> and the solvent was removed under reduced pressure. The residue was redissolved in 20 mL of dry DCM under argon atmosphere and 2 mL of BF<sub>3</sub>·OEt<sub>2</sub> was added at 0 °C. The mixture was stirred for 40 min at room temperature and quenched with water at 0 °C. Then the reaction mixture was washed with NaHCO<sub>3</sub> solution (3x20 mL) and brine and dried over anhydrous MgSO<sub>4</sub>. The solvent was removed under reduced pressure. The residue was washed by methanol to give crude product. R<sub>f</sub>: 0.21 (DCM: isohexane = 1:10). This crude product can be further purified by recycle-GPC (GPC columns:

JAIGEL-2HH + JAIGEL-1HH; column solvent: chloroform; flow rate: 5.0 mL/min; collecting fraction at  $t = 75$  min-80 min) to give compound **6** as a pale-yellow solid (mixture of isomers, 105 mg, 70% yield in two steps).

Detailed  $^1\text{H}$  and  $^{13}\text{C}$  NMR spectroscopic data of the major isomer were reported in **Table S11**. HR-MALDI-TOF (matrix: DCTB): calc.  $[\text{M}]^+$ : 564.2812, found for  $[\text{M}]^+$ : 564.2830 (deviation: 3.2 ppm).

### Synthesis of 5,9-dimesitylbenzo[4,5]indeno[6,7,1,2-ghij]pleiadene (**3**)

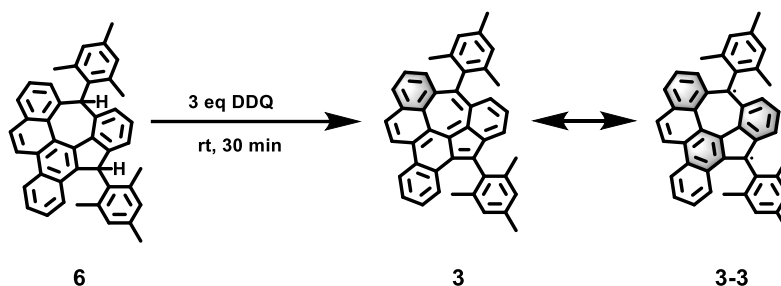

A 25 ml Schlenk flask was charged with compound **6** (50 mg, 0.088 mmol) and 5 mL anhydrous toluene. The mixture was bubbled with argon for 30 min, then a solution of DDQ (60 mg, 0.26 mmol) in 5 mL degassed anhydrous toluene was added dropwise. The reaction was monitored by HR-MALDI-TOF until completion. After stirring at room temperature for about 30 min, the reaction mixture was poured into a Bio-beads SX12 column and eluent with degassed anhydrous toluene under argon (as shown in the following Figure/Left) to remove most of the unreacted DDQ and its reduction side-product. The first green color fraction was collected in a dry 100 mL single-neck round bottle with bubbling of argon. And the solvent was removed under reduced pressure (as shown in the following Figure/Right). Then the round bottle was transferred to a glove box. The residue was washed with dry, degassed n-heptane to give 18 mg compound **3** as a deep green solid. HR-MALDI-TOF (matrix: DCTB): calc.  $[\text{M}]^+$ : 562.2655, found for  $[\text{M}]^+$ : 562.2667 (deviation: 2.1 ppm).

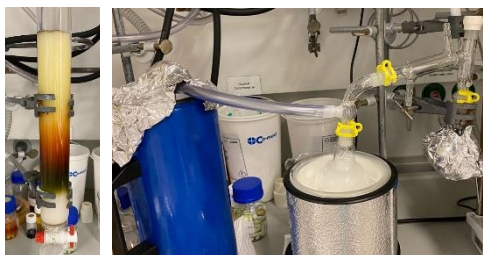

(Figure shows operation of Bio-beads SX12 column chromatography then collecting the first fraction then remove the eluent solvent (toluene) by distillation under reduced pressure at room temperature)



## 2. X-ray Crystallographic Analysis

Single crystal of **4-6** was obtained by slow evaporation of its dichloromethane/methanol solution. Accession codes: The X-ray crystallographic coordinates for structures reported in this article have been deposited at the Cambridge Crystallographic Data Centre (CCDC), under deposition number CCDC 2111792 (for **4**), 2111790 (for **5**) and 2111791 (for **6**). These data can be obtained free of charge from CCDC via [http://www.ccdc.cam.ac.uk/data\\_request/cif](http://www.ccdc.cam.ac.uk/data_request/cif).

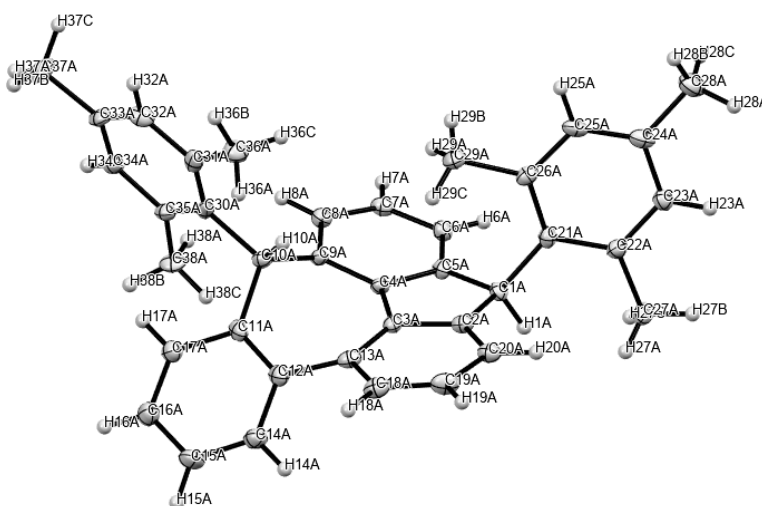

**Figure S2.** X-ray crystallographic structure of **4** (ORTEP drawing with at the 50% probability level).

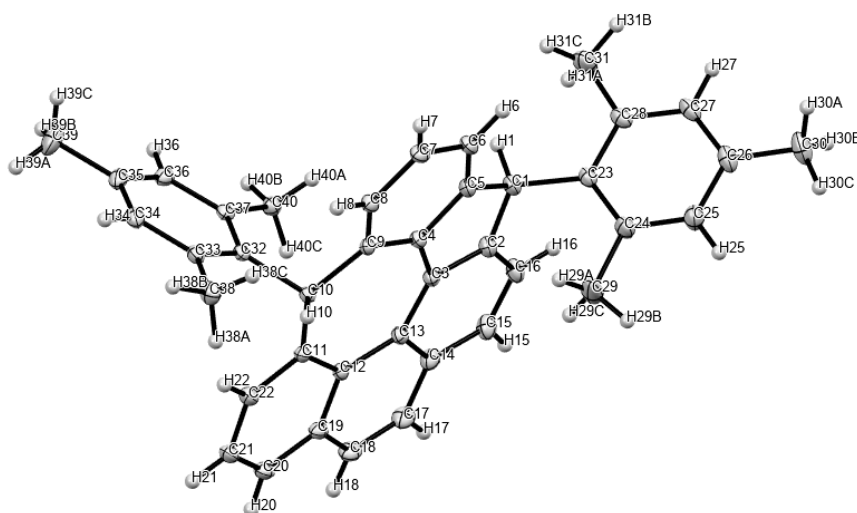

**Figure S3.** X-ray crystallographic structure of **5** (ORTEP drawing with at the 50% probability level).



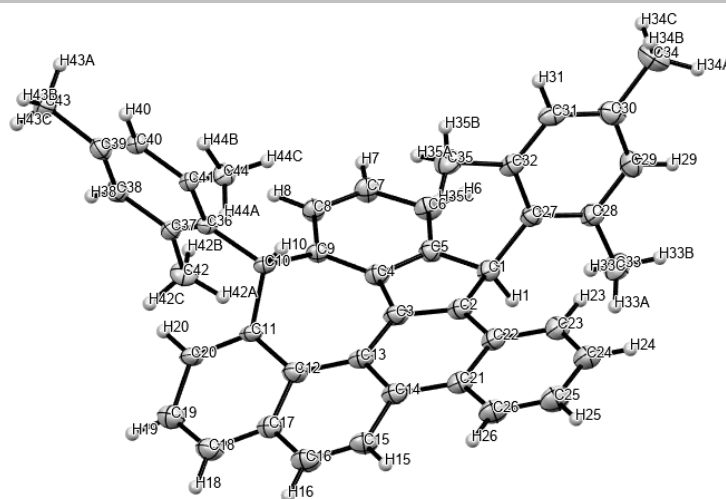

**Figure S4.** X-ray crystallographic structure of **6** (ORTEP drawing with at the 50% probability level).

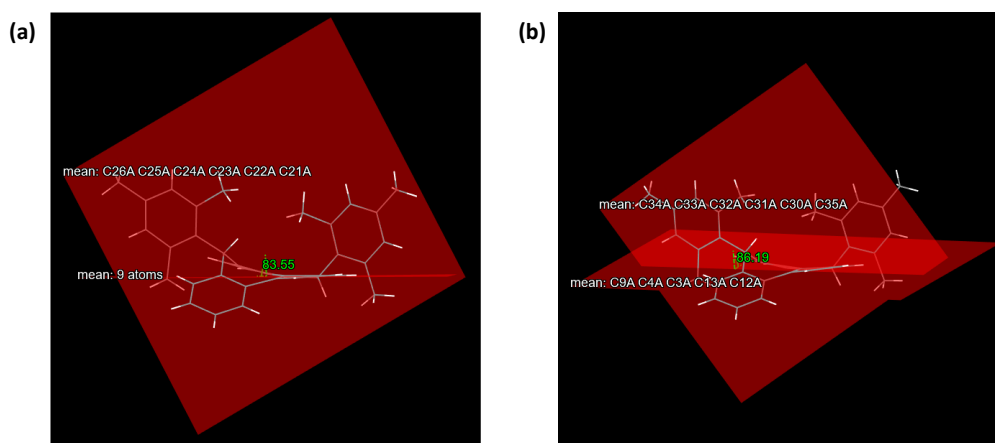

**Figure S5.** (a) 2,4,6-Trimethylphenyl ring in **4**, attached with the five-membered ring, is rotated out of plane by 83.55°; (b) 2,4,6-Trimethylphenyl ring in **4**, attached with the seven-membered ring, is rotated out of plane by 86.19°.

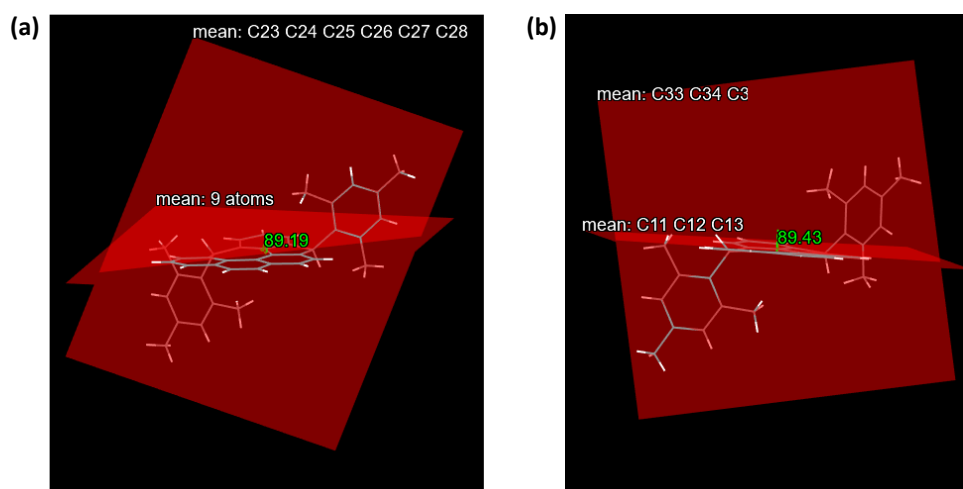

**Figure S6.** (a) 2,4,6-Trimethylphenyl ring in **5**, attached with the five-membered ring, is rotated out of plane by 89.19°; (b) 2,4,6-Trimethylphenyl ring in **5**, attached with the seven-membered ring, is rotated out of plane by 89.43°.

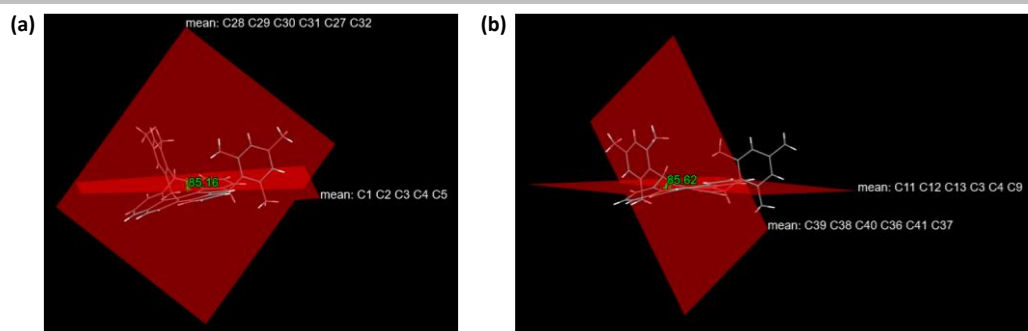

**Figure S7.** (a) 2,4,6-Trimethylphenyl ring in **6**, attached with the five-membered ring, is rotated out of plane by 85.16°; (b) 2,4,6-Trimethylphenyl ring in **6**, attached with the seven-membered ring, is rotated out of plane by 85.62°.

**Table S1.** Crystallographic data and details of the structure refinements of **4**, **5** and **6**.

| Crystal                                                                                 | <b>4</b>                                                           | <b>5</b>                                                         | <b>6</b>                                                         |
|-----------------------------------------------------------------------------------------|--------------------------------------------------------------------|------------------------------------------------------------------|------------------------------------------------------------------|
| Moiety formula                                                                          | 2C <sub>38</sub> H <sub>34</sub> /2CH <sub>2</sub> Cl <sub>2</sub> | C <sub>40</sub> H <sub>34</sub>                                  | C <sub>44</sub> H <sub>36</sub>                                  |
| Formula weight                                                                          | 1151.15                                                            | 514.67                                                           | 564.73                                                           |
| Crystal size, mm                                                                        | 0.07 × 0.08 × 0.1                                                  | 0.06 × 0.08 × 0.1                                                | 0.05 × 0.05 × 0.1                                                |
| Crystal system                                                                          | monoclinic                                                         | triclinic                                                        | triclinic                                                        |
| Space group                                                                             | <i>P</i> 2 <sub>1</sub>                                            | <i>P</i> $\bar{1}$                                               | <i>P</i> $\bar{1}$                                               |
| <i>a</i> , Å                                                                            | 8.8500(18)                                                         | 8.1200(16)                                                       | 9.890(2)                                                         |
| <i>b</i> , Å                                                                            | 14.500(3)                                                          | 12.280(3)                                                        | 12.050(2)                                                        |
| <i>c</i> , Å                                                                            | 23.750(5)                                                          | 14.770(3)                                                        | 12.290(3)                                                        |
| $\alpha$ , deg                                                                          | 90                                                                 | 106.55(3)                                                        | 84.45(3)                                                         |
| $\beta$ , deg                                                                           | 99.66(3)                                                           | 96.00(3)                                                         | 88.28(3)                                                         |
| $\gamma$ , deg                                                                          | 90                                                                 | 93.65(3)                                                         | 88.54(3)                                                         |
| Volume, Å <sup>3</sup>                                                                  | 3004.5(11)                                                         | 1397.3(5)                                                        | 1456.8(5)                                                        |
| <i>Z</i>                                                                                | 2                                                                  | 2                                                                | 2                                                                |
| <i>D</i> <sub>calcd.</sub> , g cm <sup>-3</sup>                                         | 1.272                                                              | 1.223                                                            | 1.287                                                            |
| <i>F</i> <sub>000</sub>                                                                 | 1216                                                               | 548                                                              | 600                                                              |
| <i>T</i> , K                                                                            | 100(2)                                                             | 100(2)                                                           | 100(2)                                                           |
| Radiation ( $\lambda$ , Å)                                                              | synchrotron (0.7999)                                               | synchrotron(0.82656)                                             | synchrotron (0.7999)                                             |
| $\mu$ , mm <sup>-1</sup>                                                                | 0.336                                                              | 0.095                                                            | 0.094                                                            |
| 2 $\theta$ range (°)                                                                    | 1.958 to 73.306                                                    | 3.374 to 67.95                                                   | 3.748 to 73.308                                                  |
| Index ranges                                                                            | -13 ≤ <i>h</i> ≤ 13, -20 ≤ <i>k</i> ≤ 20,<br>-31 ≤ <i>l</i> ≤ 31   | -10 ≤ <i>h</i> ≤ 10, -16 ≤ <i>k</i> ≤ 16,<br>-19 ≤ <i>l</i> ≤ 19 | -14 ≤ <i>h</i> ≤ 14, -17 ≤ <i>k</i> ≤ 17,<br>-16 ≤ <i>l</i> ≤ 16 |
| no. of collected reflections                                                            | 55080                                                              | 21738                                                            | 27190                                                            |
| no. of unique ref. ( <i>R</i> <sub>int</sub> )                                          | 17697 (0.0206)                                                     | 6363 (0.0217)                                                    | 7962 (0.0240)                                                    |
| Data/restraints/parameters                                                              | 17697 / 1 / 751                                                    | 6363 / 0 / 367                                                   | 7962 / 0 / 403                                                   |
| <i>R</i> <sub>1</sub> , <i>wR</i> <sub>2</sub> [obs <i>I</i> > 2 $\sigma$ ( <i>I</i> )] | 0.0420, 0.1211                                                     | 0.0481, 0.1311                                                   | 0.0615, 0.1664                                                   |
| <i>R</i> <sub>1</sub> , <i>wR</i> <sub>2</sub> (all data)                               | 0.0428, 0.1221                                                     | 0.0490, 0.1322                                                   | 0.0636, 0.1686                                                   |
| residual peak/hole, e. Å <sup>-3</sup>                                                  | 0.447 / -0.700                                                     | 0.406 / -0.376                                                   | 0.704 / -0.379                                                   |
| Goodness-of-fit on <i>F</i> <sup>2</sup>                                                | 1.085                                                              | 1.042                                                            | 1.032                                                            |
| CCDC                                                                                    | 2111792                                                            | 2111790                                                          | 2111791                                                          |

### 3. Optical Properties

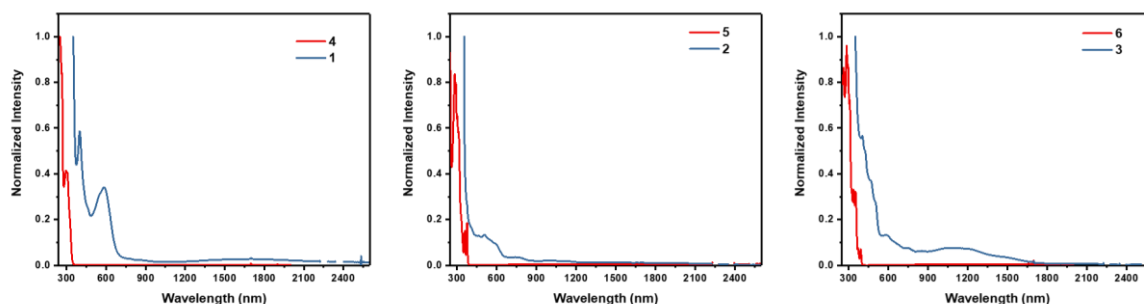

**Figure S8.** Normalized UV/Vis/NIR absorption spectra of **1**, **2** and **3** compare with their dihydrogen-precursors **4**, **5** and **6**. The spectra were recorded in dry and degassed  $\text{CH}_2\text{Cl}_2$  at room temperature. The background absorbance at ca. 2250 nm and 2370 nm was deleted which may arise from the overtone of CH vibration of the solvent

Time-depended UV/Vis/NIR absorption spectra of **1-3** were performed to test their stabilities. During the stability test, the solution of **1-3** in dry  $\text{CH}_2\text{Cl}_2$  was exposed to ambient air and sun light conditions. With the time going on, the solution slowly decomposed with a decrease of the optical density at near-infrared region. By plotting the absorption intensity with ambient light irradiation time, according to the linear regression and extrapolation to % change = 0.50, the half-life time ( $t_{1/2}$ ) of **1-3** was estimated as 11.7 h, 23.8 h and 33.3 h under ambient air and sun light condition, respectively.

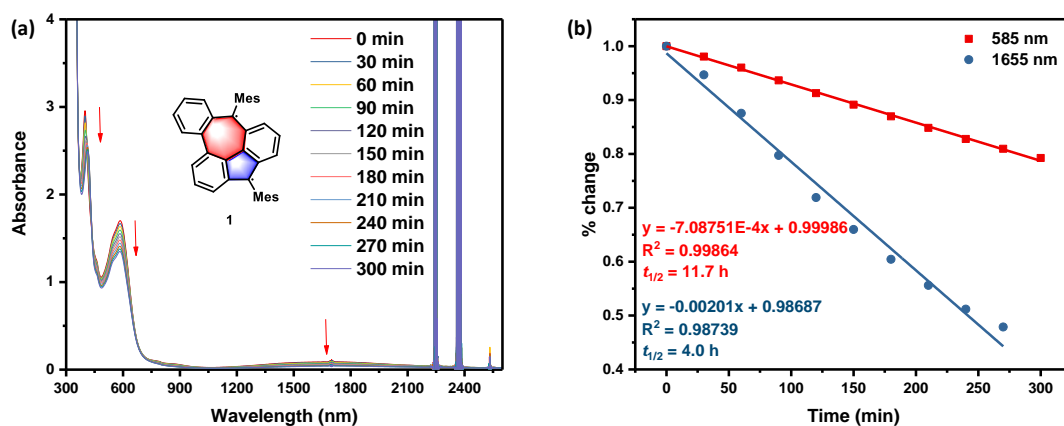

**Figure S9.** (a) Time-depended UV/Vis/NIR absorption spectra of **1**. The spectra were recorded in dry and degassed  $\text{CH}_2\text{Cl}_2$  under ambient air and light irradiation. The background absorbance at ca. 2250 nm and 2370 nm may arise from the overtone of CH vibration of the solvent. (b) Changes of the optical density at the absorption maximum at 1655 nm and 585 nm of **1** under ambient condition.

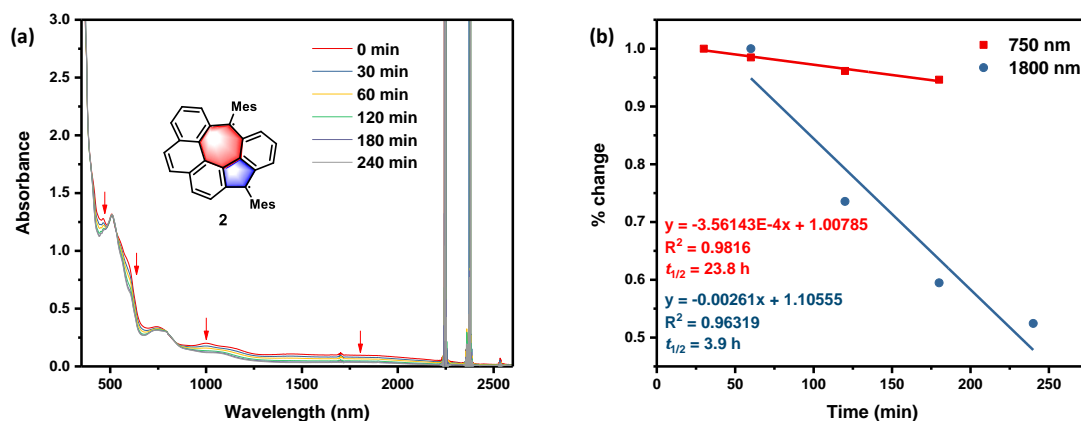

**Figure S10.** (a) Time-dependent UV/Vis/NIR absorption spectra of **2**. The spectra were recorded in dry and degassed CH<sub>2</sub>Cl<sub>2</sub> under ambient air and light irradiation. The background absorbance at ca. 2250 nm and 2370 nm may arise from the overtone of CH vibration of the solvent. (b) Changes of the optical density at the absorption maximum at 1800 nm and 750 nm of **2** under ambient condition.

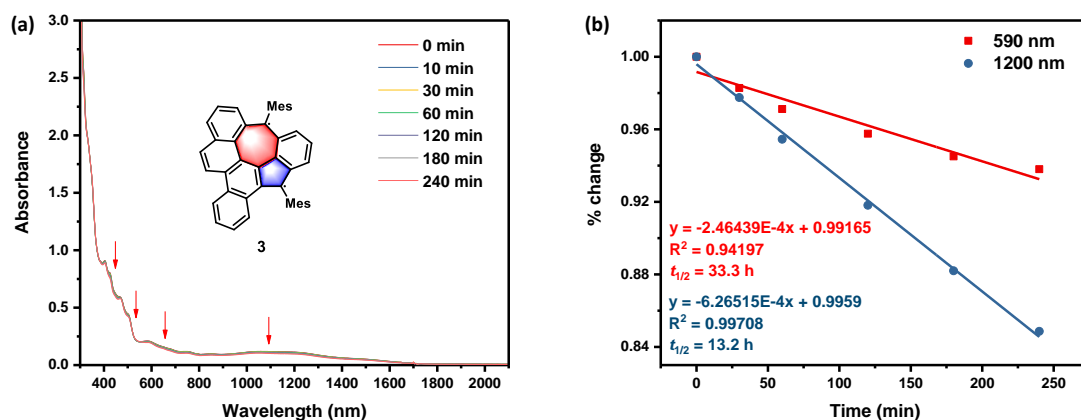

**Figure S11.** (a) Time-dependent UV/Vis/NIR absorption spectra of **3**. The spectra were recorded in dry and degassed CH<sub>2</sub>Cl<sub>2</sub> under ambient air and light irradiation. The background absorbance at ca. 2250 nm and 2370 nm may arise from the overtone of CH vibration of the solvent. (b) Changes of the optical density at the absorption maximum at 1200 nm and 590 nm of **3** under ambient condition.

#### 4. EPR Analysis

Unless otherwise noted, commercially available starting materials, reagents, catalysts, and dry solvents were used.

Continuous wave (CW) EPR measurements were carried out on a Bruker EMXmicro spectrometer equipped with a Bruker ER4122-SHQE-W1 resonator and an Oxford Instruments ESR900 cryostat. The temperature was varied using an Oxford Instrument ITC503 controller. Typical scans used 50  $\mu$ W power, 1 G modulation amplitude, 100 kHz modulation frequency, 20 ms time constant. For each temperature we checked that the signal was not saturated by measuring the signal intensity at different powers and observing a linear behaviour. The data was then fit to the Bleaney-Bowers equation to obtain the value of exchange coupling  $J$  (or the singlet-triplet energy gap  $\Delta E_{ST}$ , in which  $\Delta E_{ST} = -J$ ):

$$\chi_m(T) = \frac{2N_A\mu_B^2g^2}{k_B T} \times \frac{1}{3 + \exp(-J/k_B T)}$$

Where  $N_A$  is the Avogadro constant,  $\mu_B$  the Bohr magneton,  $g$  the Landé factor,  $k_B$  the Boltzmann constant<sup>[5]</sup> Indeed, the mass measured includes both the mass of the diamagnetic part of the sample and the singlet biradical subset.

We simulated the solution EPR measurements using the following Hamiltonian:

$$H = \mu_B g B S_z + \sum_i^N a_{iso}^{(i)} S_z I_z,$$

where,  $\mu_B$  is the Bohr magneton,  $g$  the isotropic Landé factor,  $a_{iso}^{(i)}$  the isotropic hyperfine coupling of the  $i$ -th nucleus, and  $N$  the number of coupled nuclei. All simulations were carried out using the Matlab package Easyspin.

Spin-unrestricted Density Functional Theory (DFT) calculations of the spin density and the EPR constants were carried using the software ORCA 4.2.1 at the PBE0/EPR-II level of theory using the optimized geometry structures by DFT at the B3LYP/6-31 G(d) level.

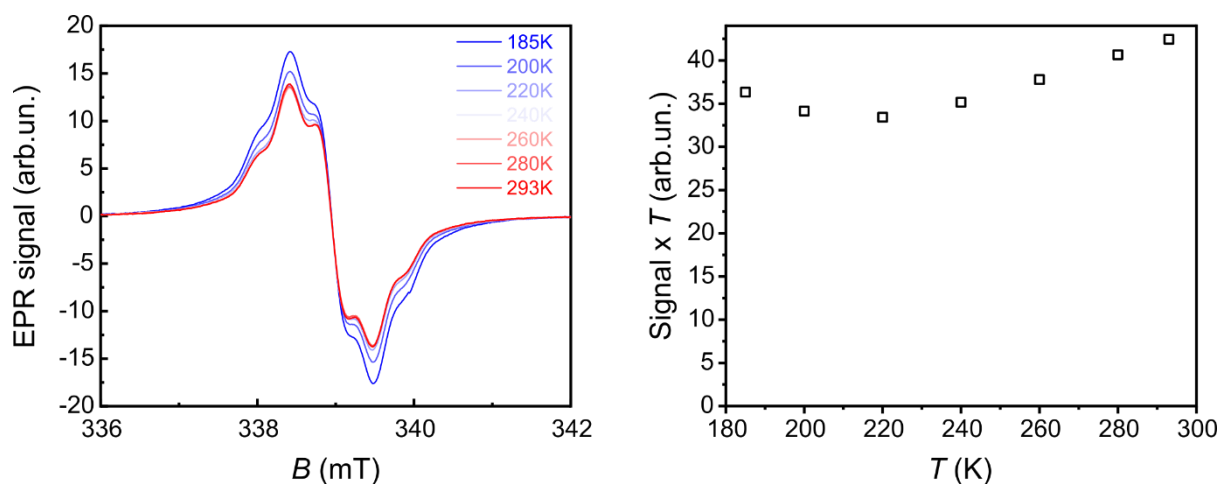

**Figure S12.** Temperature dependence of the signal for **1** in toluene solution. Integrated signal multiplied by temperature.

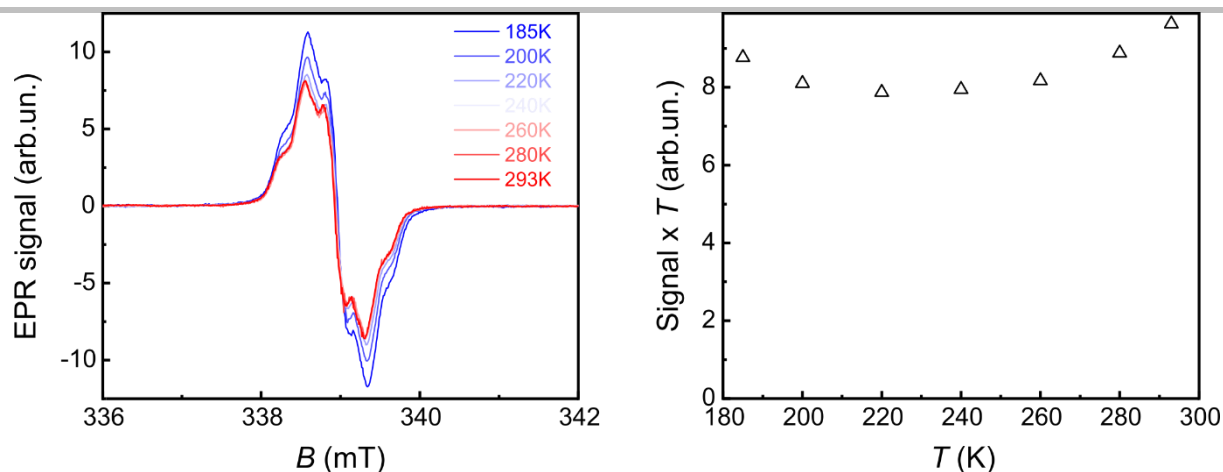

**Figure S13.** Temperature dependence of the signal for **2** in toluene solution. Integrated signal multiplied by temperature.

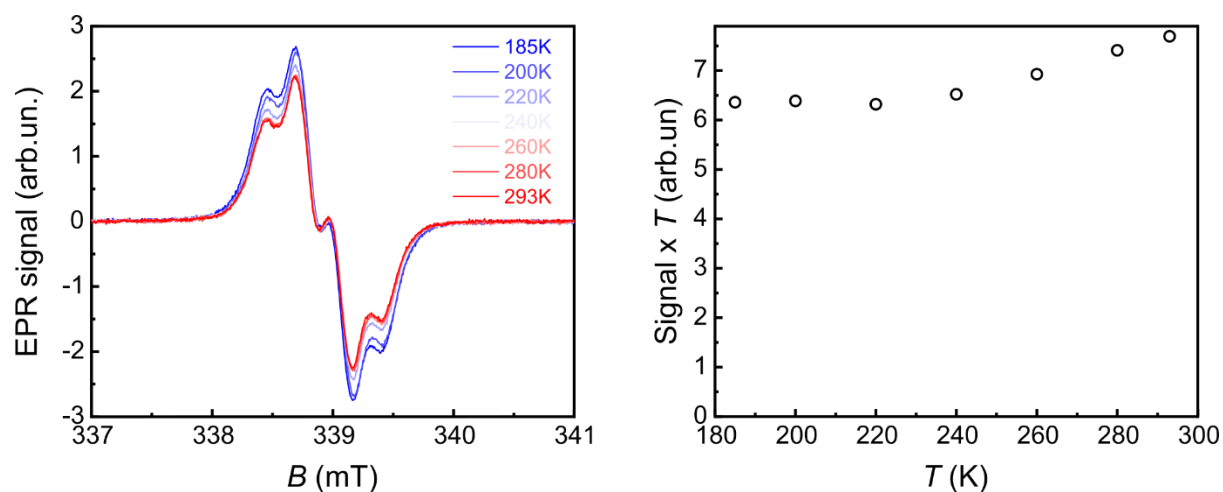

**Figure S14.** Temperature dependence of the signal for **3** in toluene solution. Integrated signal multiplied by temperature.

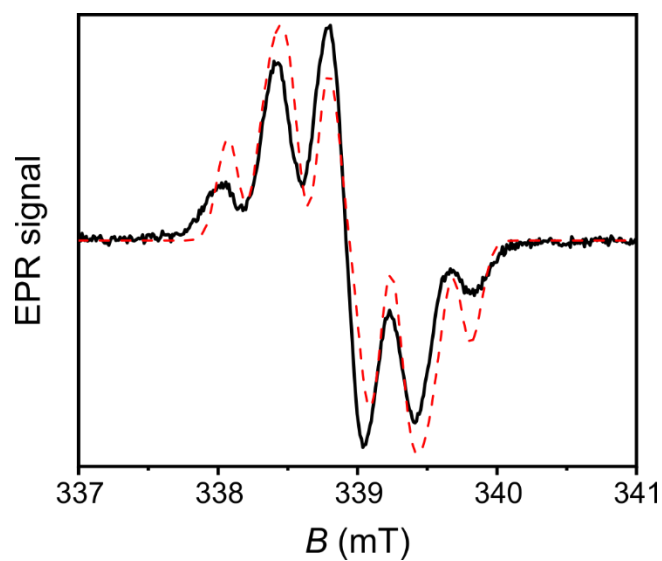

**Figure S15.** Room temperature continuous wave EPR spectrum of **1** in toluene solution (solid line), and simulation (dashed line).

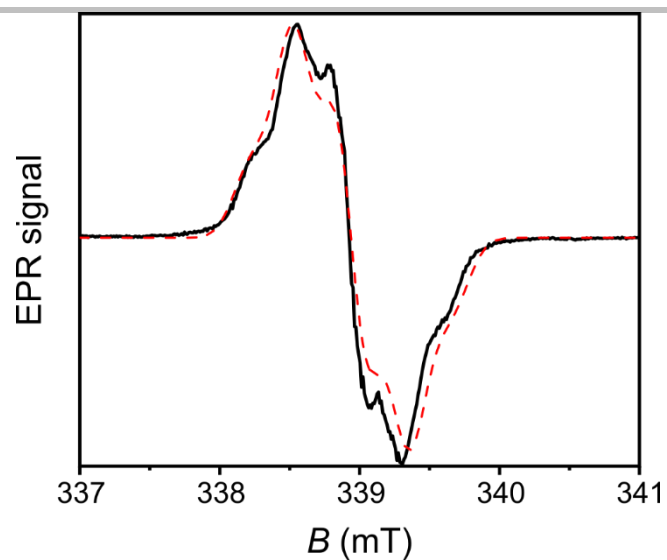

**Figure S16.** Room temperature continuous wave EPR spectrum of **2** in toluene solution (solid line), and simulation (dashed line).

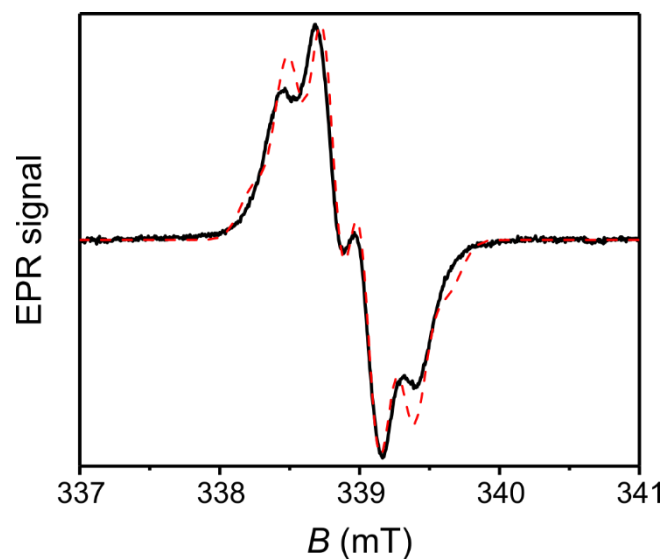

**Figure S17.** Room temperature continuous wave EPR spectrum of **3** in toluene solution (solid line), and simulation (dashed line).

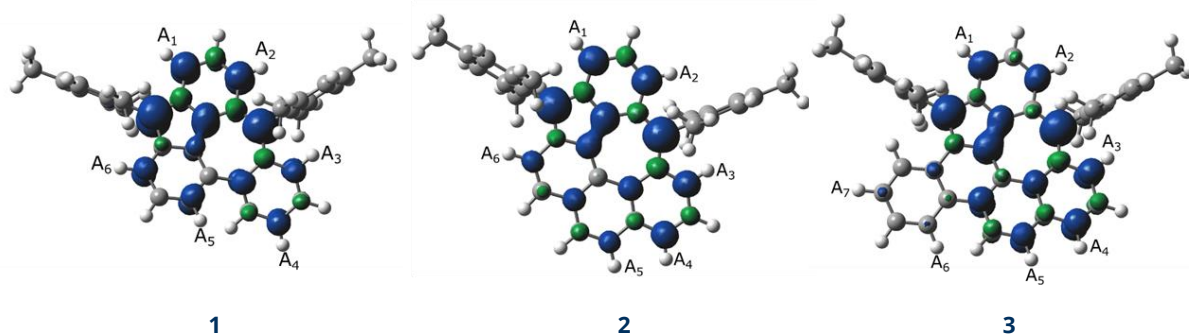

**Figure S18.** Spin density surfaces calculated by DFT PBE0/EPR-II in the triplet state, iso value 0.005. Labels indicate the coupled nuclei, EPR parameters are listed in the table.

**Table S2.** Isotropic EPR parameters for **1**, **2** and **3**, as calculated by DFT and the best fit parameters for the simulations.

|                             | <b>1</b> |          | <b>2</b> |          | <b>3</b> |          |
|-----------------------------|----------|----------|----------|----------|----------|----------|
|                             | DFT      | Best fit | DFT      | Best fit | DFT      | Best fit |
| <i>g</i>                    | 2.0026   | 2.0026   | 2.0025   | 2.0026   | 2.0025   | 2.0026   |
| <i>A</i> <sub>1</sub> (MHz) | 11.8     | 11.1     | 11.3     | 8.9      | 10.1     | 7.6      |
| <i>A</i> <sub>2</sub> (MHz) | 11.5     | 11.6     | 11.0     | 8.4      | 8.1      | 7.2      |
| <i>A</i> <sub>3</sub> (MHz) | 6.6      | 8.0      | 8.3      | 7.6      | 8.4      | 7        |
| <i>A</i> <sub>4</sub> (MHz) | 6.5      | 8.5      | 8.4      | 7.4      | 8.2      | 6.3      |
| <i>A</i> <sub>5</sub> (MHz) | 6.6      | 4.6      | 4.9      | 3.2      | 3.5      | 5.5      |
| <i>A</i> <sub>6</sub> (MHz) | 6.1      | 1.7      | 5        | 3.3      | 1.1      | 1.25     |
| <i>A</i> <sub>7</sub> (MHz) | --       | --       | --       | --       | 1.4      | 1.4      |

Since the DDQ radical anion could be also generated during the oxidative dehydrogenation reactions of the dehydro precursors, DDQ radical anion was prepared by treating DDQ with bis(cyclopentadienyl)cobalt (Cp<sub>2</sub>Co) in THF in the glovebox and measured its EPR for comparison. Experiment show this EPR spectra are not come from DDQ radical anion, due to the reasonably large difference in *g*-factor (DDQ radical anion is 2.005 and the samples are 2.0026).

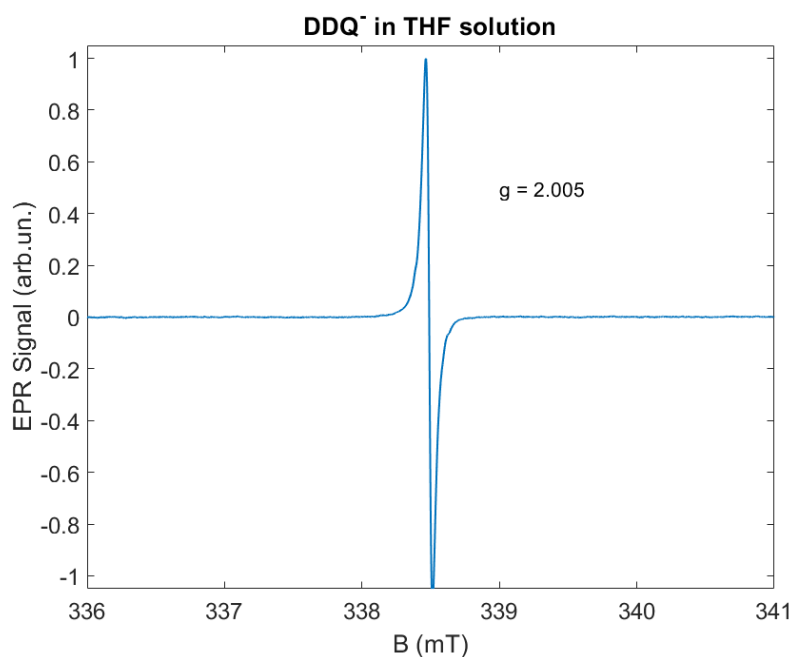

**Figure S19.** Room temperature EPR spectrum of DDQ radical anion in THF solution. (Prepared through DDQ react with Cp<sub>2</sub>Co in THF in the glovebox. We observed changed in colour of the solution. However, N hyperfine coupling was not observed, but the *g*-factor corresponds to literature<sup>[6]</sup> and calculations.



## 5. DFT Calculation

All density functional theory (DFT) calculation was performed using the Gaussian 09 program.<sup>[7]</sup> The geometry optimization of compound **1-3** in the ground state was optimized by the UB3LYP/6-31G(d) and B3LYP/6-31G(d). All geometry optimization was done in the gas phase. Singlet biradical character index ( $y_0$ ) was estimated using a symmetry-broken UHF/6-31G(d) method after geometry optimization. The following equation showed the calculate method:<sup>[8]</sup>

$$y = 1 - 2T/(1 + T^2)$$

$T$  is the orbital overlap between the corresponding orbital pairs (HOMO and LUMO), it can be calculated by using the following equation:

$$T = (n_{HOMO} - n_{LUMO})/2$$

Anisotropy of the induced current density (ACID) plots were calculated by Herges's method.<sup>[9]</sup> Nucleus independent chemical shifts (NICS) values were calculated using the standard gauge invariant atomic orbital (GIAO)<sup>[10]</sup> method at the level of B3LYP/6-31+G(2d, p) and UB3LYP/6-31+G(2d,p), respectively. All NICS values were averaged by two positions (above and below the plane) of each molecule.

**Table S3.** Calculation of the biradical character of **1**

| $E$ (closed shell state) | $E$ (open shell singlet biradical state) | $E$ (open shell triplet state) | $\Delta E_{ST}$ ( $E$ open shell singlet biradical state - $E$ open shell triplet state) | $y_0$<br>(Biradical yield)<br>UHF/6-31G (d) |
|--------------------------|------------------------------------------|--------------------------------|------------------------------------------------------------------------------------------|---------------------------------------------|
| -1467.508272 a.u.        | -1467.511786 a.u.                        | -1467.514861 a.u.              | 1.93 kcal/mol                                                                            | 0.75                                        |

**Table S4.** Calculation of the biradical character of **2**

| $E$ (closed shell state) | $E$ (open shell singlet biradical state) | $E$ (open shell triplet state) | $\Delta E_{ST}$ ( $E$ open shell singlet biradical state - $E$ open shell triplet state) | $y_0$<br>(Biradical yield) |
|--------------------------|------------------------------------------|--------------------------------|------------------------------------------------------------------------------------------|----------------------------|
| -1543.757932 a.u.        | -1543.758735 a.u.                        | -1543.760127 a.u.              | 0.873 kcal/mol                                                                           | 0.62                       |

**Table S5.** Calculation of the biradical character of **3**

| $E$ (closed shell state) | $E$ (open shell singlet biradical state) | $E$ (open shell triplet state) | $\Delta E_{ST}$ ( $E$ open shell singlet biradical state - $E$ open shell triplet state) | $y_0$<br>(Biradical yield) |
|--------------------------|------------------------------------------|--------------------------------|------------------------------------------------------------------------------------------|----------------------------|
| -1697.42293 a.u.         | -1697.423025 a.u.                        | -1697.420363 a.u.              | -1.67 kcal/mol                                                                           | 0.48                       |

| Molecule                                                                               | Geometry Structure                                                                | Spin Density                                                                      | SOMO- $\alpha$                                                                     | SOMO- $\beta$                                                                       |
|----------------------------------------------------------------------------------------|-----------------------------------------------------------------------------------|-----------------------------------------------------------------------------------|------------------------------------------------------------------------------------|-------------------------------------------------------------------------------------|
| 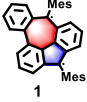<br>1 |  |  |  |  |
| <br>2 |  |  |  |  |
| <br>3 |  |  |  |  |

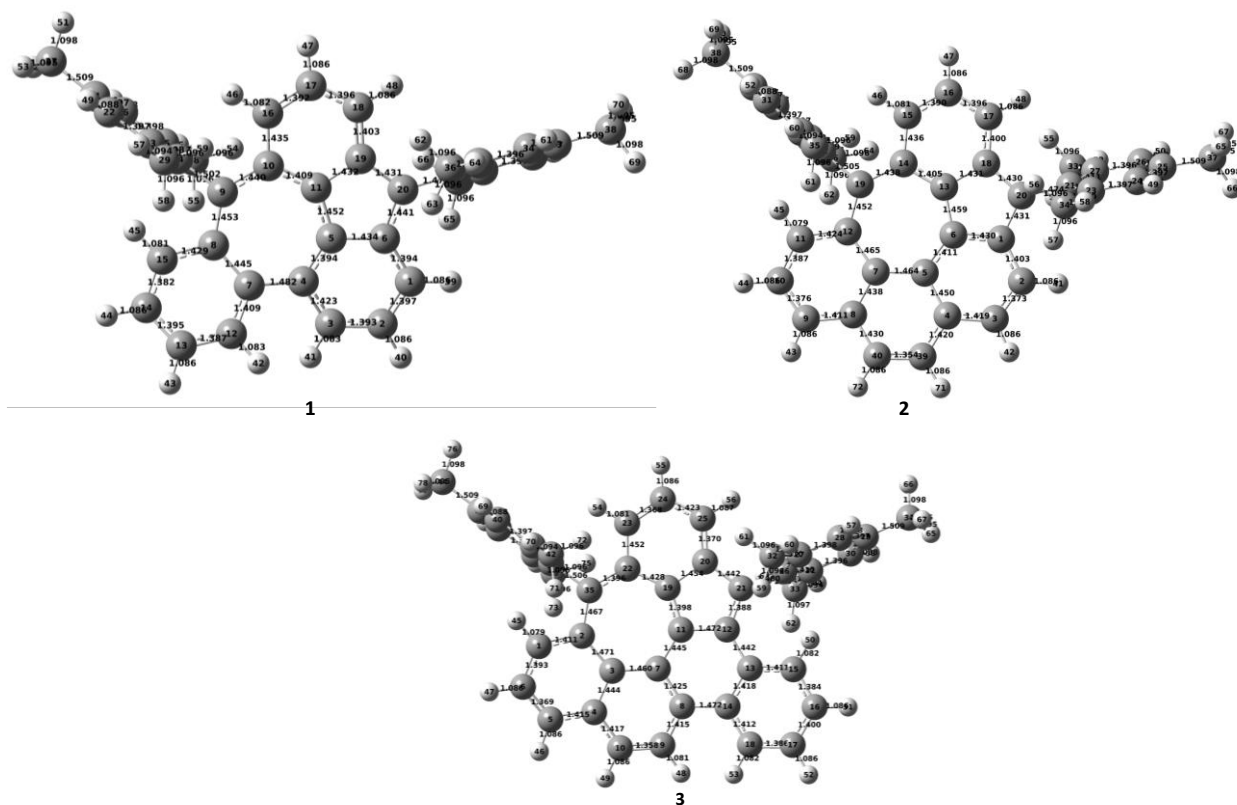

**Figure S20.** Visualization of optimized geometry structure (side view), spin density and the single occupied molecular orbitals SOMO- $\alpha$ , SOMO- $\beta$  and bond length plots for **1**, **2** and **3**

As shown in Figure S20, the DFT-optimized structures of **1-3** have a near-planar backbone, respectively. Compared to **3**, the carbon-carbon bond lengths of C8-C9, C9-C10, C19-C20 and C6-C20 in **1** or C12-C19, C14-C19, C18-C20 and C1-C20 in **2** are more closed to the carbon-carbon single bond's length. This result suggests that **1** and **2** show stronger open-shell resonance form, which are consistent with their higher diradical yields ( $y_0 = 0.75$ ,  $0.62$  and  $0.48$  for **1**, **2** and **3**, respectively) that are calculated by the UHF method.

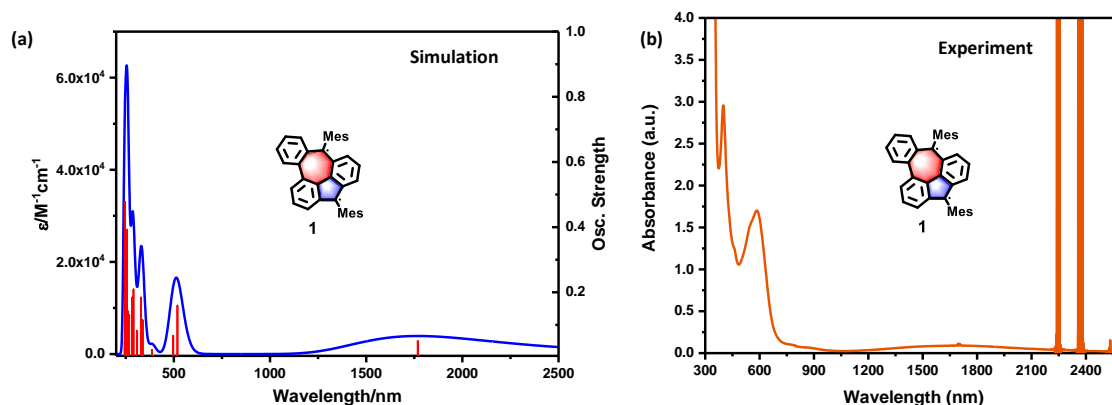

**Figure S21.** (a) Calculated (UB3LYP/ wb97xd) stick spectrum for **1** showing oscillator strengths; (b) Experimental UV-vis spectra of **1** in dichloromethane.

**Table S6.** TD-DFT (UB3LYP/ wb97xd) calculated energies, oscillator strength ( $f$ ) and compositions of major electronic transitions of **1**

| Energy (eV) | Wavelength (nm) | $f$     | Major contributions*                                                                                                                                                                                                                        |
|-------------|-----------------|---------|---------------------------------------------------------------------------------------------------------------------------------------------------------------------------------------------------------------------------------------------|
| 0.7014      | 1767.67         | 0.05080 | Hb $\rightarrow$ Lb 50.0%, Ha $\rightarrow$ La 50.0%                                                                                                                                                                                        |
| 2.3903      | 518.70          | 0.15970 | Hb-1 $\rightarrow$ Lb 47.8%, Ha-1 $\rightarrow$ La 47.8%                                                                                                                                                                                    |
| 2.4964      | 496.65          | 0.06710 | Hb $\rightarrow$ Lb+1 47.9%, Ha $\rightarrow$ La+1 47.9%                                                                                                                                                                                    |
| 3.1527      | 393.26          | 0.00460 | Hb-4 $\rightarrow$ Lb 44.5%, Ha-4 $\rightarrow$ La 44.5%                                                                                                                                                                                    |
| 3.2143      | 385.73          | 0.02340 | Ha-5 $\rightarrow$ La 23.7%, Hb-5 $\rightarrow$ Lb 23.7%,<br>Ha-2 $\rightarrow$ La 9.7%, Hb-2 $\rightarrow$ Lb 9.7%,<br>Hb-6 $\rightarrow$ Lb 7.1%, Ha-6 $\rightarrow$ La 7.1%                                                              |
| 3.6336      | 341.22          | 0.00080 | Ha-6 $\rightarrow$ La 35.3%, Hb-6 $\rightarrow$ Lb 35.3%,<br>Hb-5 $\rightarrow$ Lb 13.5%, Ha-5 $\rightarrow$ La 13.5%                                                                                                                       |
| 3.6739      | 337.47          | 0.11490 | Hb-2 $\rightarrow$ Lb 19.4%, Ha-2 $\rightarrow$ La 19.4%,<br>Ha-7 $\rightarrow$ La 12.1%, Hb-7 $\rightarrow$ Lb 12.1%,<br>Ha-5 $\rightarrow$ La 8.4%, Hb-5 $\rightarrow$ Lb 8.4%,<br>Ha-6 $\rightarrow$ La 5.1%, Hb-6 $\rightarrow$ Lb 5.1% |
| 3.7631      | 329.47          | 0.18450 | Hb-7 $\rightarrow$ Lb 25.4%, Ha-7 $\rightarrow$ La 25.4%,<br>Ha-2 $\rightarrow$ La 16.2%, Hb-2 $\rightarrow$ Lb 16.2%                                                                                                                       |
| 4.0053      | 309.55          | 0.08240 | Ha $\rightarrow$ La+2 23.6%, Hb $\rightarrow$ Lb+2 23.6%,<br>Ha-1 $\rightarrow$ La+1 11.2%, Hb-1 $\rightarrow$ Lb+1<br>11.2%,<br>Ha $\rightarrow$ La+7 5.4%, Hb $\rightarrow$ Lb+7 5.4%                                                     |
| 4.1420      | 299.33          | 0.00170 | Hb-3 $\rightarrow$ Lb 46.4%, Ha-3 $\rightarrow$ La 46.4%                                                                                                                                                                                    |

\*Ha: HOMO ( $\alpha$ ); Hb: HOMO ( $\beta$ ); La: LUMO ( $\alpha$ ); Lb: LUMO ( $\beta$ )

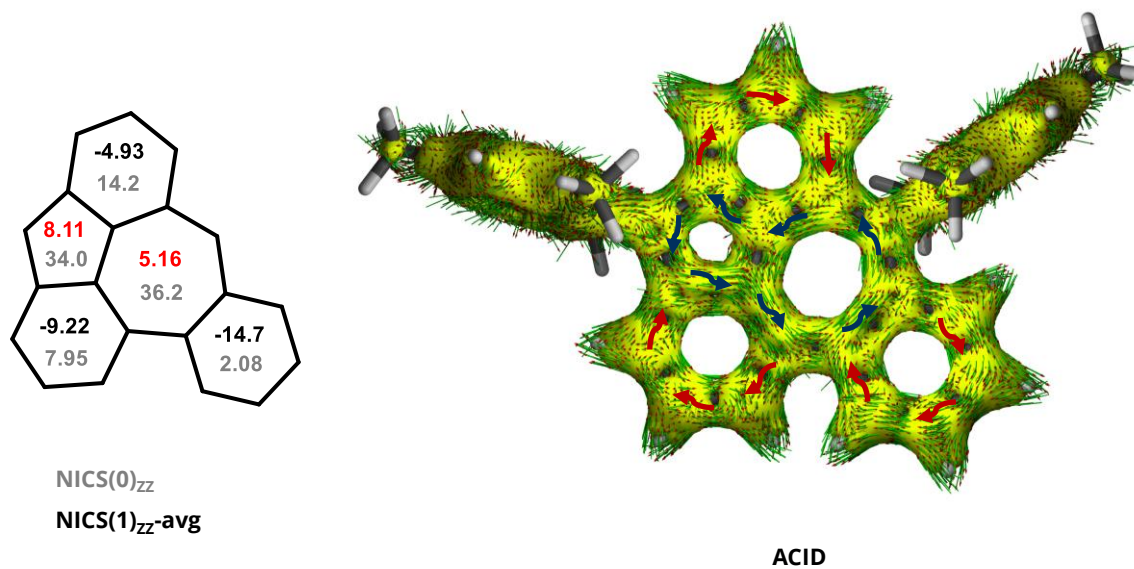

**Figure S22.** Calculated NICS and ACID plots of **1** at the level of UB3LYP/6-311+G (d, 2p) (D3BJ)

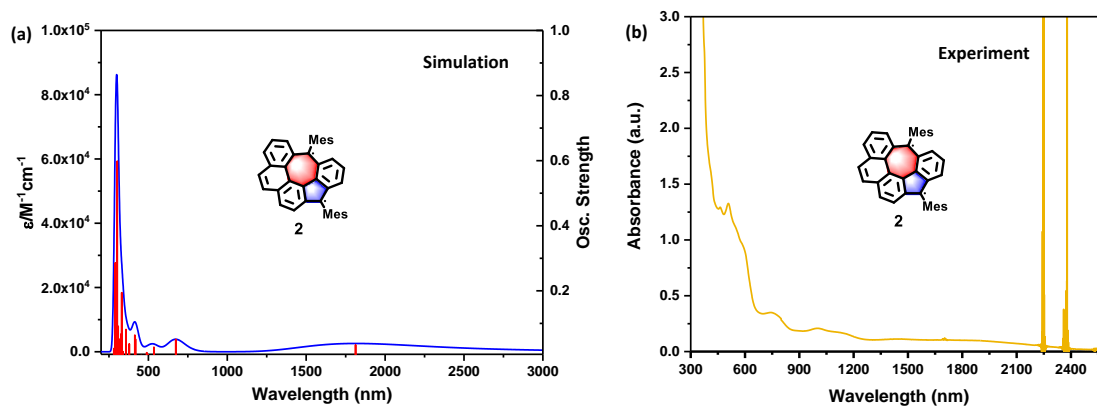

**Figure S23.** (a) Calculated (UB3LYP/6-31G(d) (D3BJ) stick spectrum for **2** showing oscillator strengths; (b) Experimental UV-vis spectra of **2** in dichloromethane.

**Table S7.** TD-DFT (UB3LYP/6-31G(d) (D3BJ) calculated energies, oscillator strength ( $f$ ) and compositions of major electronic transitions of **2**

| Energy (eV) | Wavelength (nm) | $f$     | Major contributions*                                                                                                  |
|-------------|-----------------|---------|-----------------------------------------------------------------------------------------------------------------------|
| 0.6838      | 1813.16         | 0.03340 | Hb $\rightarrow$ Lb 51.3%, Ha $\rightarrow$ La 51.3%                                                                  |
| 1.8417      | 673.21          | 0.05030 | Hb-1 $\rightarrow$ Lb 48.9%, Ha-1 $\rightarrow$ La 48.9%                                                              |
| 2.3193      | 534.58          | 0.02630 | Hb $\rightarrow$ Lb+1 48.4%, Ha $\rightarrow$ La+1 48.4%                                                              |
| 2.4871      | 498.51          | 0.00240 | Ha-4 $\rightarrow$ La 33.6%, Hb-4 $\rightarrow$ Lb 33.6%,<br>Hb-2 $\rightarrow$ Lb 16.0%, Ha-2 $\rightarrow$ La 16.0% |
| 2.5346      | 489.17          | 0.01000 | Hb-2 $\rightarrow$ Lb 33.5%, Ha-2 $\rightarrow$ La 33.5%,<br>Hb-4 $\rightarrow$ Lb 16.0%, Ha-4 $\rightarrow$ La 16.0% |
| 2.7298      | 454.19          | 0.00110 | Hb-3 $\rightarrow$ Lb 49.5%, Ha-3 $\rightarrow$ La 49.5%                                                              |
| 2.7798      | 446.02          | 0.00010 | Hb-5 $\rightarrow$ Lb 49.8%, Ha-5 $\rightarrow$ La 49.8%                                                              |
| 2.9656      | 418.07          | 0.05120 | Hb-6 $\rightarrow$ Lb 24.0%, Ha-6 $\rightarrow$ La 24.0%,<br>Hb $\rightarrow$ Lb+2 23.1%, Ha $\rightarrow$ La+2 23.1% |
| 2.9958      | 413.86          | 0.06330 | Hb-6 $\rightarrow$ Lb 25.4%, Ha-6 $\rightarrow$ La 25.4%,<br>Hb $\rightarrow$ Lb+2 21.2%, Ha $\rightarrow$ La+2 21.2% |
| 3.2732      | 378.79          | 0.03670 | Ha-7 $\rightarrow$ La 42.5%, Hb-7 $\rightarrow$ Lb 42.5%                                                              |

\*Ha: HOMO ( $\alpha$ ); Hb: HOMO ( $\beta$ ); La: LUMO ( $\alpha$ ); Lb: LUMO ( $\beta$ )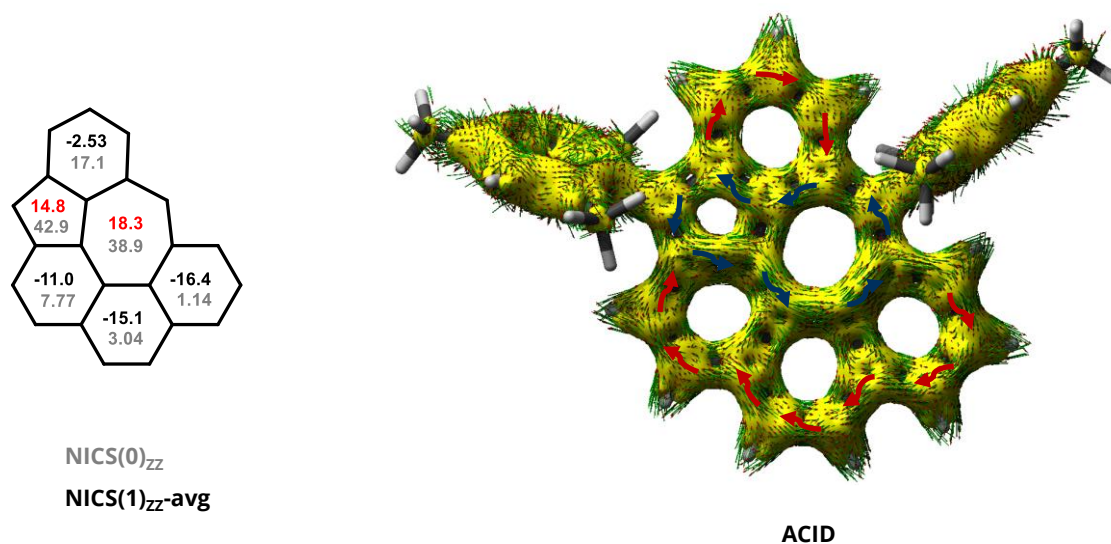**Figure S24.** Calculated NICS and ACID plots of **2** at the level of UB3LYP/6-311+G (d, 2p) (D3BJ)

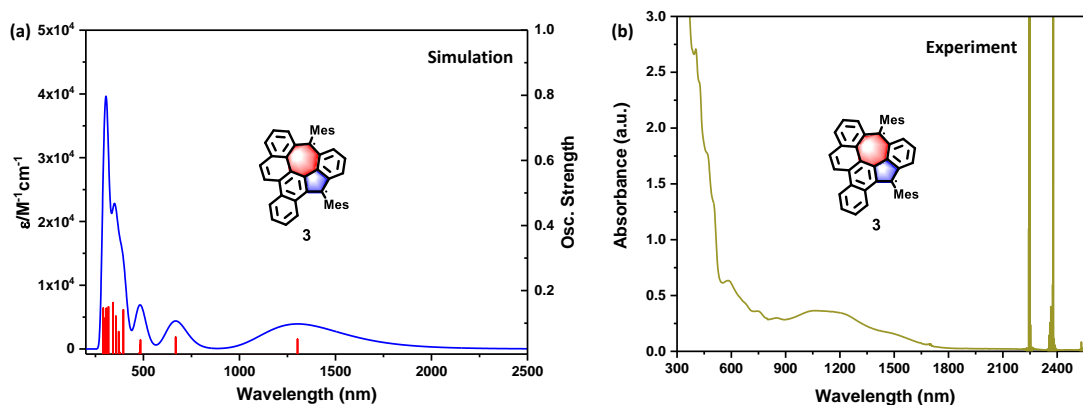

**Figure S25.** (a) Calculated (UB3LYP/6-31G(d) (D3BJ) stick spectrum for **3** showing oscillator strengths; (b) Experimental UV-vis spectra of **3** in dichloromethane.

**Table S8.** TD-DFT (UB3LYP/6-31G(d) (D3BJ) calculated energies, oscillator strength (*f*) and compositions of major electronic transitions of **3**

| Energy (eV) | Wavelength (nm) | <i>f</i> | Major contributions*                                                                                                                          |
|-------------|-----------------|----------|-----------------------------------------------------------------------------------------------------------------------------------------------|
| 0.9519      | 1302.49         | 0.05100  | Hb → Lb 50.4%, Ha → La 50.4%                                                                                                                  |
| 1.8567      | 667.77          | 0.05700  | Hb-1 → Lb 49.2%, Ha-1 → La 49.2%                                                                                                              |
| 2.5600      | 484.31          | 0.04850  | Hb → Lb+1 25.5%, Ha → La+1 25.5%,<br>Ha-3 → La 13.9%, Hb-3 → Lb 13.9%,<br>Ha-4 → La 6.9%, Hb-4 → Lb 6.9%                                      |
| 2.5708      | 482.28          | 0.03290  | Ha-2 → La 29.1%, Hb-2 → Lb 29.1%,<br>Hb → Lb+1 13.5%, Ha → La+1 13.5%                                                                         |
| 2.5995      | 476.95          | 0.00750  | Ha-2 → La 18.1%, Hb-2 → Lb 18.1%,<br>Hb-4 → Lb 11.8%, Ha-4 → La 11.8%,<br>Ha-3 → La 10.5%, Hb-3 → Lb 10.5%,<br>Hb → Lb+1 8.1%, Ha → La+1 8.1% |
| 2.7258      | 454.85          | 0.00170  | Hb-3 → Lb 22.7%, Ha-3 → La 22.7%,<br>Hb-4 → Lb 22.3%, Ha-4 → La 22.3%                                                                         |
| 2.8552      | 434.24          | 0.00020  | Ha-5 → La 44.8%, Hb-5 → Lb 44.8%                                                                                                              |
| 2.8735      | 431.47          | 0.00020  | Hb-6 → Lb 49.1%, Ha-6 → La 49.1%                                                                                                              |
| 3.1356      | 395.41          | 0.14130  | Ha → La+2 39.8%, Hb → Lb+2 39.8%                                                                                                              |
| 3.2949      | 376.29          | 0.01020  | Hb → Lb+3 33.2%, Ha → La+3 33.2%,<br>Ha-7 → La 10.4%, Hb-7 → Lb 10.4%                                                                         |

\*Ha: HOMO (α); Hb: HOMO (β); La: LUMO (α); Lb: LUMO (β)

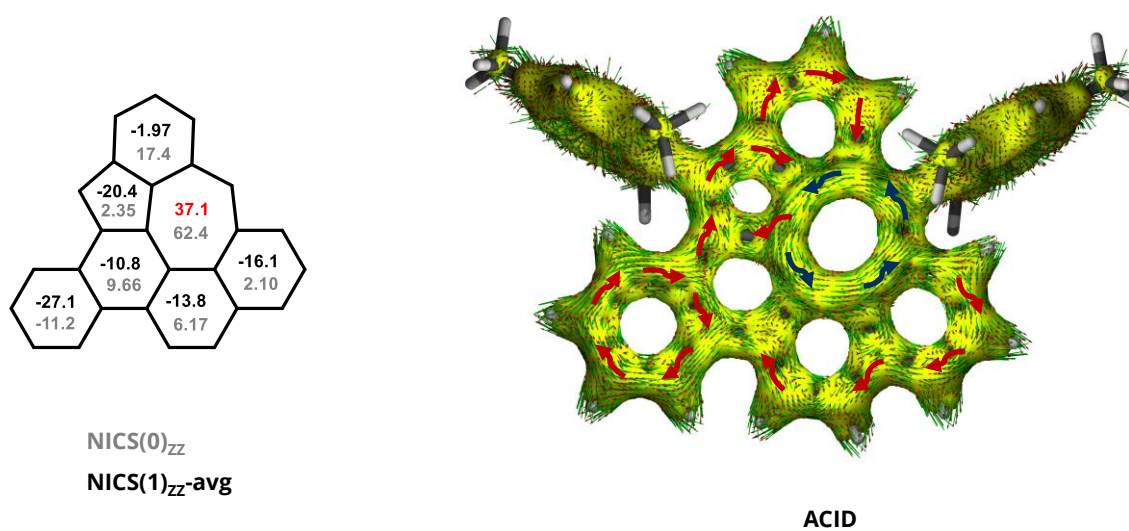

**Figure S26.** Calculated NICS and ACID plots of **3** at the level of UB3LYP/6-311+G (d, 2p) (D3BJ)

## 6. Mass and NMR Spectra

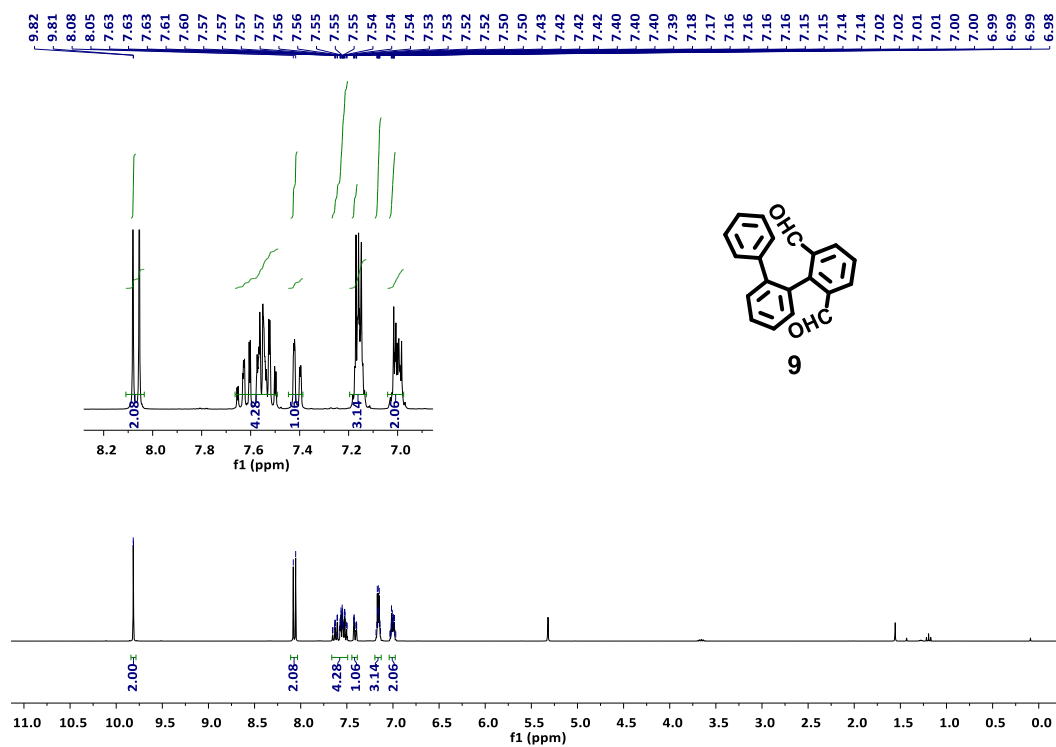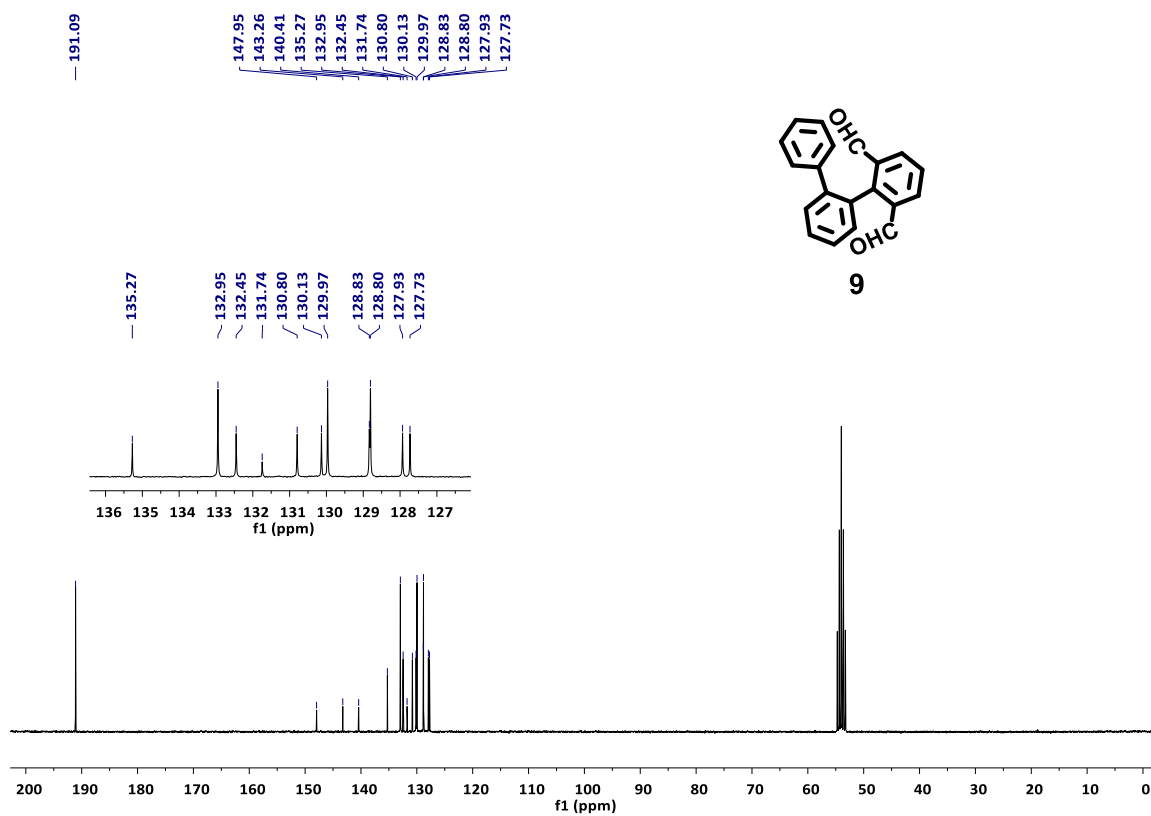



## Qualitative Compound Report

|                        |                      |                        |                                                       |
|------------------------|----------------------|------------------------|-------------------------------------------------------|
| Data File              | TLH-1.004-00.d       | Sample Name            | TLH-1.004                                             |
| Sample Type            | Sample               | Position               | Vial 48                                               |
| Instrument Name        | Instrument 1         | User Name              |                                                       |
| Acq Method             | APCI-1-2-Ac/Ni-pos.m | Acquired Time          | 11/4/2021 11:08:06 AM                                 |
| IRM Calibration Status | Success              | DA Method              | default.m                                             |
| Comment                | C20H14O2             | Info.                  | M 286.09938                                           |
| Sample Group           |                      | Acquisition SW Version | 6200 series TOF/6500 series Q-TOF B.06.01 (B6172 SP1) |
| Stream Name            | LC 1                 |                        |                                                       |

## Compound Table

| Compound Label | RT    | Mass      | Abund | Formula  | Tgt Mass  | Diff (ppm) |
|----------------|-------|-----------|-------|----------|-----------|------------|
| Cpd 1: 2.202   | 2.202 | 286.09917 | 814   | C20H14O2 | 286.09938 | -0.72      |

MS Zoomed Spectrum

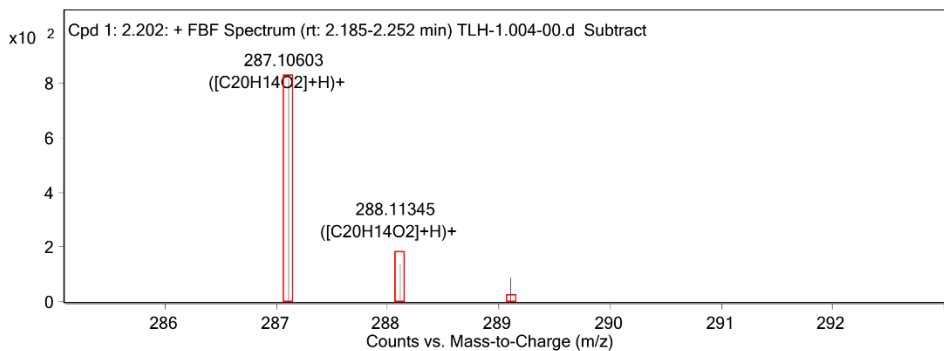

## MS Spectrum Peak List

| m/z       | z | Abund  | Formula  | Ion                |
|-----------|---|--------|----------|--------------------|
| 287.10603 | 1 | 814.27 | C20H14O2 | (M+H) <sup>+</sup> |
| 288.11345 | 1 | 135.66 | C20H14O2 | (M+H) <sup>+</sup> |
| 289.11115 | 1 | 86.7   | C20H14O2 | (M+H) <sup>+</sup> |

--- End Of Report ---

Figure S29. Qualitative compound report of HR-ESI-MS (positive mode) for **9**.

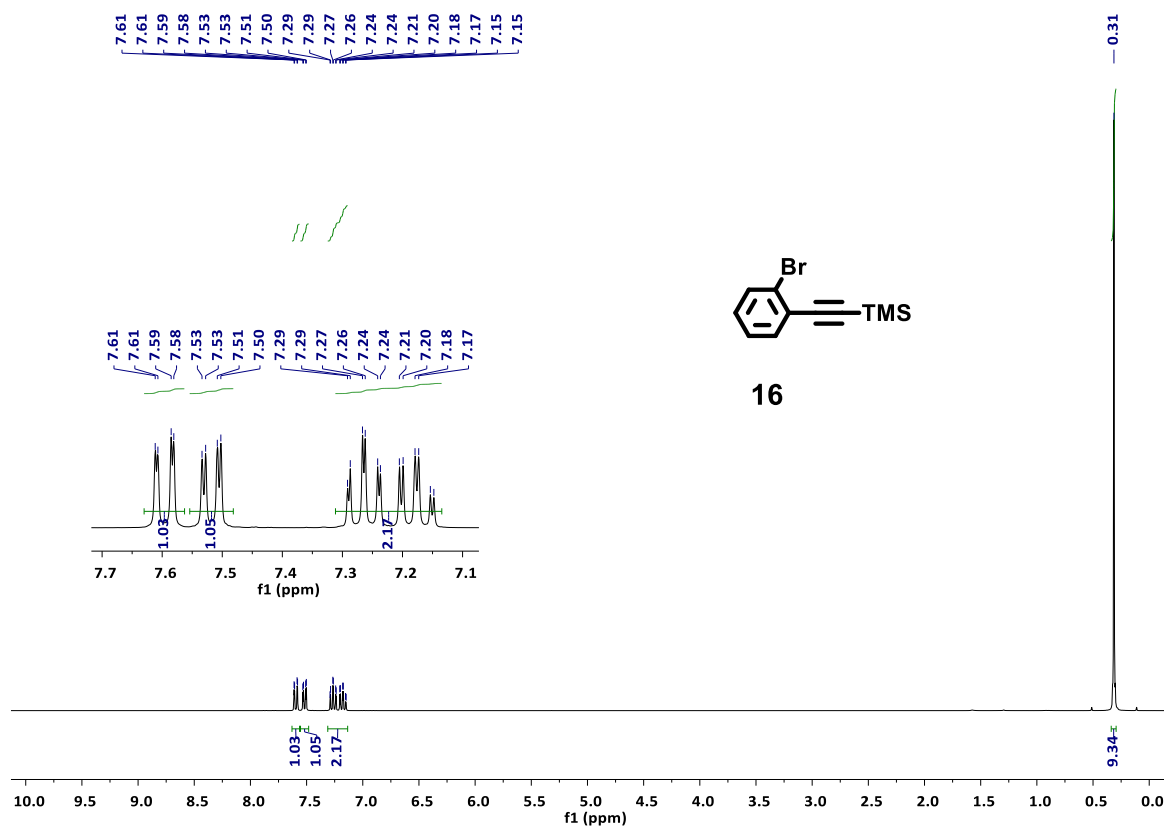

Figure S30.  $^1\text{H}$  NMR spectrum of **16** dissolved in  $\text{CDCl}_3$ , 300 MHz, 296 K.

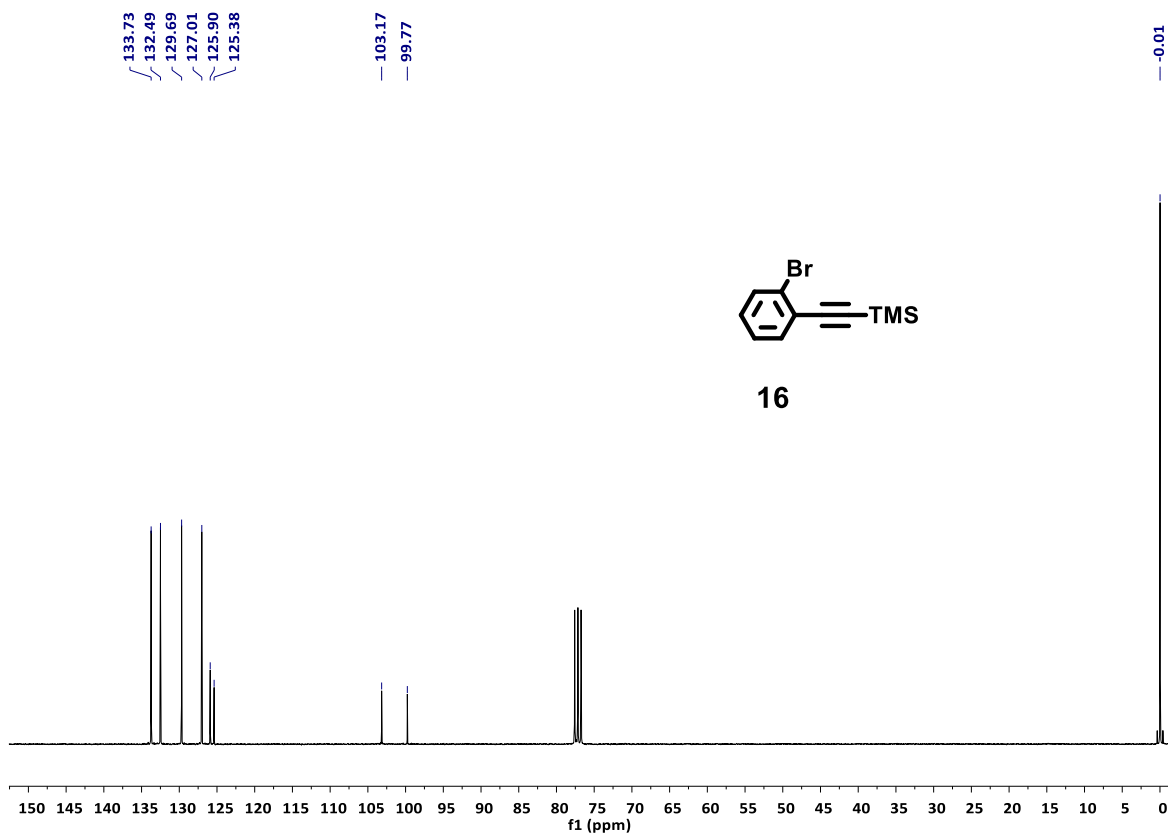

Figure S31.  $^{13}\text{C}$  NMR spectrum of **16** dissolved in  $\text{CDCl}_3$ , 75 MHz, 296 K.

## Qualitative Compound Report

|                        |                      |                        |                                                       |
|------------------------|----------------------|------------------------|-------------------------------------------------------|
| Data File              | F4054-00.d           | Sample Name            | F4054                                                 |
| Sample Type            | Sample               | Position               | Vial 11                                               |
| Instrument Name        | Instrument 1         | User Name              |                                                       |
| Acq Method             | APCI-1-2-Ac/Ni-pos.m | Acquired Time          | 5/27/2021 11:01:54 AM                                 |
| IRM Calibration Status | Success              | DA Method              | default.m                                             |
| Comment                | C11H13BrSi           | Info.                  | M 253.99499                                           |
| Sample Group           |                      | Acquisition SW Version | 6200 series TOF/6500 series Q-TOF B.06.01 (B6172 SP1) |
| Stream Name            | LC 1                 |                        |                                                       |

## Compound Table

| Compound Label       | RT    | Mass      | Abund | Formula       | Tgt Mass  | Diff (ppm) |
|----------------------|-------|-----------|-------|---------------|-----------|------------|
| Cpd 1: C11 H13 Br Si | 1.152 | 251.99578 | 27003 | C11 H13 Br Si | 251.99699 | -4.79      |

## MS Zoomed Spectrum

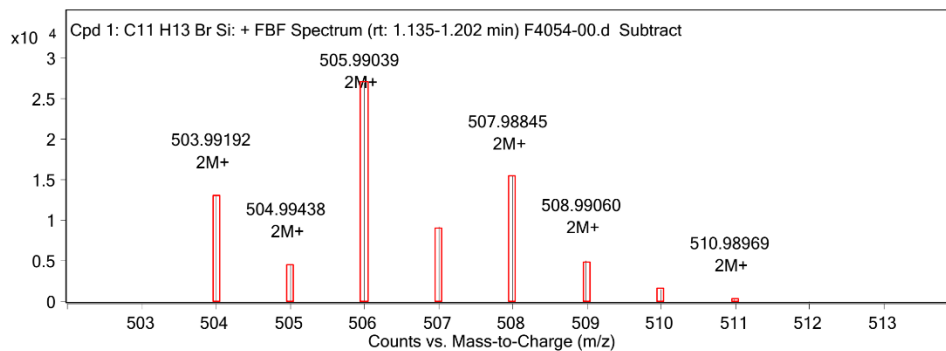

## MS Spectrum Peak List

| m/z       | z | Abund    | Formula    | Ion |
|-----------|---|----------|------------|-----|
| 503.99192 | 1 | 13083.74 | C11H13BrSi | 2M+ |
| 504.99438 | 1 | 4524.43  | C11H13BrSi | 2M+ |
| 505.99039 | 1 | 27003.11 | C11H13BrSi | 2M+ |
| 506.99283 | 1 | 9189.4   | C11H13BrSi | 2M+ |
| 507.98845 | 1 | 15455.33 | C11H13BrSi | 2M+ |
| 508.9906  | 1 | 5036.67  | C11H13BrSi | 2M+ |
| 509.98943 | 1 | 1542.61  | C11H13BrSi | 2M+ |
| 510.98969 | 1 | 328.24   | C11H13BrSi | 2M+ |
| 511.99613 | 1 | 64.11    | C11H13BrSi | 2M+ |

--- End Of Report ---

Figure S32. Qualitative compound report of HR-ESI-MS (positive mode) for **16**.

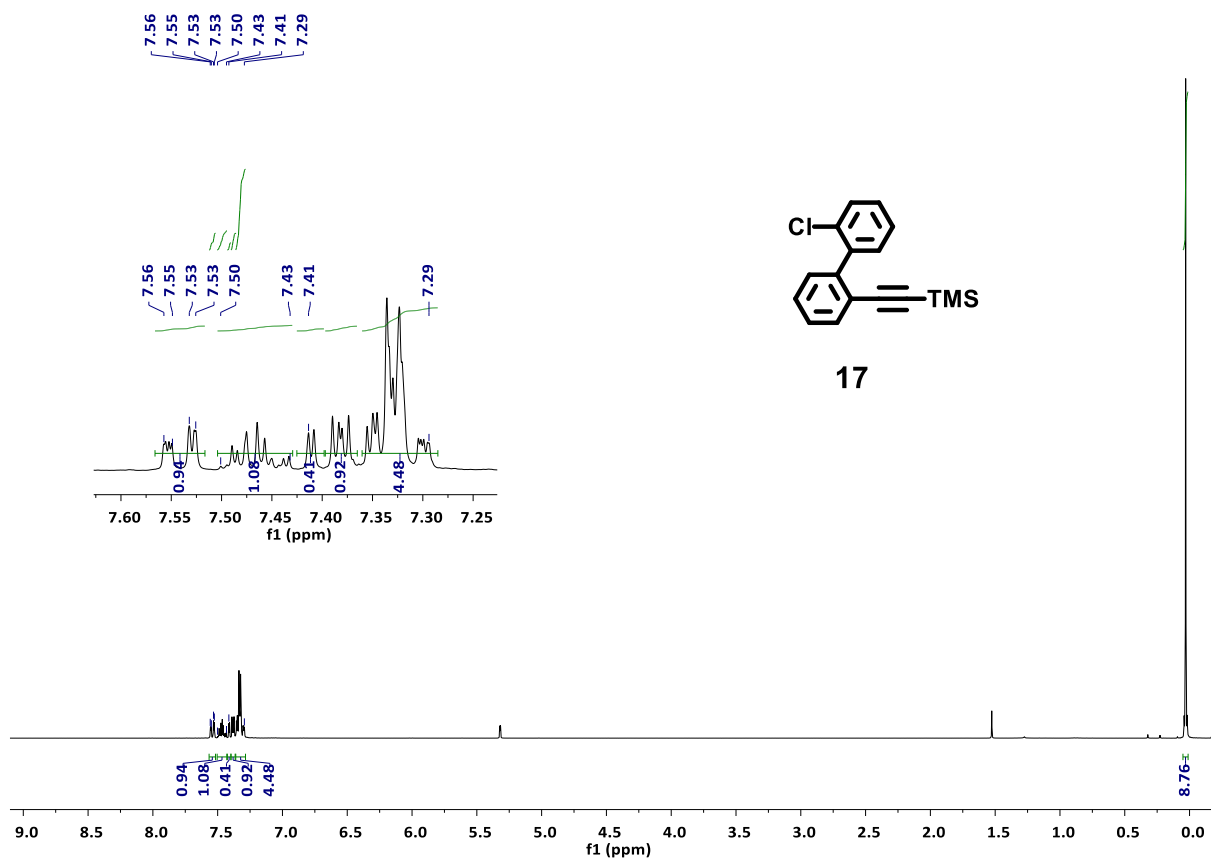

Figure S33. <sup>1</sup>H NMR spectrum of **17** dissolved in CD<sub>2</sub>Cl<sub>2</sub>, 300 MHz, 296 K.

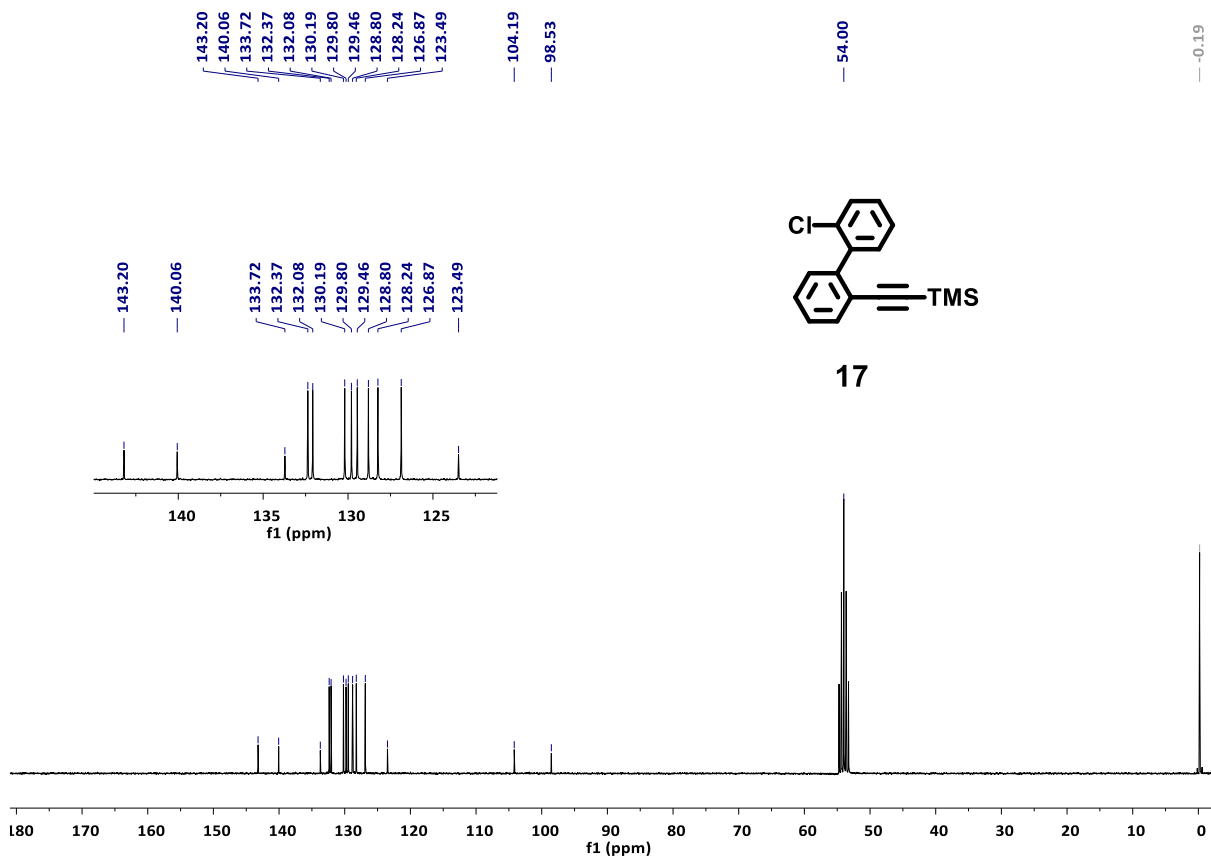

Figure S34. <sup>13</sup>C NMR spectrum of **17** dissolved in CD<sub>2</sub>Cl<sub>2</sub>, 75 MHz, 296 K.

## Qualitative Compound Report

|                        |                      |                        |                                                       |
|------------------------|----------------------|------------------------|-------------------------------------------------------|
| Data File              | F6044-00.d           | Sample Name            | F6044                                                 |
| Sample Type            | Sample               | Position               | Vial 12                                               |
| Instrument Name        | Instrument 1         | User Name              |                                                       |
| Acq Method             | APCI-1-2-Ac/Ni-pos.m | Acquired Time          | 5/27/2021 11:05:00 AM                                 |
| IRM Calibration Status | Success              | DA Method              | default.m                                             |
| Comment                | C17H17ClSi           | Info.                  | M 284.0788                                            |
| Sample Group           |                      | Acquisition SW Version | 6200 series TOF/6500 series Q-TOF B.06.01 (B6172 SP1) |
| Stream Name            | LC 1                 |                        |                                                       |

## Compound Table

| Compound Label       | RT    | Mass      | Abund | Formula       | Tgt Mass | Diff (ppm) |
|----------------------|-------|-----------|-------|---------------|----------|------------|
| Cpd 1: C17 H17 Cl Si | 1.187 | 284.07726 | 41516 | C17 H17 Cl Si | 284.0788 | -5.43      |

## MS Zoomed Spectrum

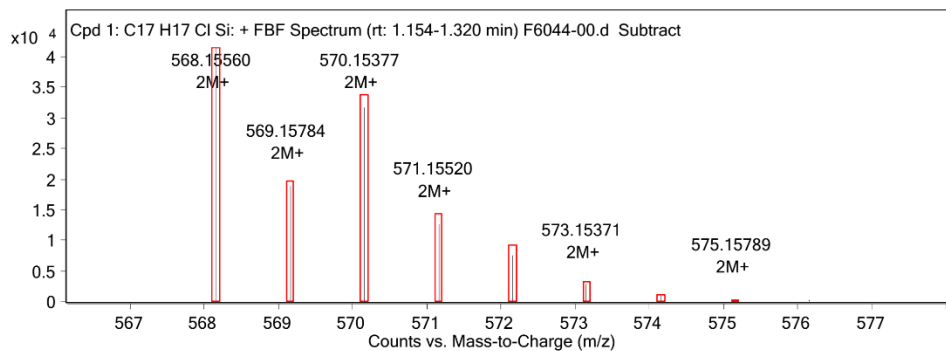

## MS Spectrum Peak List

| m/z       | z | Abund    | Formula    | Ion |
|-----------|---|----------|------------|-----|
| 568.1556  | 1 | 41516.41 | C17H17ClSi | 2M+ |
| 569.15784 | 1 | 18825.55 | C17H17ClSi | 2M+ |
| 570.15377 | 1 | 31654.14 | C17H17ClSi | 2M+ |
| 571.1552  | 1 | 12709.45 | C17H17ClSi | 2M+ |
| 572.15219 | 1 | 7606.07  | C17H17ClSi | 2M+ |
| 573.15371 | 1 | 2712.66  | C17H17ClSi | 2M+ |
| 574.15317 | 1 | 839.67   | C17H17ClSi | 2M+ |
| 575.15789 | 1 | 266.19   | C17H17ClSi | 2M+ |
| 576.15399 | 1 | 156.25   | C17H17ClSi | 2M+ |

--- End Of Report ---

Figure S35. Qualitative compound report of HR-ESI-MS (positive mode) for 17.

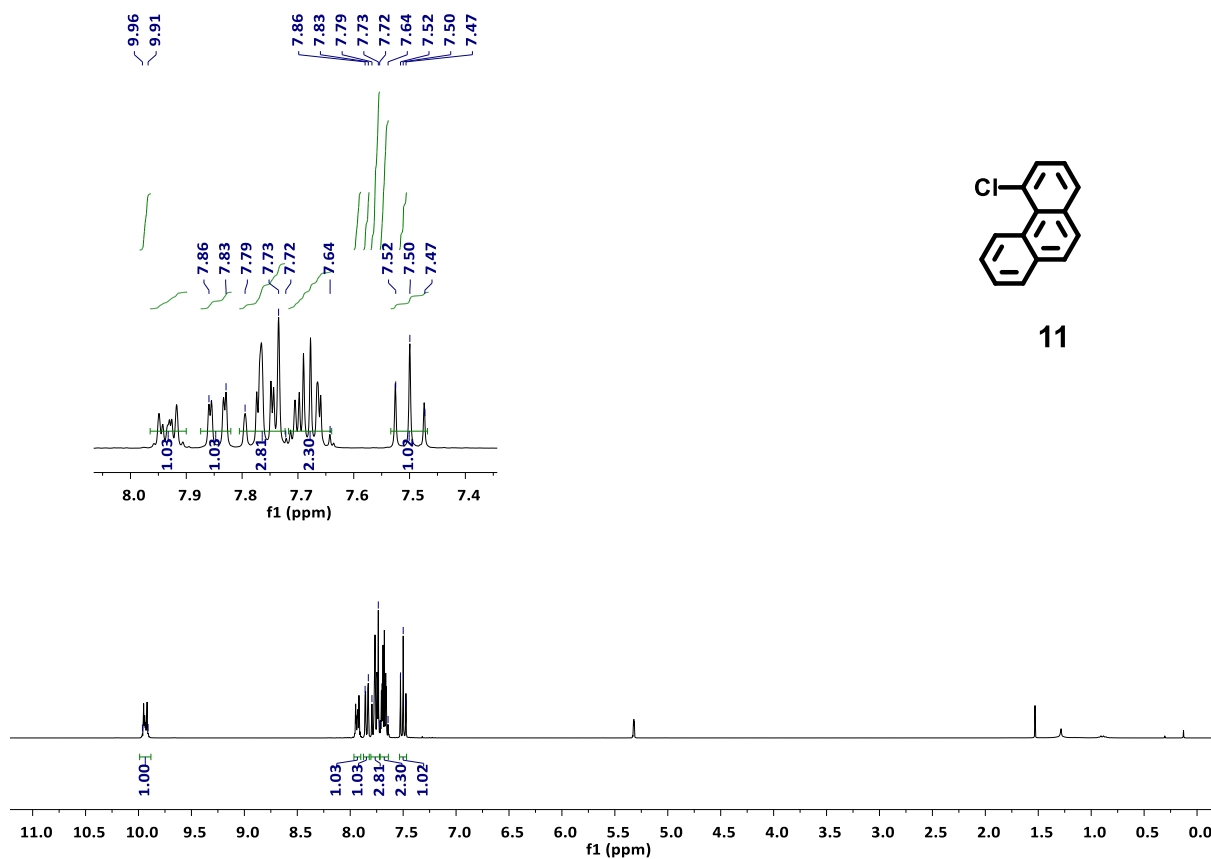

Figure S36. <sup>1</sup>H NMR spectrum of **11** dissolved in CD<sub>2</sub>Cl<sub>2</sub>, 300 MHz, 296 K.

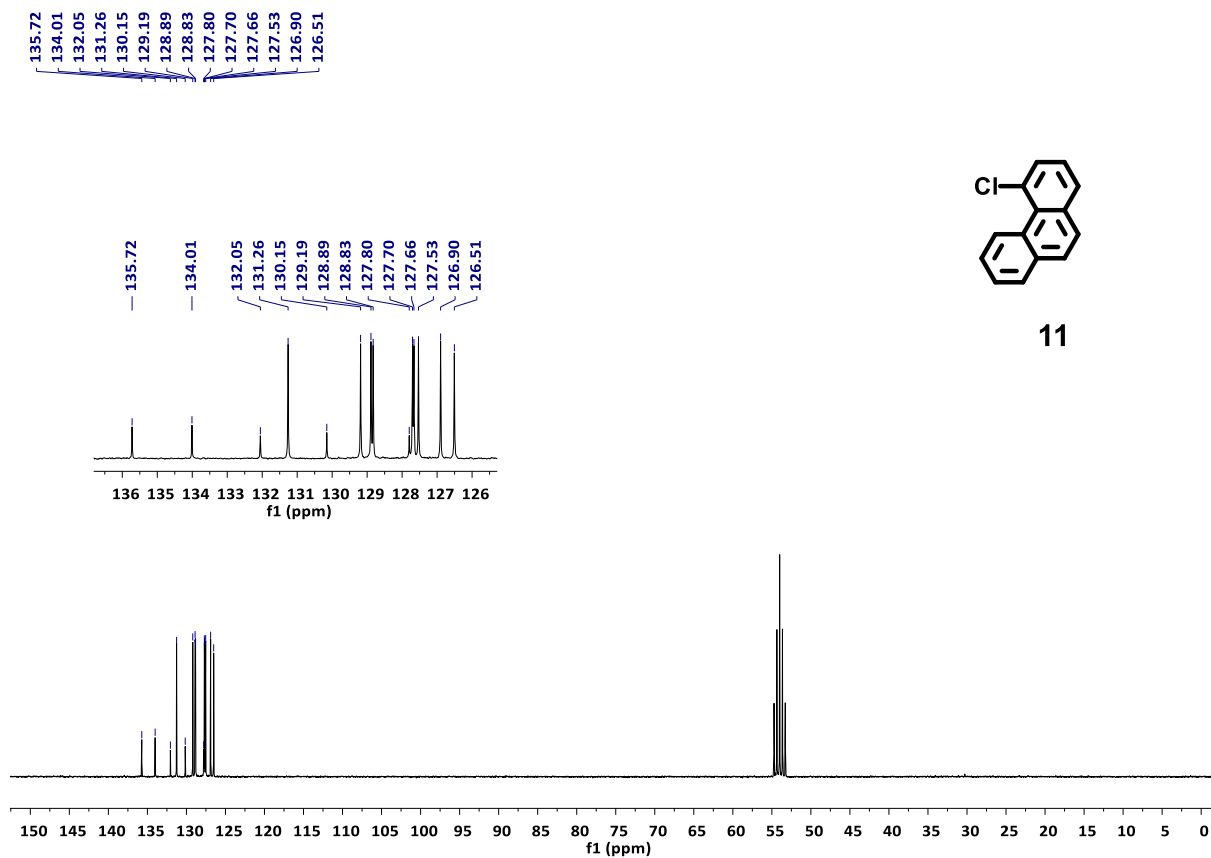

Figure S37. <sup>13</sup>C NMR spectrum of **11** dissolved in CD<sub>2</sub>Cl<sub>2</sub>, 75 MHz, 296 K.

## Qualitative Compound Report

|                        |                      |                        |                                                       |
|------------------------|----------------------|------------------------|-------------------------------------------------------|
| Data File              | F5028-00.d           | Sample Name            | F5028                                                 |
| Sample Type            | Sample               | Position               | Vial 13                                               |
| Instrument Name        | Instrument 1         | User Name              |                                                       |
| Acq Method             | APCI-1-2-Ac/Ni-pos.m | Acquired Time          | 5/27/2021 11:08:07 AM                                 |
| IRM Calibration Status | Success              | DA Method              | default.m                                             |
| Comment                | C14H9Cl              | Info.                  | M 212.03928                                           |
| Sample Group           |                      | Acquisition SW Version | 6200 series TOF/6500 series Q-TOF B.06.01 (B6172 SP1) |
| Stream Name            | LC 1                 |                        |                                                       |

## Compound Table

| Compound Label   | RT    | Mass      | Abund  | Formula   | Tgt Mass  | Diff (ppm) |
|------------------|-------|-----------|--------|-----------|-----------|------------|
| Cpd 1: C14 H9 Cl | 1.187 | 212.03914 | 206743 | C14 H9 Cl | 212.03928 | -0.64      |

## MS Zoomed Spectrum

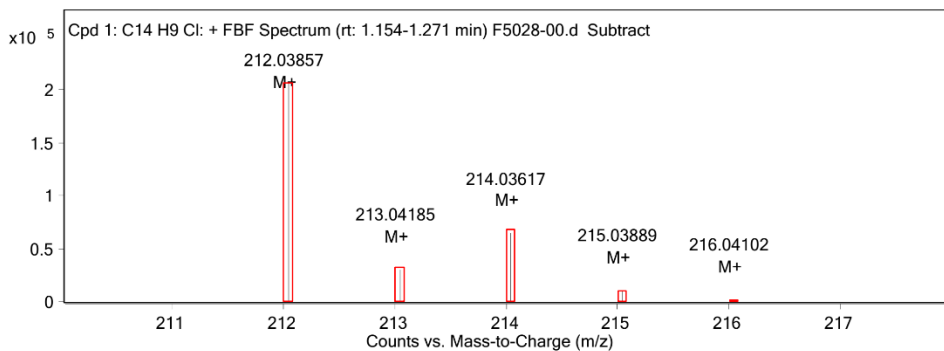

## MS Spectrum Peak List

| m/z       | z | Abund     | Formula | Ion |
|-----------|---|-----------|---------|-----|
| 212.03857 | 1 | 206743.19 | C14H9Cl | M+  |
| 213.04185 | 1 | 29707.85  | C14H9Cl | M+  |
| 214.03617 | 1 | 64096.11  | C14H9Cl | M+  |
| 215.03889 | 1 | 10246.12  | C14H9Cl | M+  |
| 216.04102 | 1 | 1464.14   | C14H9Cl | M+  |

--- End Of Report ---

Figure S38. Qualitative compound report of HR-ESI-MS (positive mode) for **11**.

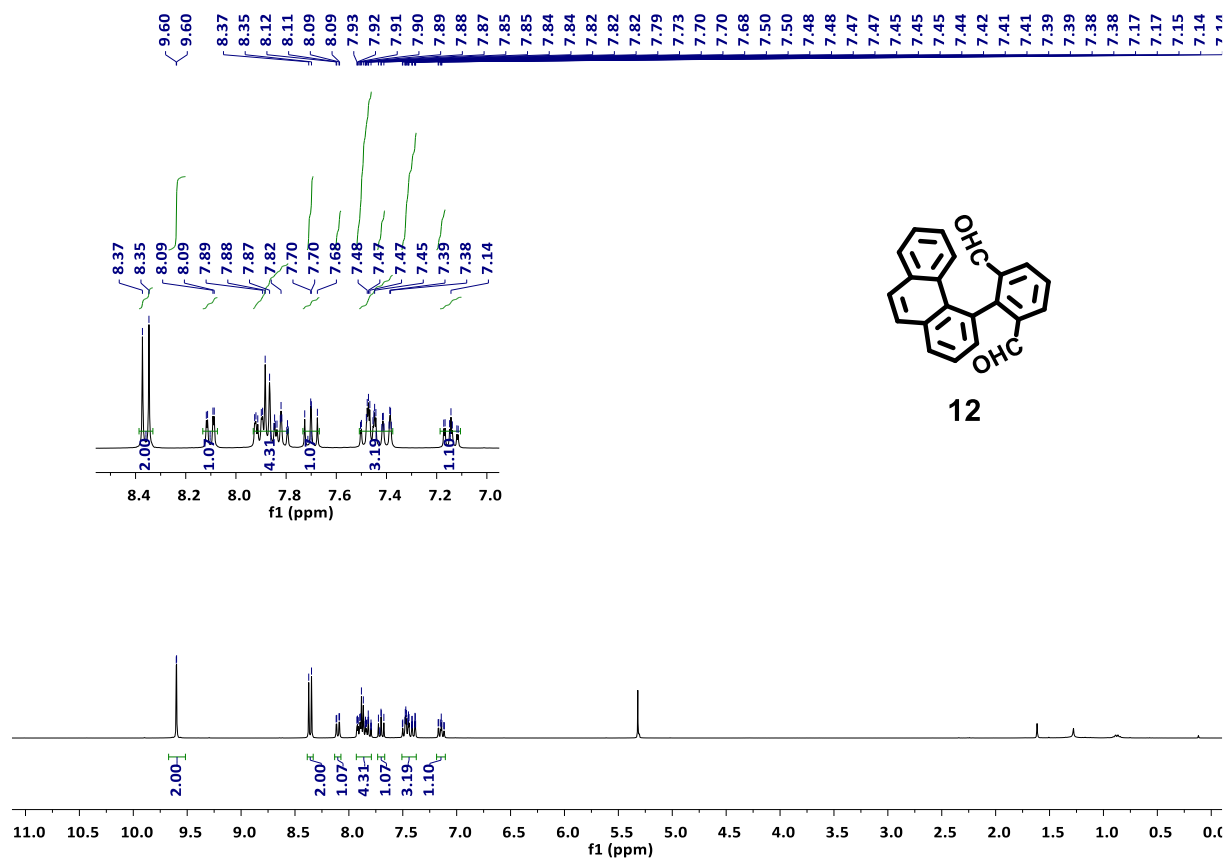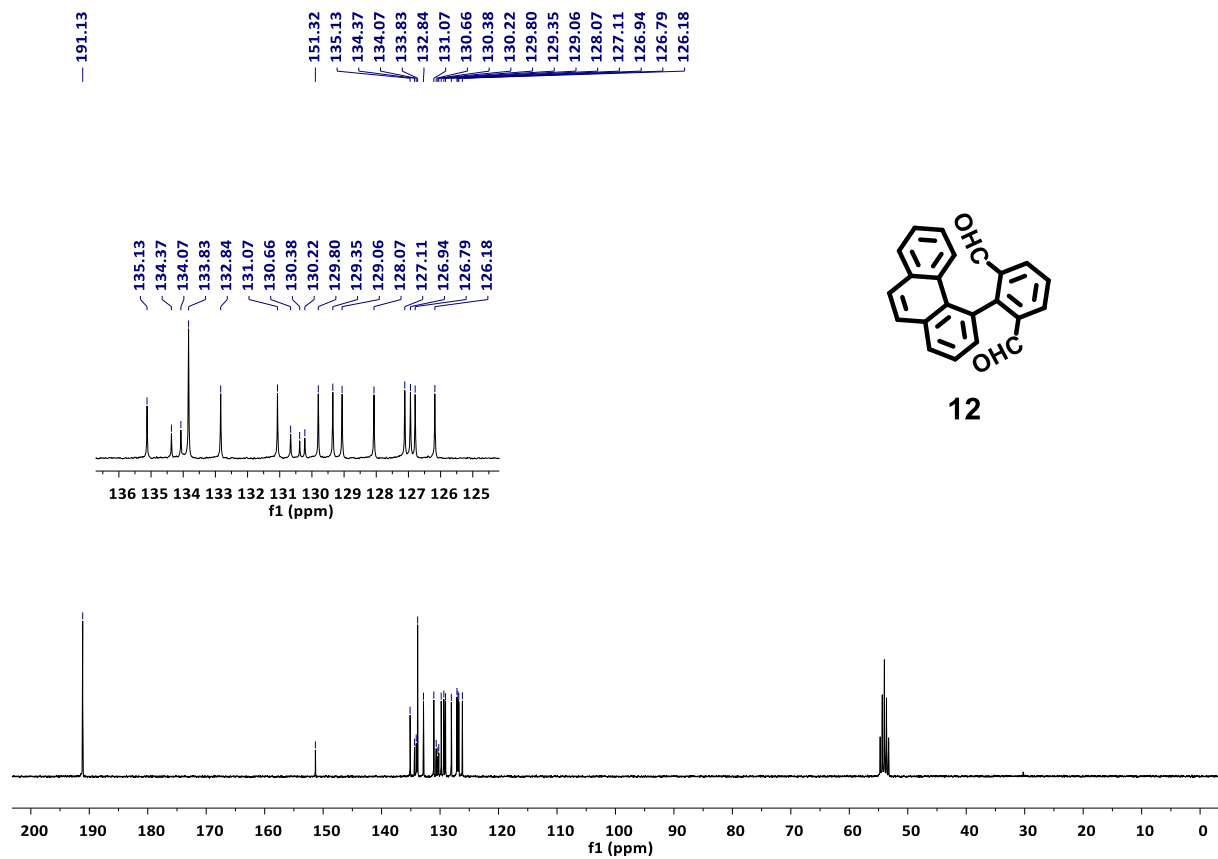



## Qualitative Compound Report

|                               |                      |                               |                                                       |
|-------------------------------|----------------------|-------------------------------|-------------------------------------------------------|
| <b>Data File</b>              | F4088-10.d           | <b>Sample Name</b>            | F4088                                                 |
| <b>Sample Type</b>            | Sample               | <b>Position</b>               | Vial 49                                               |
| <b>Instrument Name</b>        | Instrument 1         | <b>User Name</b>              |                                                       |
| <b>Acq Method</b>             | APCI-1-2-Ac/Ni-neg.m | <b>Acquired Time</b>          | 11/5/2021 9:23:47 AM                                  |
| <b>IRM Calibration Status</b> | Success              | <b>DA Method</b>              | default.m                                             |
| <b>Comment</b>                | C22H14O2             | <b>Info.</b>                  | M 310.09938                                           |
| <b>Sample Group</b>           |                      | <b>Acquisition SW Version</b> | 6200 series TOF/6500 series Q-TOF B.06.01 (B6172 SP1) |
| <b>Stream Name</b>            | LC 1                 |                               |                                                       |

## Compound Table

| Compound Label | RT    | Mass      | Abund | Formula    | Tgt Mass  | Diff (ppm) |
|----------------|-------|-----------|-------|------------|-----------|------------|
| Cpd 1: 1.333   | 1.333 | 310.09941 | 35734 | C22 H14 O2 | 310.09938 | 0.1        |

MS Zoomed Spectrum

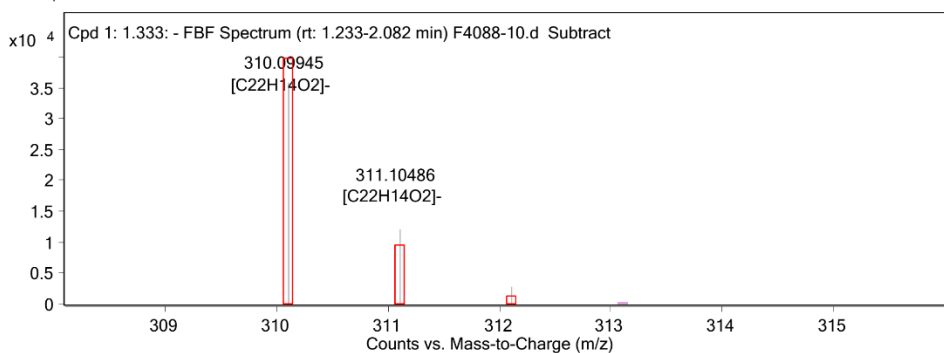

## MS Spectrum Peak List

| m/z       | z | Abund    | Formula  | Ion |
|-----------|---|----------|----------|-----|
| 310.09945 | 1 | 35734.46 | C22H14O2 | M-  |
| 311.10486 | 1 | 12031.57 | C22H14O2 | M-  |
| 312.10632 | 1 | 2715.82  | C22H14O2 | M-  |

--- End Of Report ---

Figure S41. Qualitative compound report of HR-ESI-MS (negative mode) for **12**.

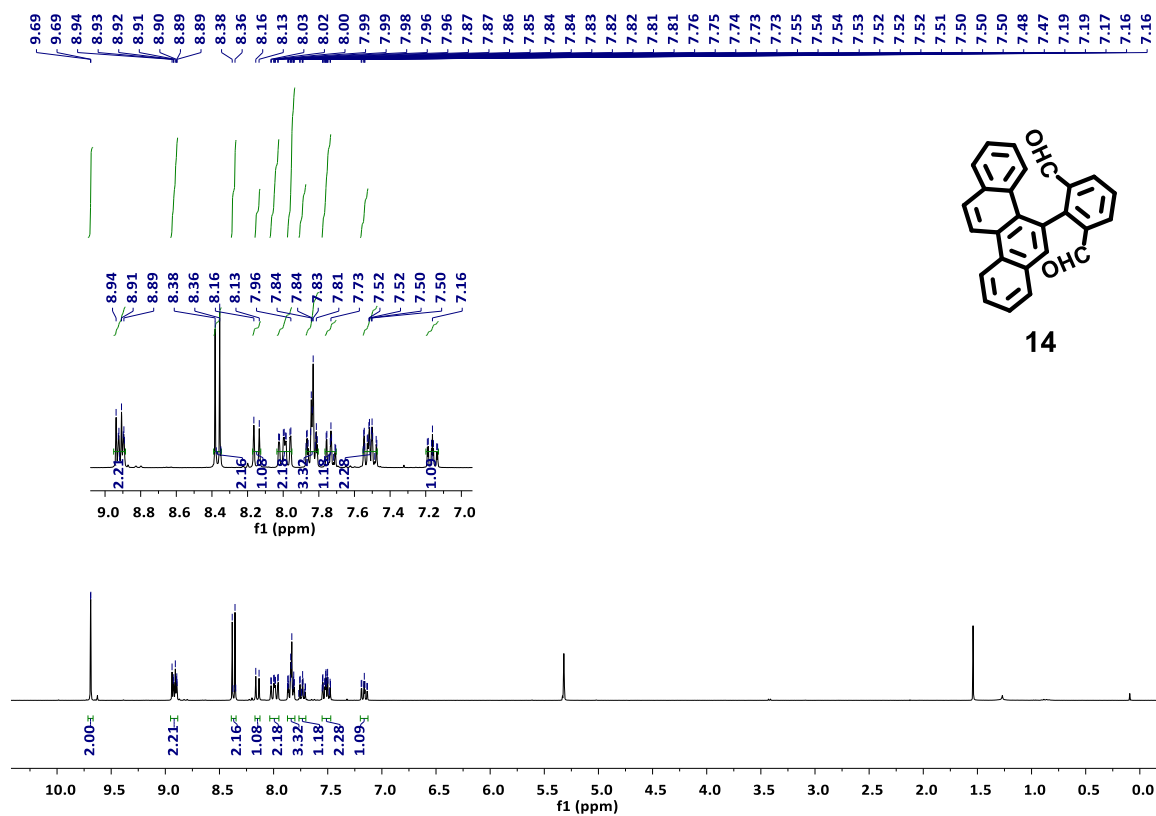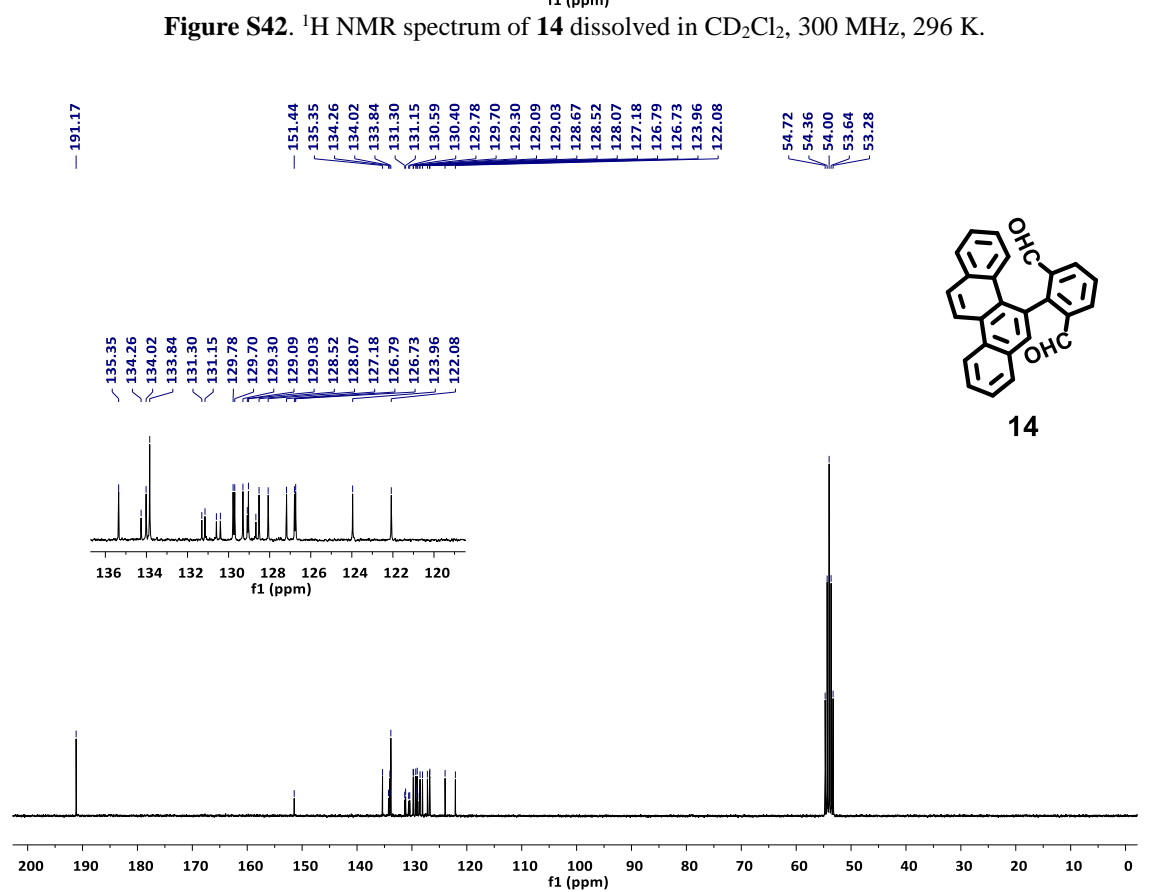

## Qualitative Compound Report

|                        |                      |                        |                                                       |
|------------------------|----------------------|------------------------|-------------------------------------------------------|
| Data File              | F4069-01.d           | Sample Name            | F4069                                                 |
| Sample Type            | Sample               | Position               | Vial 50                                               |
| Instrument Name        | Instrument 1         | User Name              |                                                       |
| Acq Method             | APCI-1-2-Ac/Ni-pos.m | Acquired Time          | 11/5/2021 1:59:01 PM                                  |
| IRM Calibration Status | Success              | DA Method              | default.m                                             |
| Comment                | C26H16O2             |                        |                                                       |
| Sample Group           |                      | Info.                  | M 360.11503                                           |
| Stream Name            | LC 1                 | Acquisition SW Version | 6200 series TOF/6500 series Q-TOF B.06.01 (B6172 SP1) |

## Compound Table

| Compound Label | RT    | Mass      | Abund  | Formula    | Tgt Mass  | Diff (ppm) |
|----------------|-------|-----------|--------|------------|-----------|------------|
| Cpd 1: 1.286   | 1.286 | 360.11407 | 590192 | C26 H16 O2 | 360.11503 | -2.65      |

MS Zoomed Spectrum

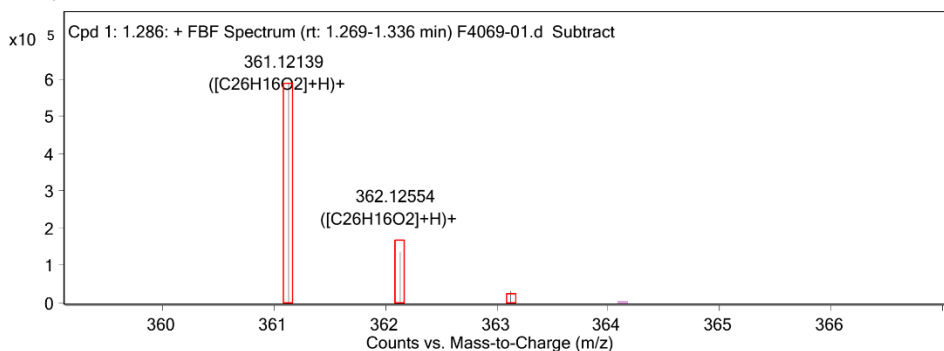

## MS Spectrum Peak List

| m/z       | z | Abund     | Formula  | Ion                |
|-----------|---|-----------|----------|--------------------|
| 361.12139 | 1 | 590192.13 | C26H16O2 | (M+H) <sup>+</sup> |
| 362.12554 | 1 | 138057.09 | C26H16O2 | (M+H) <sup>+</sup> |
| 363.12385 | 1 | 33090.02  | C26H16O2 | (M+H) <sup>+</sup> |

--- End Of Report ---

Figure S44. Qualitative compound report of HR-ESI-MS (positive mode) for 14.

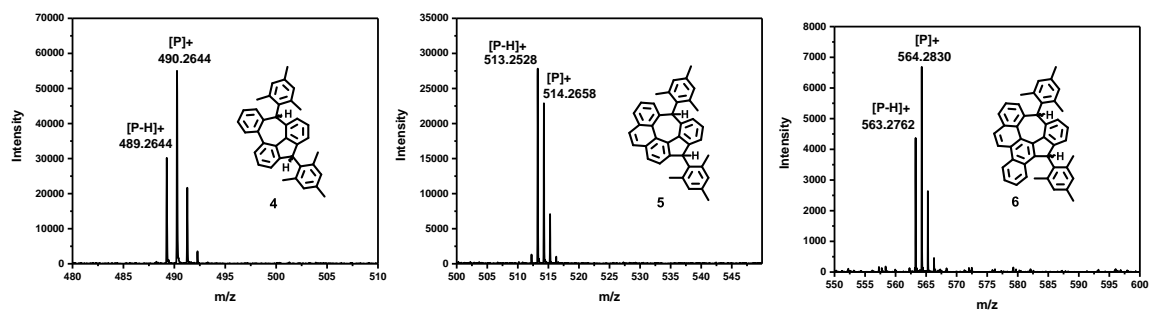

**Figure S45.** Liquid-state HR-MALDI-TOF-MS spectra of **4-6** (matrix: DCTB). Spectra show some  $[P-H]$  peaks during MALDI measurements. Structure **4-6** can further be confirmed by their NMR and single crystal analysis.

NMR data and spectra of **4**, **5** and **6**General considerations

The  $^1\text{H}$  and  $^{13}\text{C}$  NMR spectra of **4**, **5** and **6** are characterised by signals of up to four isomers. In these compounds, the two methine carbons present stereocenters. The methine carbons are part of a 5-membered and a 7-membered ring, respectively. Thus, four stereo isomers can be distinguished: (5-S, 7-S), (5-S, 7-R), (5-R, 7-S) and (5-R,7-R). The polycyclic structure and the sterically demanding mesityl groups seem to result in four different structures and not in enantiomeric stereoisomers.

MM2 calculations (Chem3D, version 17) for the four stereoisomers of **4** result in the following structures:

*lower energy isomers*

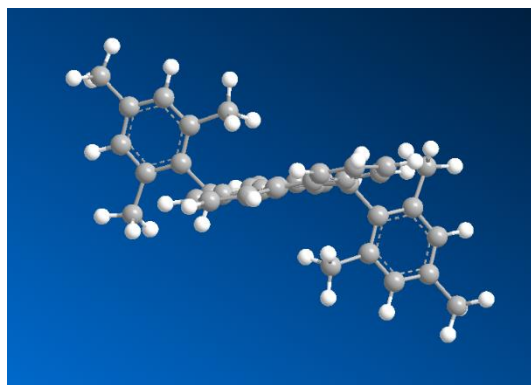

(5-R; 7-R) (~ 36.9 kcal/mol)

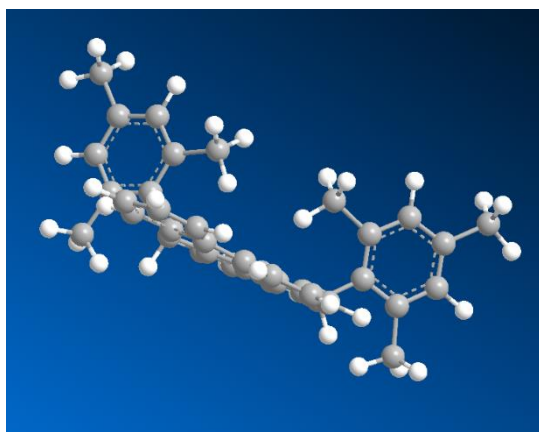

(5-S; 7-R) (~ 36.6 kcal/mol)

*higher energy isomers*

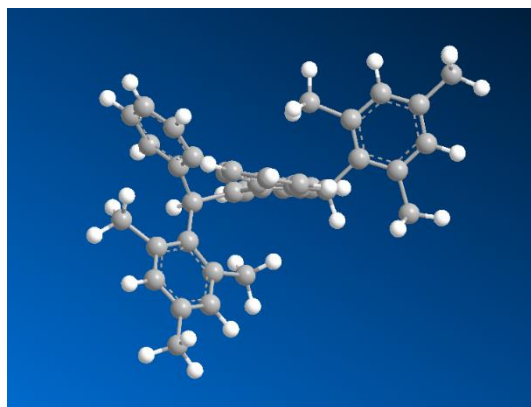

(5-S; 7-S) (~ 42.8 kcal/mol)

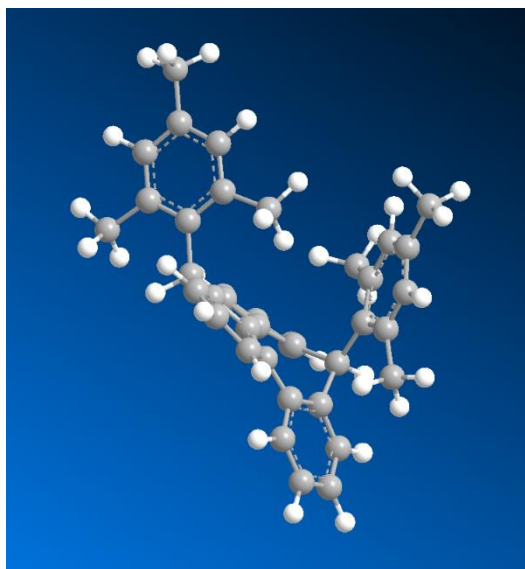

(5-R; 7-S) (~ 43.2 kcal/mol)

A detailed investigation is not the aim of the NMR studies, but it is obvious that some structures are sterically very demanding and the different content of isomers in the isomer mixture (two for **4** (55:45) and **5** (75:25); four for **6** (55: 32: 9: 4) might result from steric reasons.

It should be noted that the mesityl moiety bonded to carbon 7 (7-membered ring) can rotate fast on the NMR timescale, which leads to an equivalence of positions 22/22', 23/23' and 25/25', respectively. This does not apply to the mesityl moiety, which is attached to carbon 20 (5-membered ring). Because of slow rotation, these positions result in well separated signals.

Variable-temperature (VT) NMR experiments reveal changes in line width for mesityl signals.

NMR data and spectra of **4**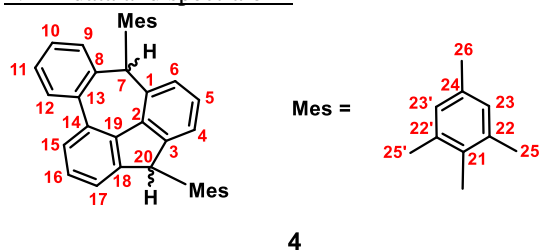Table S9. NMR data of **4**

| #                       | Major isomer (~ 55 mol%) |                 | Minor isomer (~ 45 mol%) |                 |
|-------------------------|--------------------------|-----------------|--------------------------|-----------------|
|                         | <sup>1</sup> H           | <sup>13</sup> C | <sup>1</sup> H           | <sup>13</sup> C |
| 1                       | -                        | 137.7           | -                        | 138.2           |
| 2                       | -                        | 140.5           | -                        | 141.6           |
| 3                       | -                        | 147.5           | -                        | 147.4           |
| 4                       | 7.08                     | 121.8           | 6.98 (d)                 | 122.1           |
| 5                       | 7.13                     | 127.9           | 7.08                     | 127.8           |
| 6                       | 6.94 (d)                 | 127.0           | 6.88 (d)                 | 126.4           |
| 7                       | 6.14 (s)                 | 47.7            | 6.00 (s)                 | 47.2            |
| 8                       | -                        | 140.2           | -                        | 139.8           |
| 9                       | 7.20                     | 130.3           | 7.20                     | 129.8           |
| 10                      | 7.20                     | 127.8           | 7.20                     | 127.8           |
| 11                      | 7.33                     | 127.1           | 7.33                     | 127.2           |
| 12                      | 7.77 (d)                 | 131.0           | 7.65 (d)                 | 131.1           |
| 13                      | -                        | 138.0           | -                        | 138.8           |
| 14                      | -                        | 136.1           | -                        | 136.9           |
| 15                      | 7.85 (d)                 | 126.9           | 7.79 (d)                 | 127.0           |
| 16                      | 7.42 (t)                 | 127.7           | 7.40 (t)                 | 127.3           |
| 17                      | 7.21                     | 123.2           | 7.21                     | 122.7           |
| 18                      | -                        | 146.7           | -                        | 148.8           |
| 19                      | -                        | 139.9           | -                        | 139.3           |
| 20                      | 5.53 (s)                 | 49.9            | 5.63 (s)                 | 50.0            |
| <b>Mes at carbon 7</b>  |                          |                 |                          |                 |
| 21                      | -                        | 135.5           | -                        | 134.3           |
| 22 = 22'                | -                        | 138.5           | -                        | 138.7           |
| 23 = 23'                | 7.07 (s)                 | 130.4           | 7.09 (s)                 | 130.4           |
| 24                      | -                        | 136.6           | -                        | 136.6           |
| 25 = 25'                | 2.26 (s)                 | 22.5            | 2.22 (s)                 | 22.6            |
| 26                      | 2.38 (s)                 | 20.9            | 2.40 (s)                 | 20.95           |
| <b>Mes at carbon 20</b> |                          |                 |                          |                 |
| 21                      | -                        | 134.1           | -                        | 134.4           |
| 22                      | -                        | 138.05          | -                        | 138.2           |
| 22'                     | -                        | 138.0           | -                        | 137.8           |
| 23                      | 7.05 (s)                 | 129.2           | 7.04 (s)                 | 129.1           |
| 23'                     | 6.66 (s)                 | 130.7           | 6.65 (s)6                | 130.8           |
| 24                      | -                        | 136.5           | -                        | 136.5           |
| 25                      | 2.70 (s)                 | 21.8            | 2.68 (s)                 | 21.7            |
| 25'                     | 1.20 (s)                 | 18.9            | 0.98 (s)                 | 18.4            |
| 26                      | 2.28 (s)                 | 20.8            | 2.28 (s)                 | 20.8            |

Note: The multiplicity is not reported when signals are overlapped.

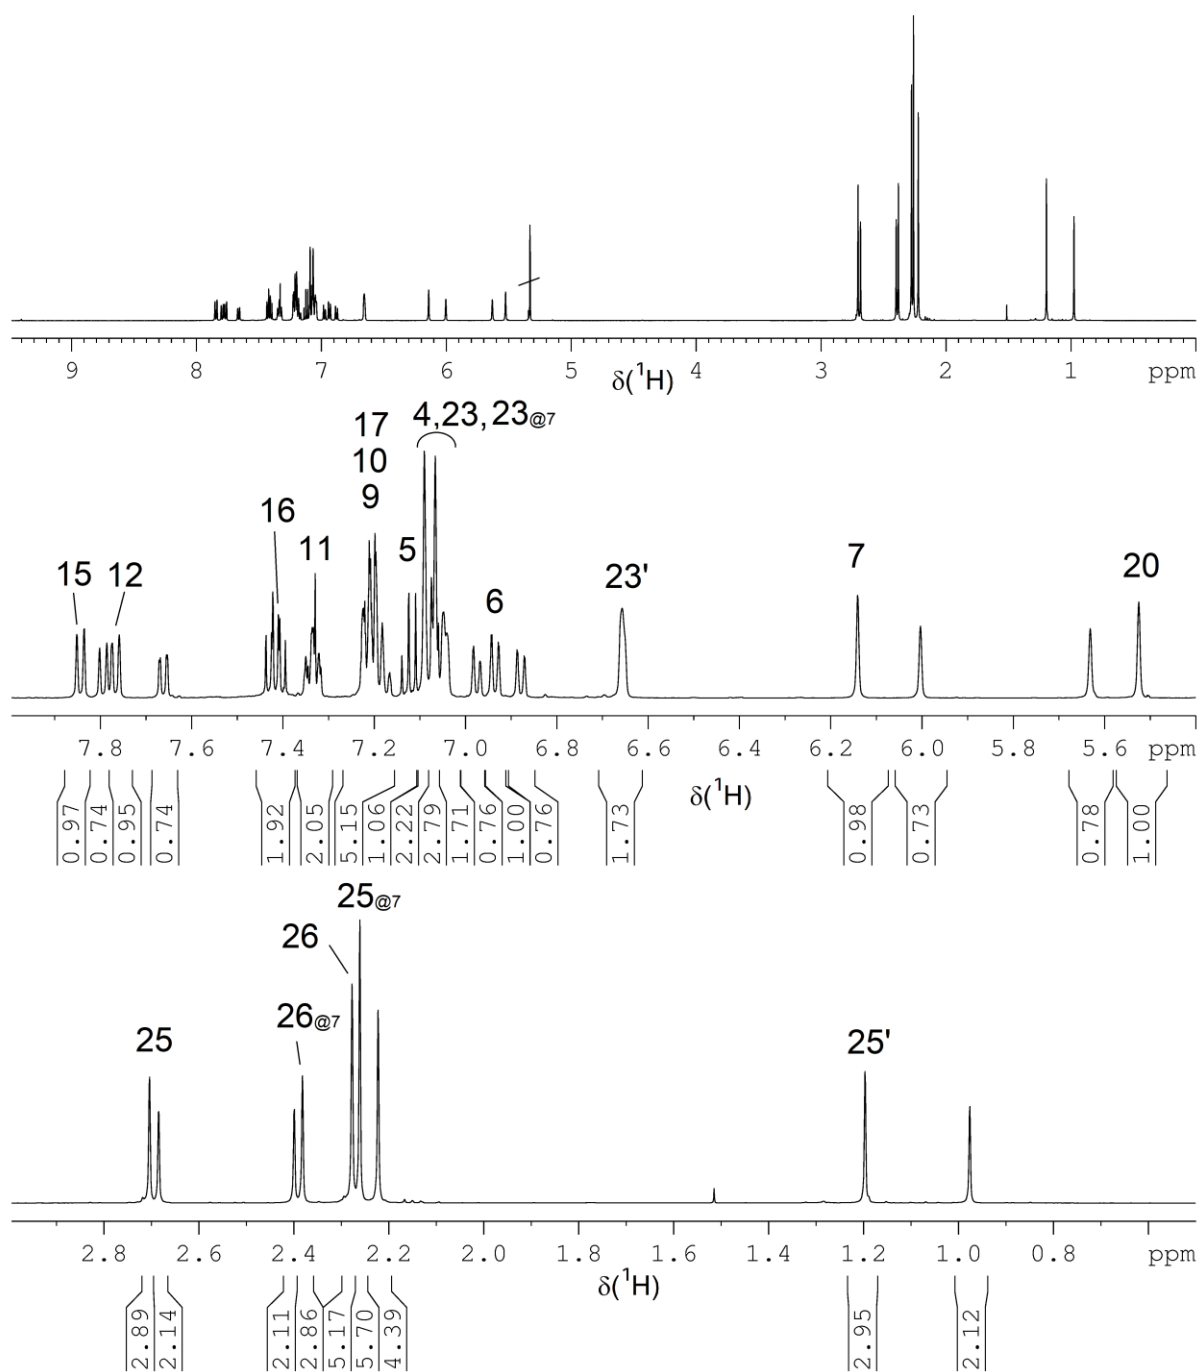

**Figure S46.**  $^1\text{H}$  NMR spectrum and selected regions of **4** ( $\text{CD}_2\text{Cl}_2$ ; 500 MHz;  $30^\circ\text{C}$ ) with signal assignment for the major isomer. Note: The integral values can deviate from the expected ones due to signal overlap with signals of minor isomer.  $\text{H}_{23/23'}$ ,  $\text{H}_{25/25'}$  and  $\text{H}_{26}$  of the mesityl moiety bonded to  $\text{CH}_{20}$  are not marked with @20.

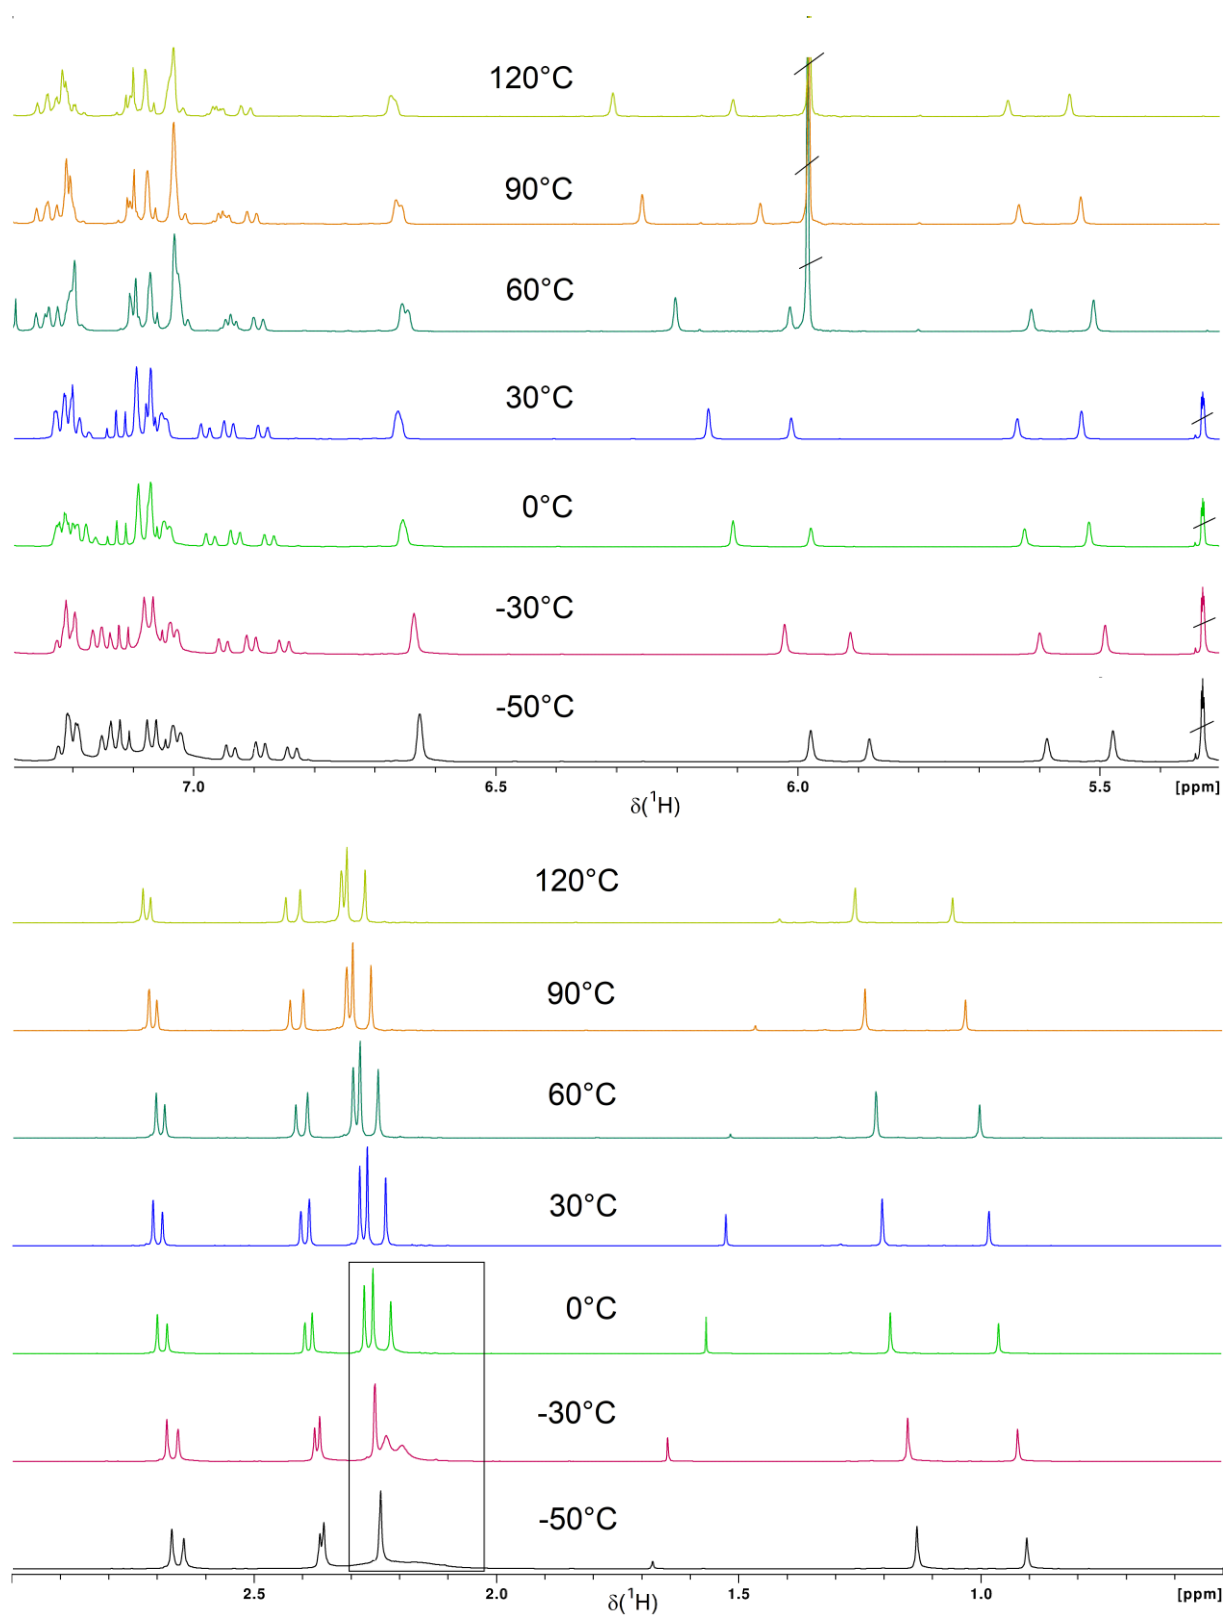

**Figure S47.**  $^1\text{H}$  NMR spectra (regions) of **4** at different temperatures ( $\text{CD}_2\text{Cl}_2$  @  $-50$  to  $30^\circ\text{C}$ ;  $\text{C}_2\text{D}_2\text{Cl}_2$  @  $60$ - $120^\circ\text{C}$ ;  $500$  MHz). The box marks signals with changing line width.



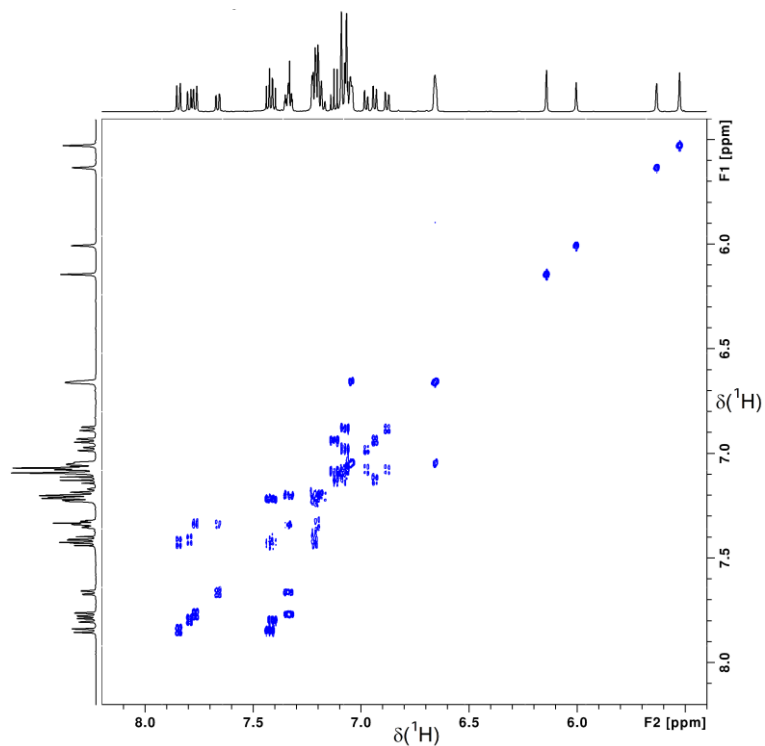

**Figure S48.** COSY spectrum (region) of **4** ( $\text{CD}_2\text{Cl}_2$ ).

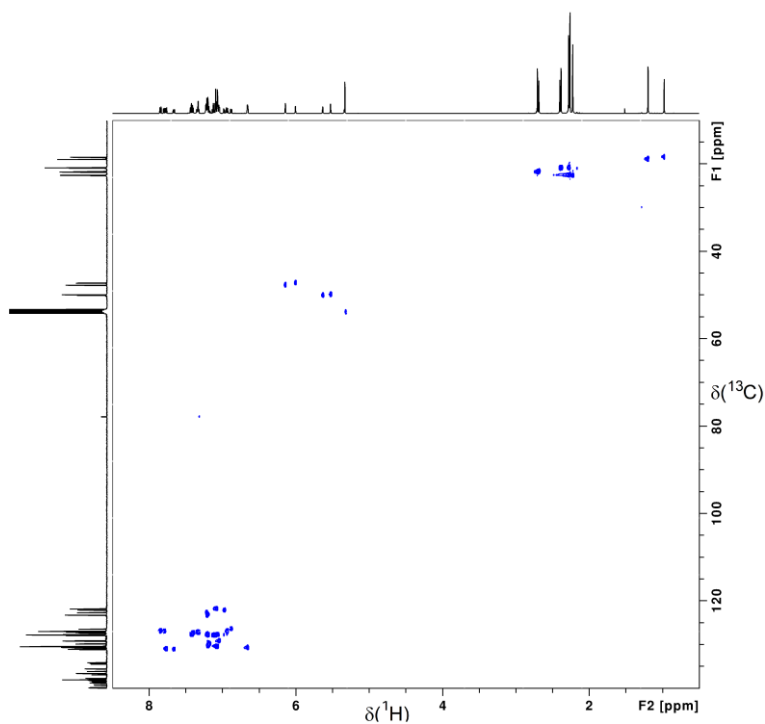

**Figure S49.** HSQC spectrum of **4** ( $\text{CD}_2\text{Cl}_2$ ). The spectra on the F1 and F2 axis are not the projections but the corresponding  $^{13}\text{C}$  and  $^1\text{H}$  NMR spectra showing also quaternary carbons' signals.

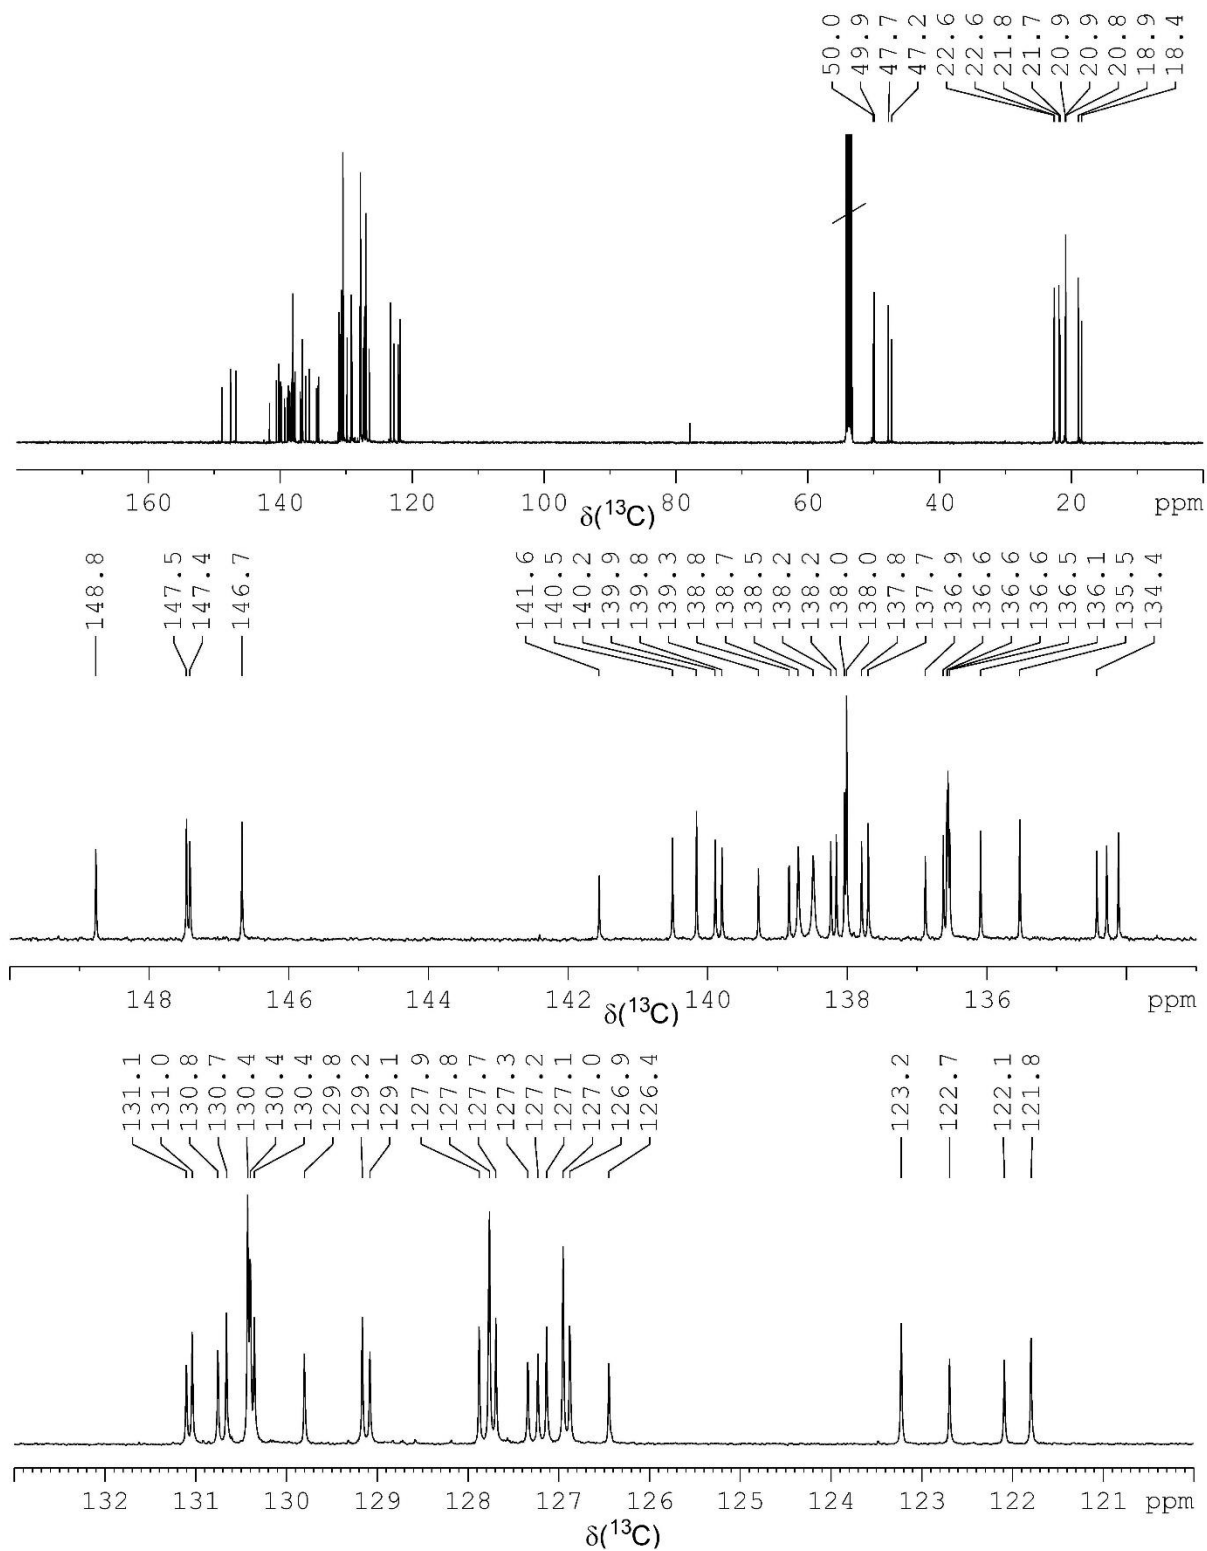

**Figure S50.**  $^{13}\text{C}$  NMR spectrum and selected regions of **4** ( $\text{CD}_2\text{Cl}_2$ ; 125 MHz; 30°C).

NMR data and spectra of **5**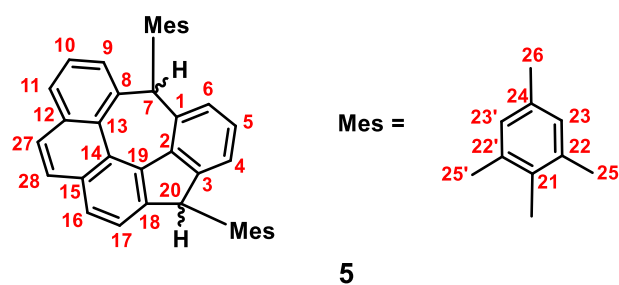Table S10. NMR data of **5**

| #                      | Major isomer (~ 75 mol%) |                 | Minor isomer (~ 25 mol%) |                 |
|------------------------|--------------------------|-----------------|--------------------------|-----------------|
|                        | <sup>1</sup> H           | <sup>13</sup> C | <sup>1</sup> H           | <sup>13</sup> C |
| 1                      | -                        | 137.2           | -                        | 137.3           |
| 2                      | -                        | 140.0 or 140.1  | -                        | 139.8 or 140.2  |
| 3                      | -                        | 147.2 *         | -                        | 147.2 *         |
| 4                      | 7.05 (d)                 | 121.5           | 7.05 (d)                 | 121.4           |
| 5                      | 7.13 (t)                 | 127.4 *         | 7.13 (t)                 | 127.4 *         |
| 6                      | 7.10                     | 128.0           | 7.10                     | 127.9           |
| 7                      | 7.09                     | 50.9            | 7.09                     | 50.8            |
| 8                      | -                        | 140.0 or 140.1  | -                        | 139.8 or 140.2  |
| 9                      | 7.60 (d)                 | 132.1           | 7.60 (d)                 | 132.2           |
| 10                     | 7.46                     | 126.8           | 7.44                     | 126.7           |
| 11                     | 7.78                     | 128.9           | 7.78                     | 128.9           |
| 12                     | -                        | 134.4 *         | -                        | 134.4 *         |
| 13                     | -                        | 130.5           | -                        | 130.8           |
| 14                     | -                        | 127.8 *         | -                        | 127.8 *         |
| 15                     | -                        | 133.5 *         | -                        | 133.5 *         |
| 16                     | 7.87 (d)                 | 129.5 *         | 7.86 (d)                 | 129.5 *         |
| 17                     | 7.46 (d)                 | 123.2           | 7.44 (d)                 | 123.1           |
| 18                     | -                        | 147.3 *         | -                        | 147.3 *         |
| 19                     | -                        | 138.3           | -                        | 138.1           |
| 20                     | 5.64                     | 49.9            | 5.62                     | 49.8            |
| 27                     | 7.78                     | 128.3           | 7.78                     | 128.4           |
| 28                     | 7.83 (d)                 | 128.0           | 7.82 (d)                 | 127.8           |
| <b>Mes at carbon 7</b> |                          |                 |                          |                 |
| 21                     | -                        | 144.6           | -                        | 145.1           |
| 22 = 22'               | -                        | 136.5 (br)      | -                        | 136.5 (br)      |
| 23 = 23'               | 6.90                     | 130.5           | 6.88                     | 130.4 (br)      |
| 24                     | -                        | 136.1           | -                        | 136.0           |
| 25 = 25'               | 2.33 (br)                | 21.5            | 2.33 (br)                | 21.3 (br)       |
| 26                     | 2.27                     | 20.7            | 2.27                     | 20.7            |

| <b>Mes at carbon 20</b> |      |         |      |         |
|-------------------------|------|---------|------|---------|
| 21                      | -    | 134.3 * | -    | 134.3 * |
| 22                      | -    | 138.4   | -    | 138.3   |
| 22'                     | -    | 137.9   | -    | 137.8   |
| 23                      | 7.09 | 129.2 * | 7.09 | 129.2 * |
| 23'                     | 6.67 | 130.8   | 6.68 | 130.7   |
| 24                      | -    | 136.7   | -    | 136.7   |
| 25                      | 2.75 | 21.9 *  | 2.75 | 21.9 *  |
| 25'                     | 1.11 | 18.6    | 1.10 | 18.7    |
| 26                      | 2.30 | 20.8    | 2.30 | 20.8    |

Note: The multiplicity is not reported when signals are overlapped. For signals marked \* two signals appear for major and minor isomer but separated less than 0.1 ppm.

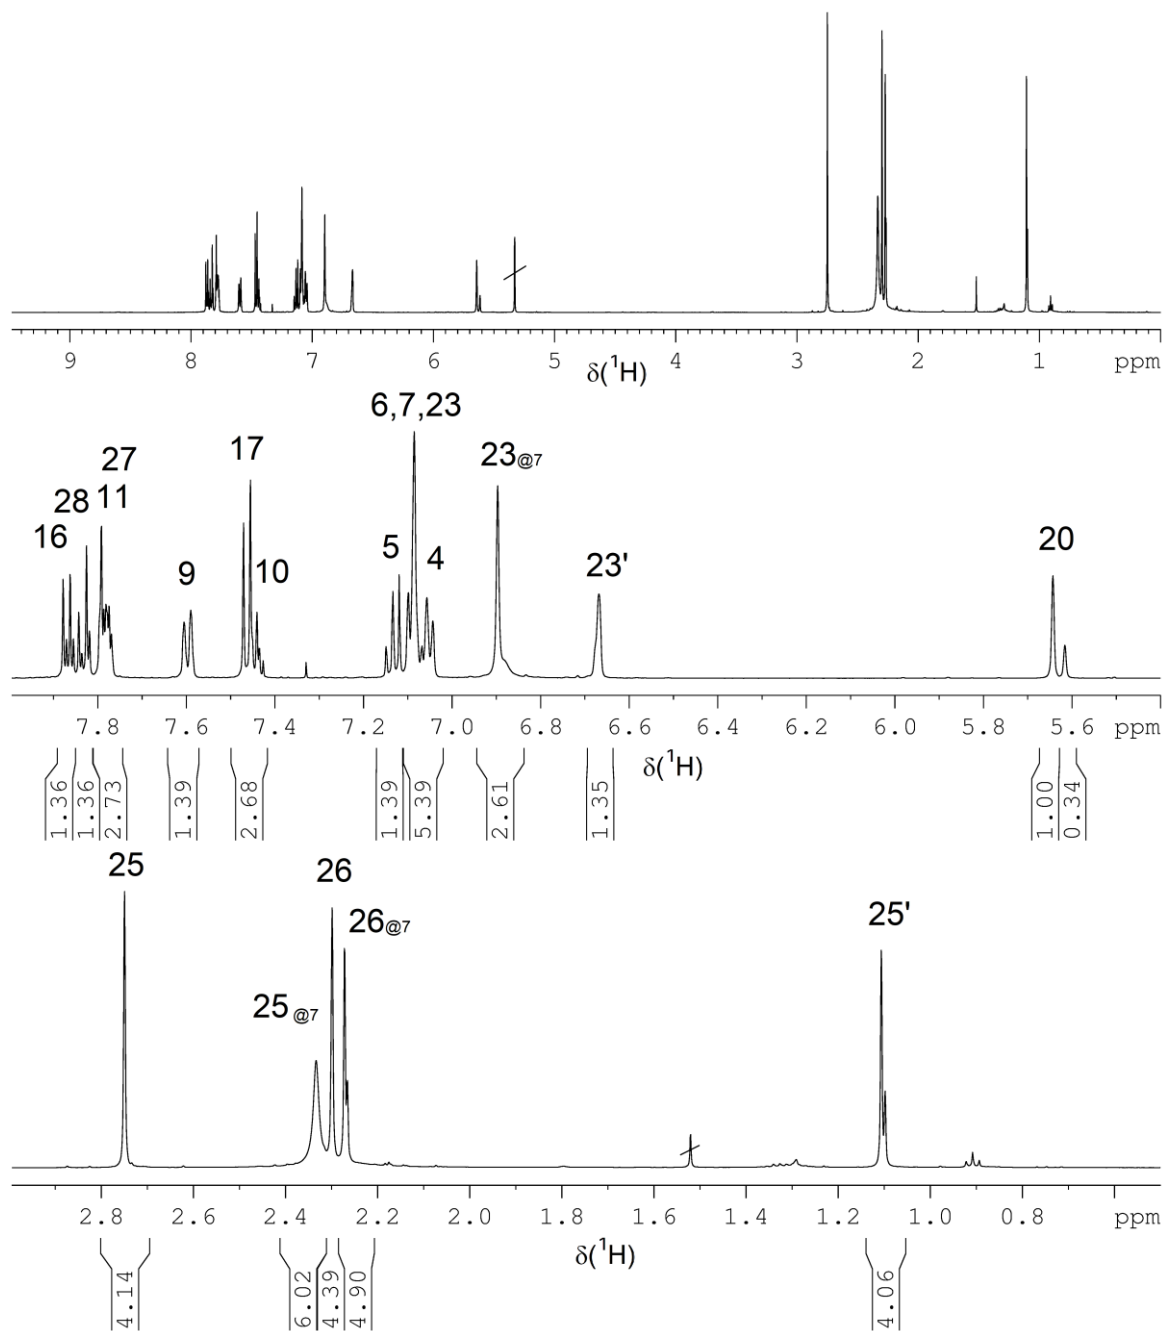

**Figure S51.**  $^1\text{H}$  NMR spectrum and selected regions of **5** ( $\text{CD}_2\text{Cl}_2$ ; 500 MHz, 30  $^\circ\text{C}$ ) with signal assignment for the major isomer. Note: The integral values can deviate from the expected ones due to signal overlap with signals of minor isomer.  $\text{H}_{23/23'}$ ,  $\text{H}_{25/25'}$  and  $\text{H}_{26}$  of the mesityl moiety bonded to  $\text{CH}_{20}$  are not marked with @20.

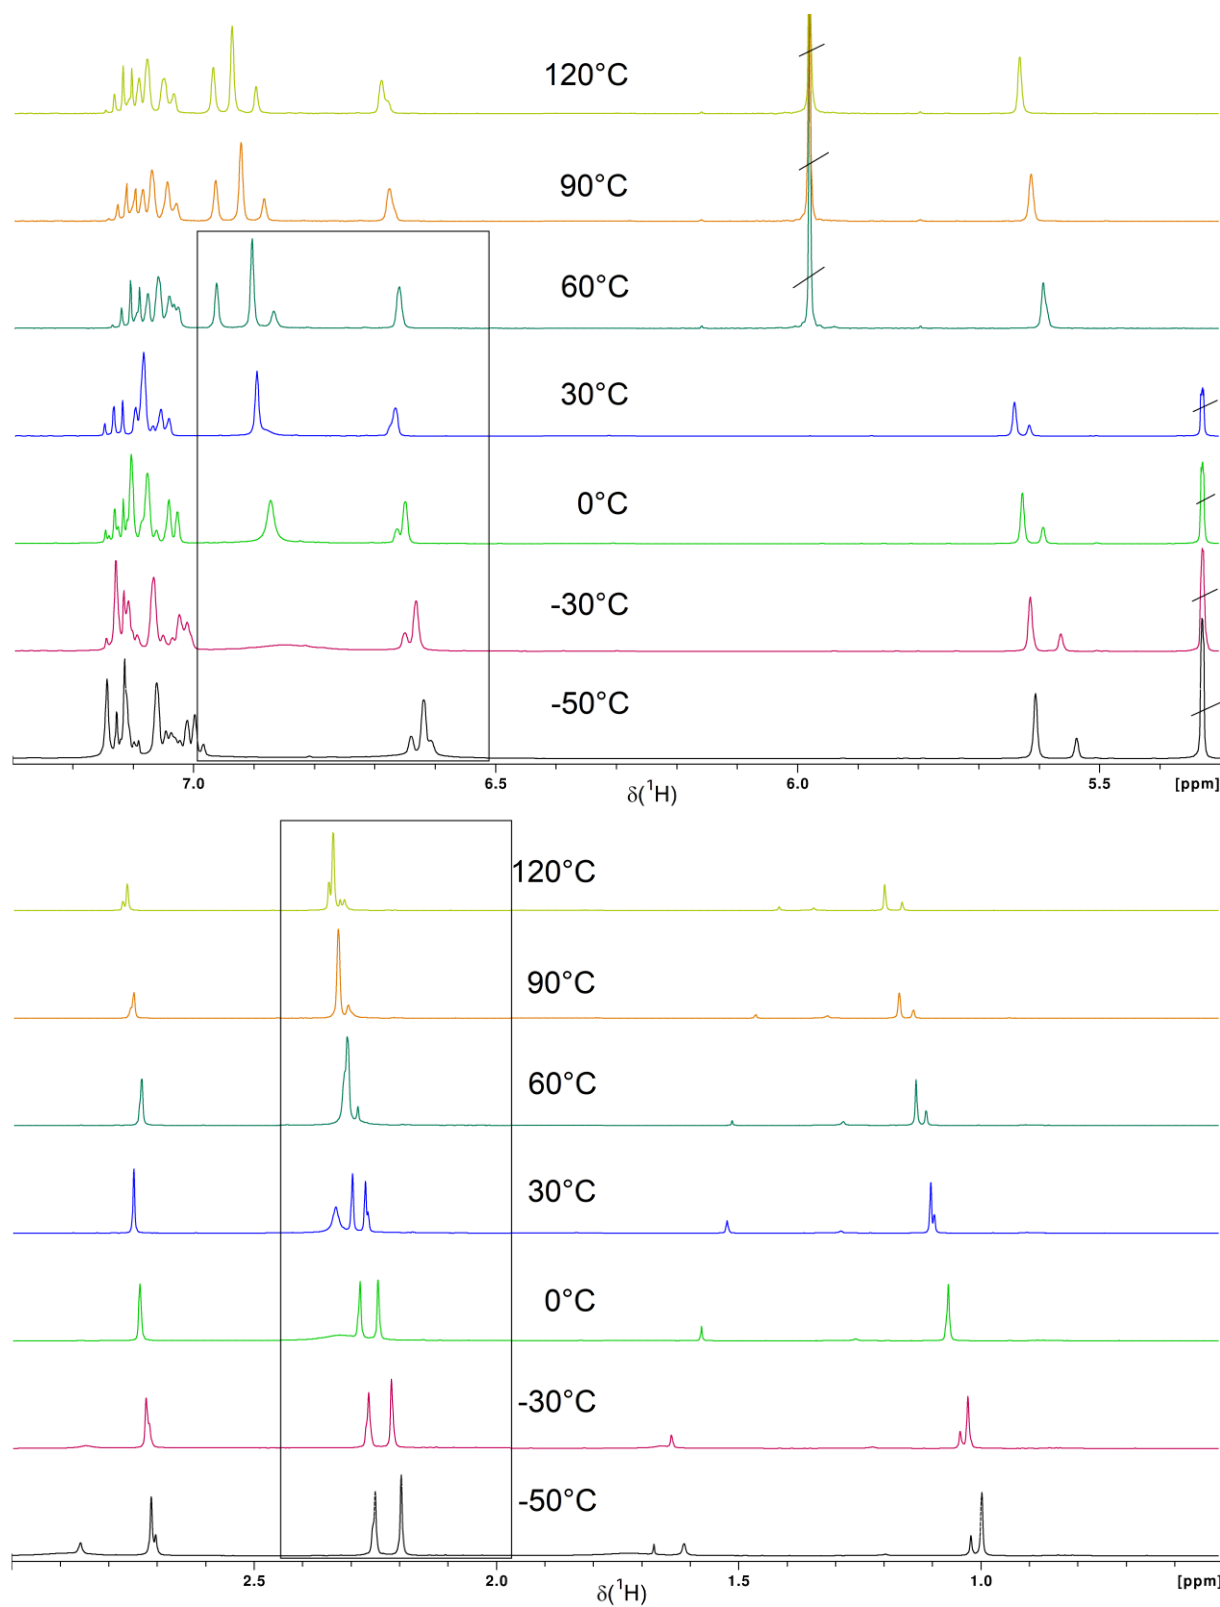

**Figure S52.**  $^1\text{H}$  NMR spectra (regions) of **5** at different temperatures ( $\text{CD}_2\text{Cl}_2$  @  $-50$  to  $30^\circ\text{C}$ ;  $\text{C}_2\text{D}_2\text{Cl}_2$  @  $60$ – $120^\circ\text{C}$ ; 500 MHz). The box marks signals with changing line width.

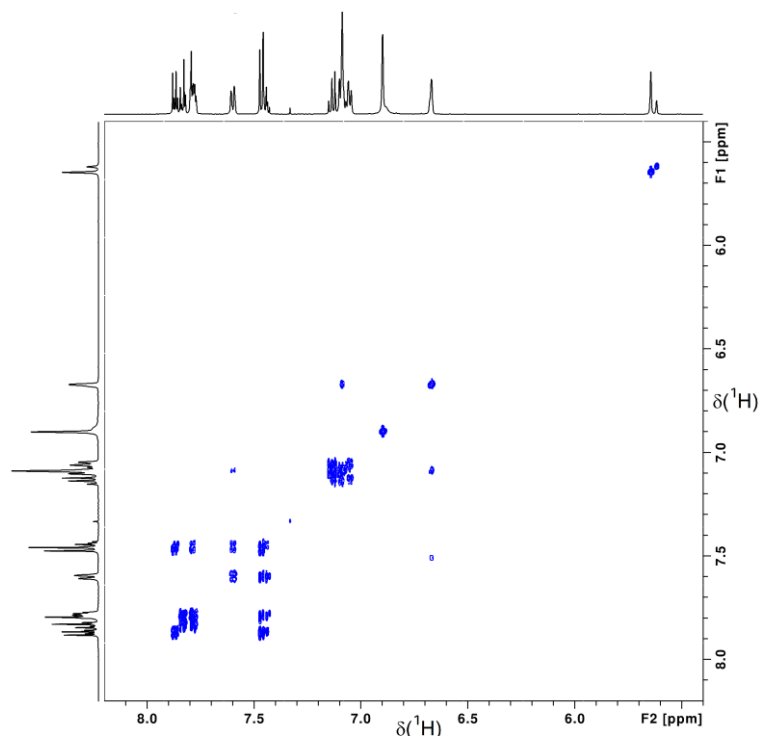

**Figure S53.** COSY spectrum (region) of **5** (solvent: CD<sub>2</sub>Cl<sub>2</sub>).

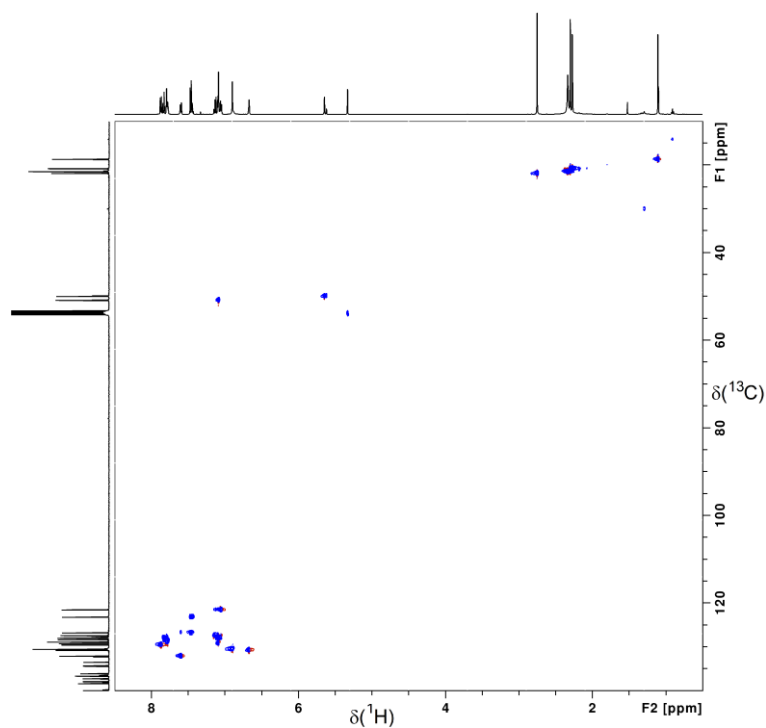

**Figure S54.** HSQC spectrum of **5** (solvent: CD<sub>2</sub>Cl<sub>2</sub>). The spectra on the F1 and F2 axis are not the projections but the corresponding <sup>13</sup>C and <sup>1</sup>H NMR spectra showing also quaternary carbons' signals.

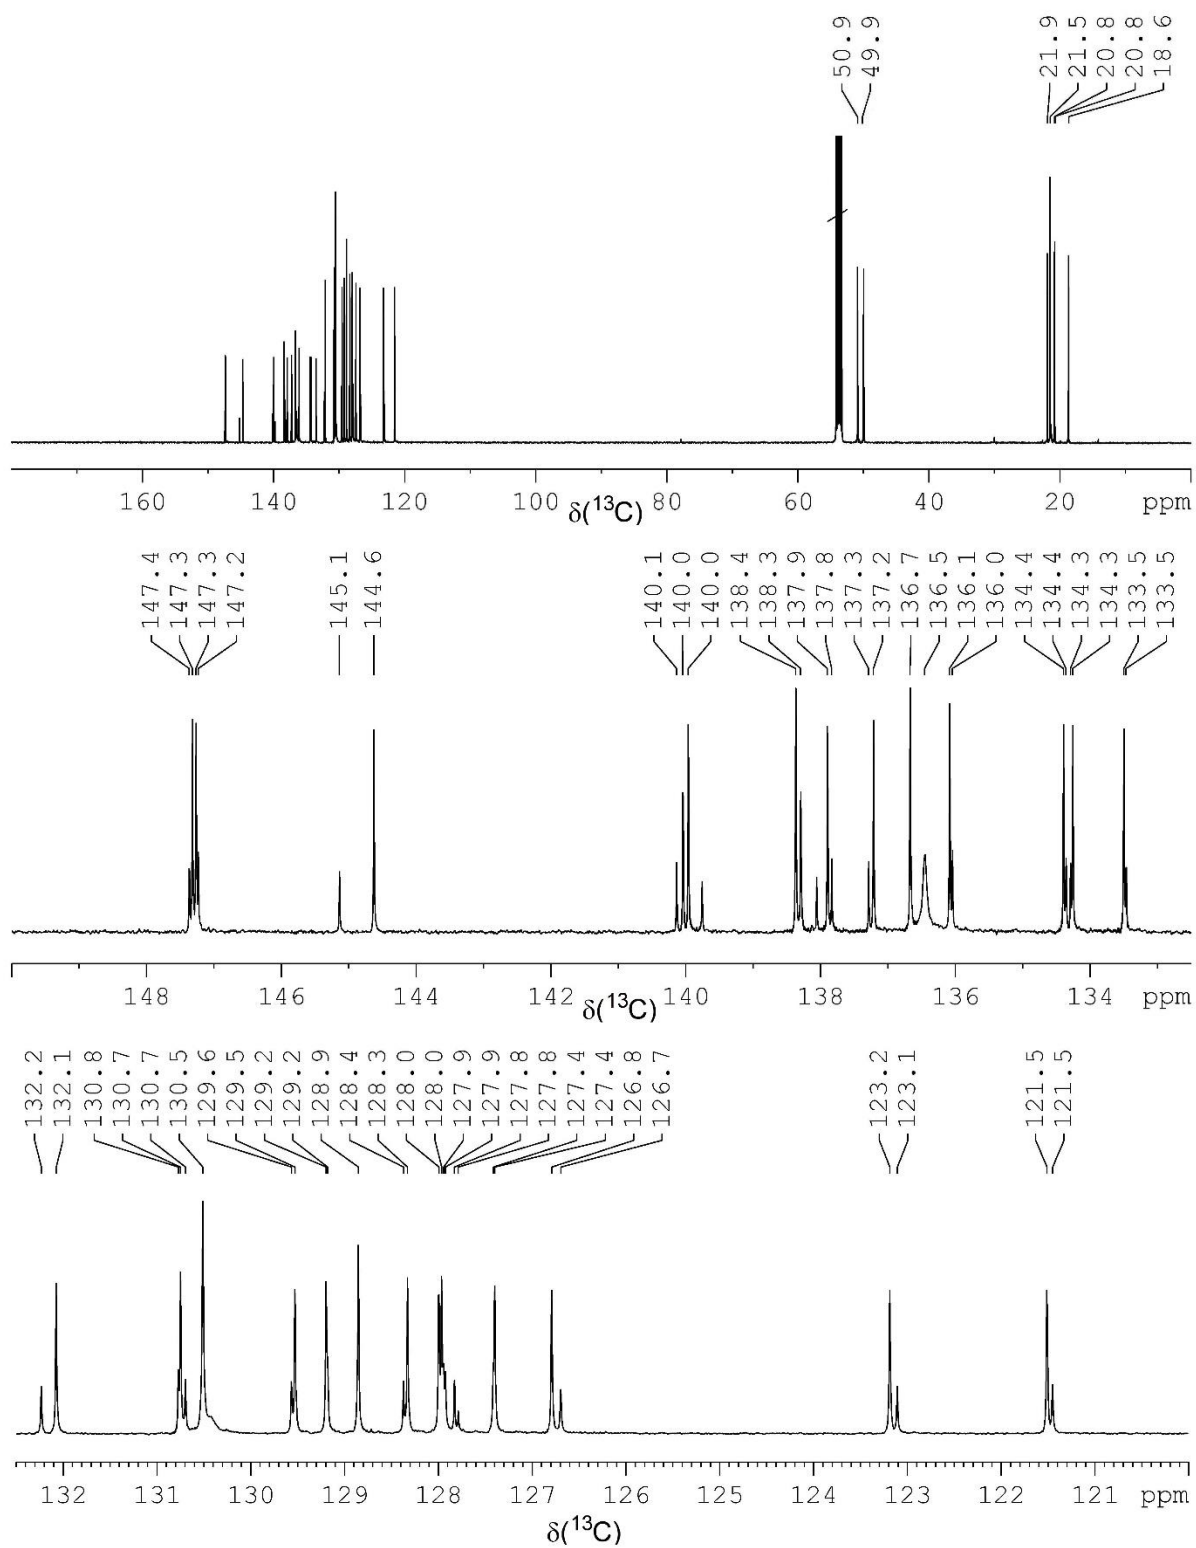

**Figure S55.**  $^{13}\text{C}$  NMR spectrum and selected regions of **5** ( $\text{CD}_2\text{Cl}_2$ ; 125 MHz; 30 °C).



NMR data and spectra of **6**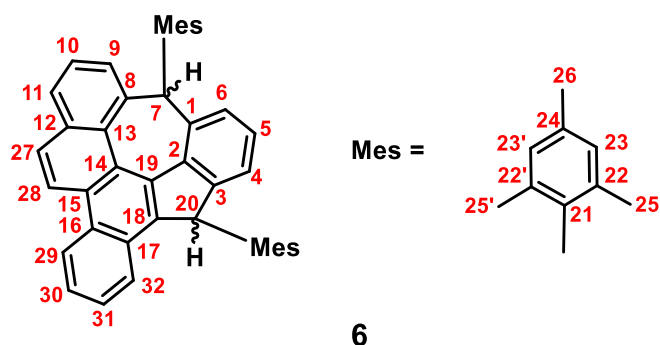

Mixture of four isomers in a molar ratio of ~ 55 : 32 : 9 : 4

**Table S11.** NMR data of **6**

| #  | Major isomer (~ 55 mol%) |                 | Selected <sup>1</sup> H NMR signals of minor isomers |
|----|--------------------------|-----------------|------------------------------------------------------|
|    | <sup>1</sup> H           | <sup>13</sup> C |                                                      |
| 1  | -                        | ~136.8          |                                                      |
| 2  | -                        | 141.0           |                                                      |
| 3  | -                        | 146.6           |                                                      |
| 4  | 7.06 (d)                 | 121.4           |                                                      |
| 5  | 7.14 (t)                 | 127.0           |                                                      |
| 6  | 7.14                     | 127.8           |                                                      |
| 7  | 7.03                     | 50.7            |                                                      |
| 8  | -                        | 139.8           |                                                      |
| 9  | 7.72                     | 132.0           |                                                      |
| 10 | 7.51                     | 126.5           |                                                      |
| 11 | 7.92                     | 129.0           |                                                      |
| 12 | -                        | 134.4           |                                                      |
| 13 | -                        | 131.4           |                                                      |
| 14 | -                        | 130.9 or 127.2  |                                                      |
| 15 | -                        | 130.7           |                                                      |
| 16 | -                        | 130.9 or 127.2  |                                                      |
| 17 | -                        | 129.6           |                                                      |
| 18 | -                        | 144.0           |                                                      |
| 19 | -                        | ~136.8          |                                                      |
| 20 | 5.89                     | 49.9            | 5.87 (32) - 5.66 (9) - 5.64 (4 mol%)                 |
| 27 | 8.09                     | 129.1           |                                                      |
| 28 | 8.92                     | 122.1           |                                                      |
| 29 | 8.89                     | 124.8           |                                                      |
| 30 | 7.65                     | 126.7           |                                                      |
| 31 | 7.46                     | 127.1           |                                                      |

|                         |      |              |                                      |
|-------------------------|------|--------------|--------------------------------------|
| 32                      | 7.75 | 124.4        |                                      |
| <b>Mes at carbon 7</b>  |      |              |                                      |
| 21                      | -    | 142.9        |                                      |
| 22 = 22'                | -    | ~ 136.8 (br) |                                      |
| 23 = 23'                | 6.91 | 130.6        |                                      |
| 24                      | -    | ~ 136.8 (br) |                                      |
| 25 = 25'                | 2.32 | 21.8         |                                      |
| 26                      | 2.28 | 20.8         |                                      |
| <b>Mes at carbon 20</b> |      |              |                                      |
| 21                      | -    | 136.1        |                                      |
| 22                      | -    | 137.1        |                                      |
| 22'                     | -    | 137.6        |                                      |
| 23                      | 7.17 | 129.8        |                                      |
| 23'                     | 6.59 | 131.0        | 6.57 (32) – 6.69 (9) – 6.65 (4 mol%) |
| 24                      | -    | ~136.8       |                                      |
| 25                      | 2.89 | 22.2         | 2.91 (32) – 2.73 (9) – 2.77 (4 mol%) |
| 25'                     | 1.06 | 18.4         | 0.98 (32) – 1.14 (9) – 1.02 (4 mol%) |
| 26                      | 2.29 | 20.9         |                                      |

n.a. – not assigned

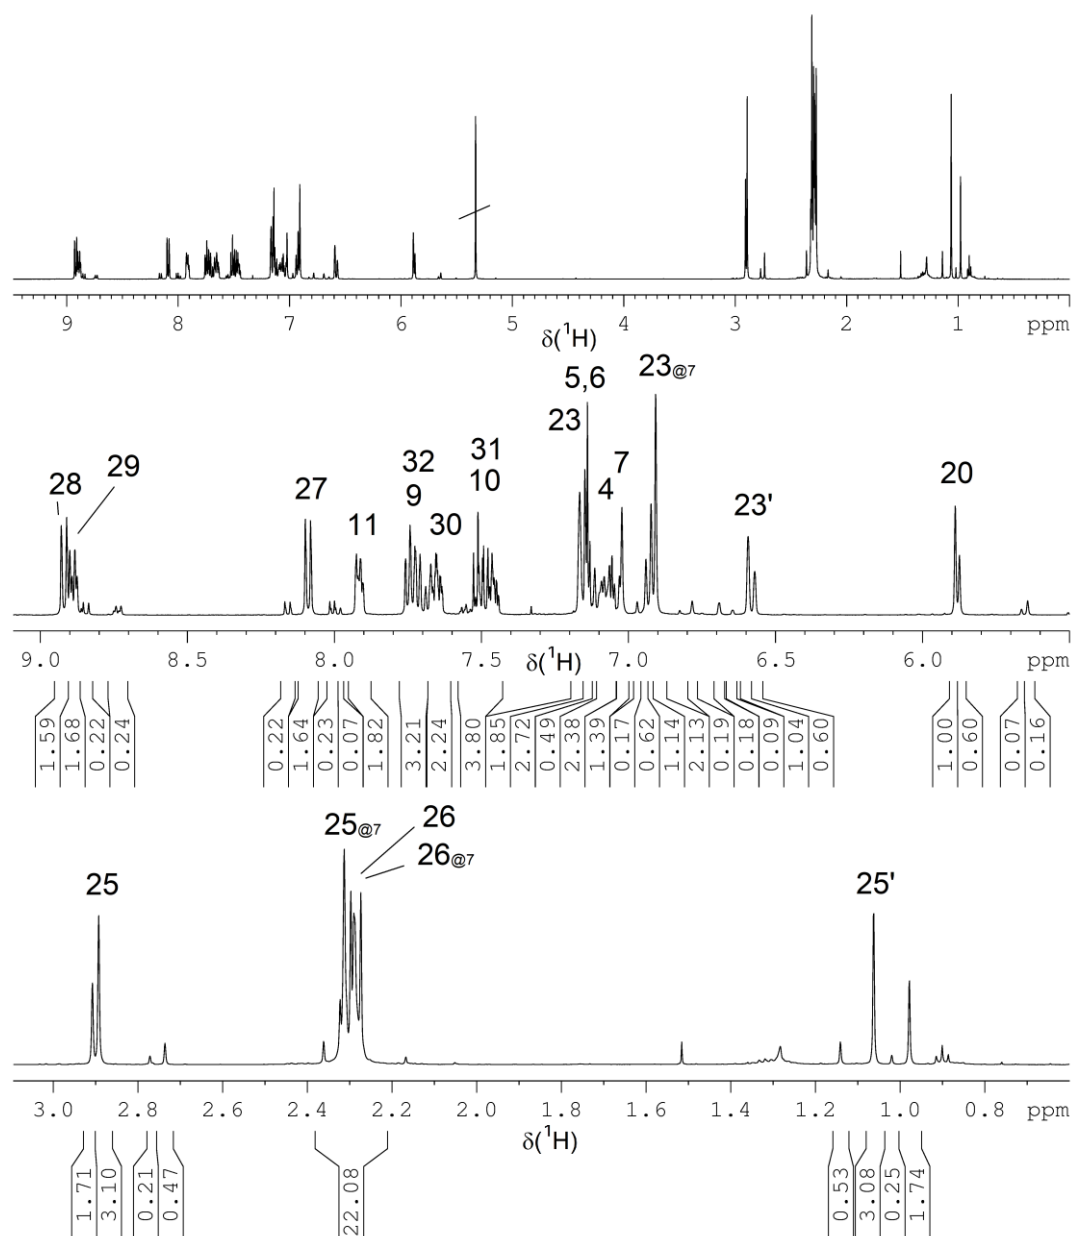

**Figure S56.**  $^1\text{H}$  NMR spectrum and selected regions of **6** ( $\text{CD}_2\text{Cl}_2$ ; 500 MHz, 30 °C) with signal assignment for the major isomer. Note: The integral values can deviate from the expected ones due to signal overlap with signals of minor isomer.  $\text{H}_{23/23'}$ ,  $\text{H}_{25/25'}$  and  $\text{H}_{26}$  of the mesityl moiety bonded to  $\text{CH}_{20}$  are not marked.

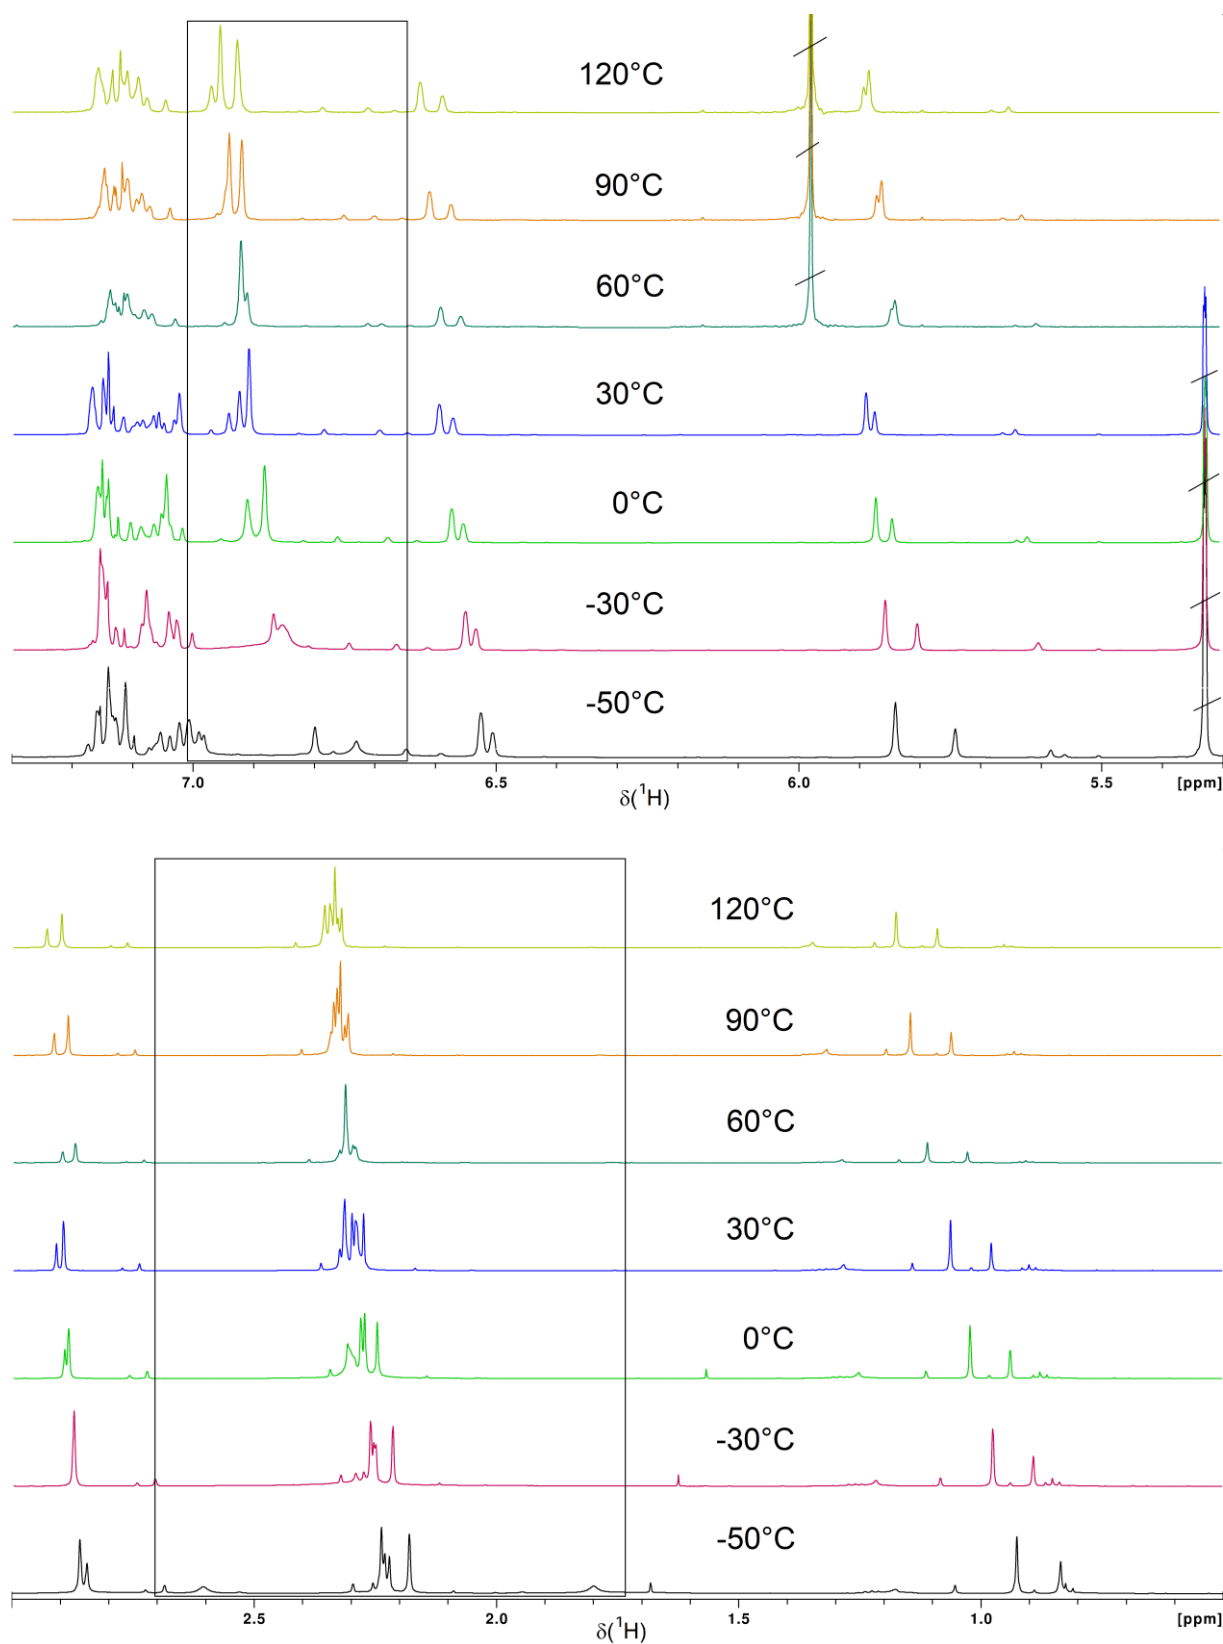

**Figure S57.**  $^1\text{H}$  NMR spectra (regions) of **6** at different temperatures ( $\text{CD}_2\text{Cl}_2$  @  $-50$  to  $30^\circ\text{C}$ ;  $\text{C}_2\text{D}_2\text{Cl}_2$  @  $60$  –  $120^\circ\text{C}$ ; 500 MHz). The box marks signals with changing line width.

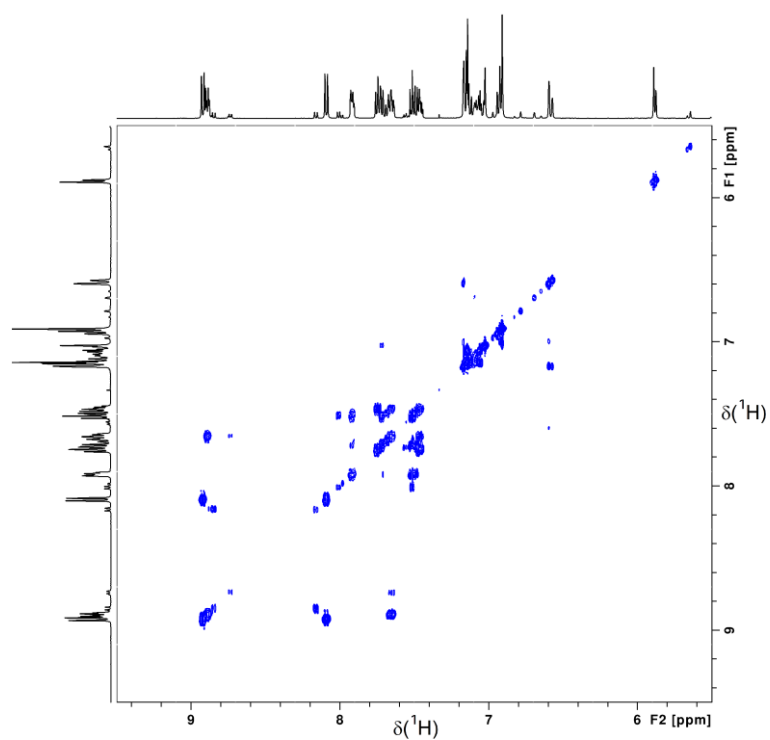

**Figure S58.** COSY spectrum (region) of **6** (solvent: CD<sub>2</sub>Cl<sub>2</sub>).

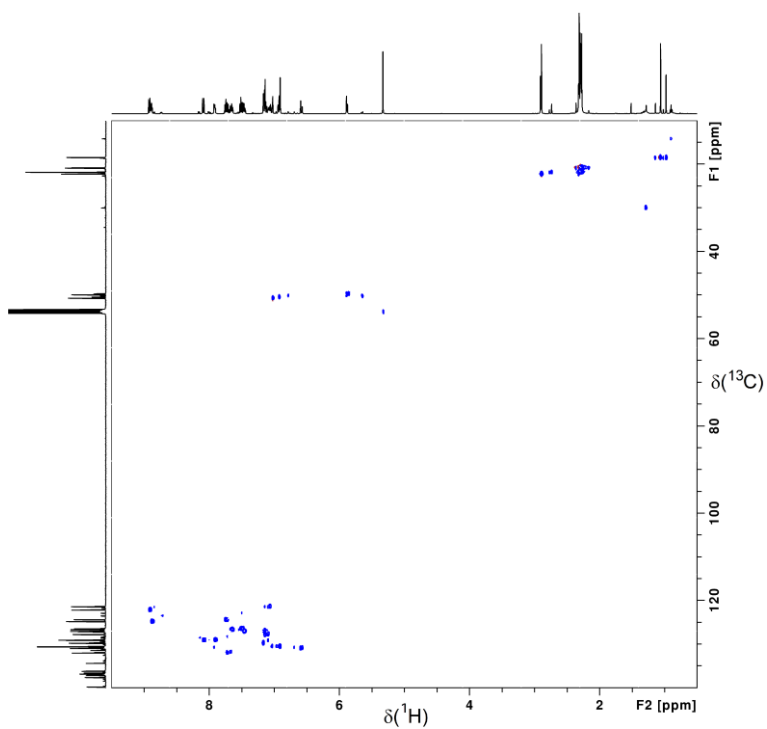

**Figure S59.** HSQC spectrum of **6** (solvent: CD<sub>2</sub>Cl<sub>2</sub>). The spectra on the F1 and F2 axis are not the projections but the corresponding <sup>13</sup>C and <sup>1</sup>H NMR spectra showing also quaternary carbons' signals.

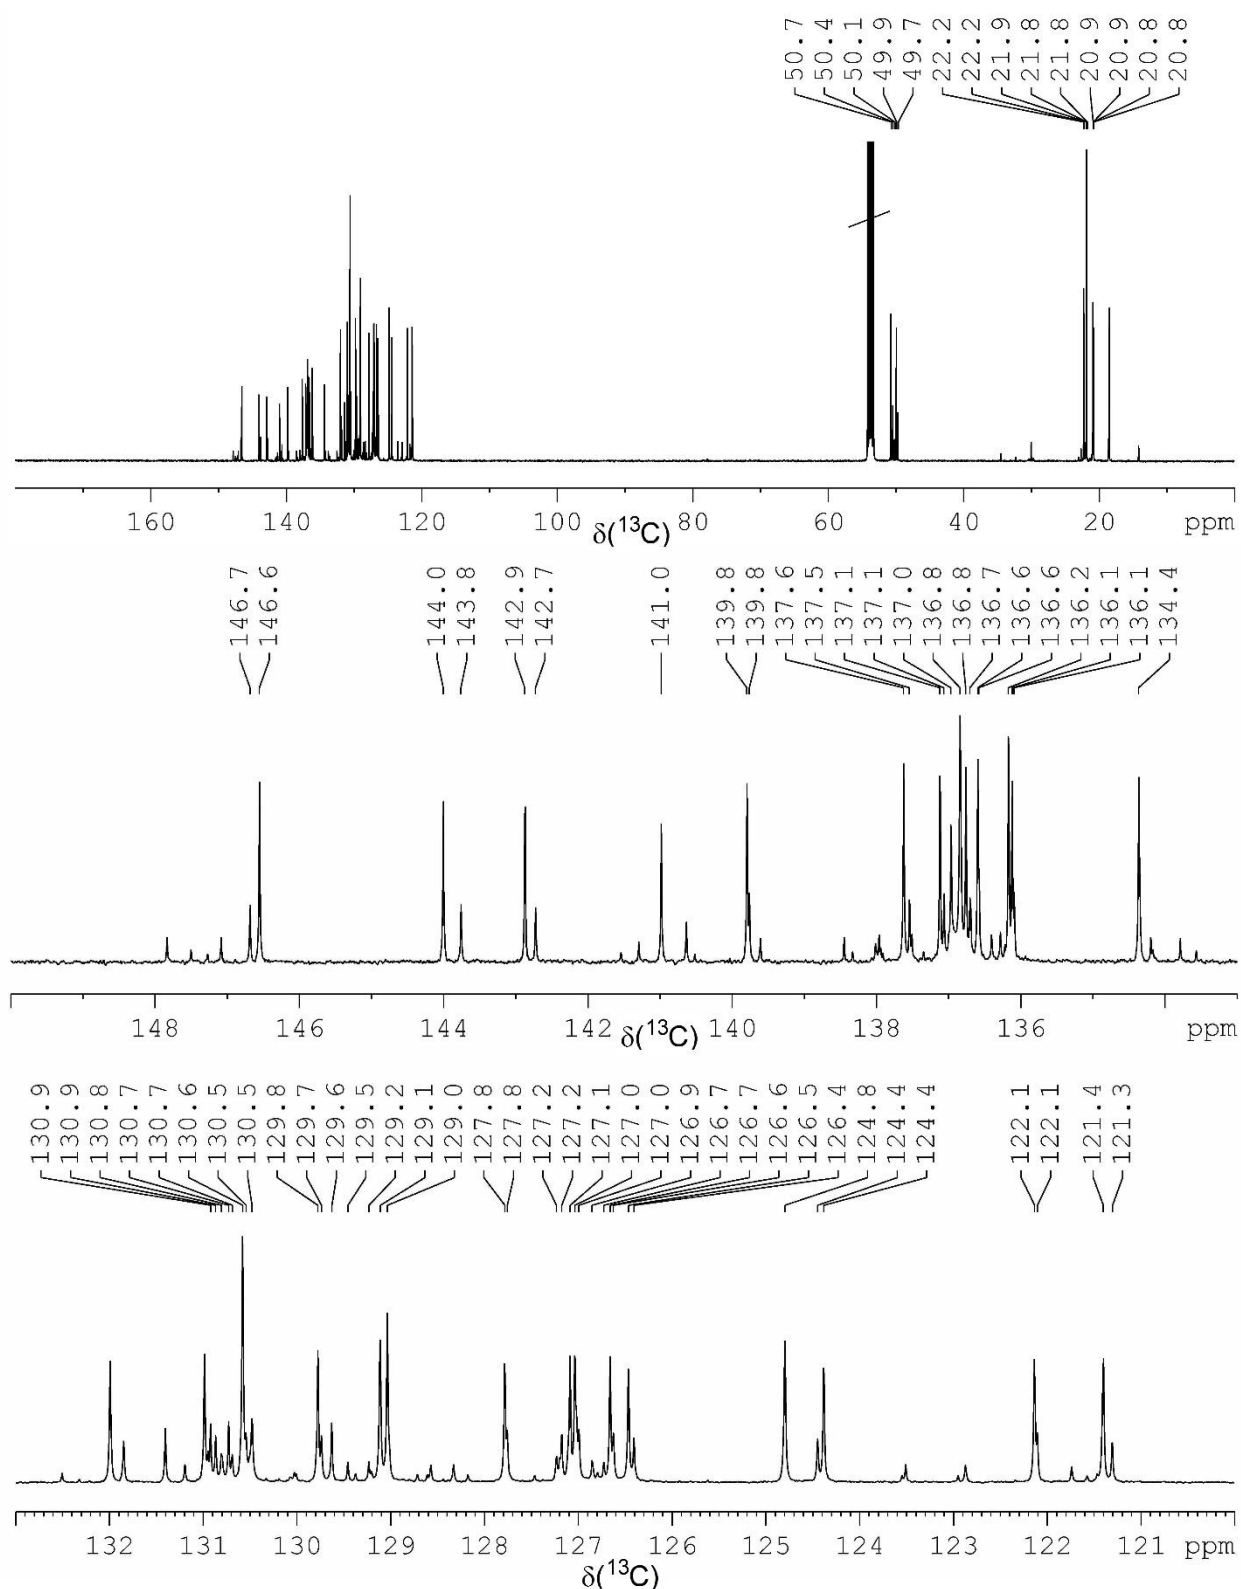

**Figure S60.**  $^{13}\text{C}$  NMR spectrum and selected regions of **6** ( $\text{CD}_2\text{Cl}_2$ ; 125 MHz; 30 °C).

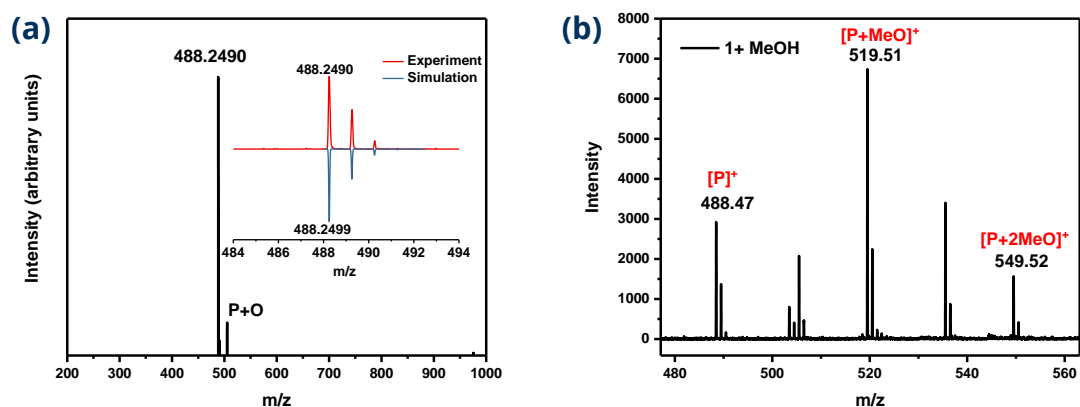

**Figure S61.** (a) HR-MALDI-TOF mass spectrum of **1**. Inset: experimental (red solid line) and simulated (blue solid line) isotopic distribution patterns of the mass peak. (Minor oxidation peaks were observed due to the oxidation under air during the MALDI operation). (b) MALDI-TOF mass spectrum of **1** in MeOH. (Matrix: DCTB)

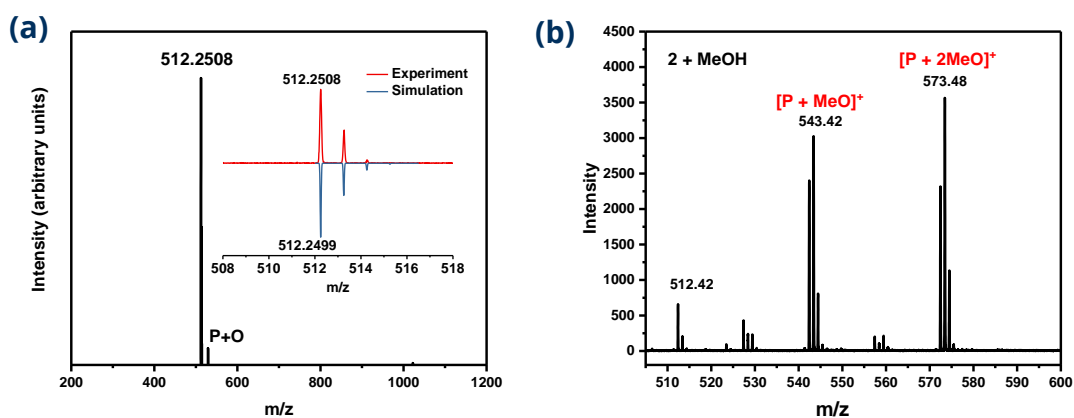

**Figure S62.** (a) HR-MALDI-TOF mass spectrum of **2**. Inset: experimental (red solid line) and simulated (blue solid line) isotopic distribution patterns of the mass peak. (Minor oxidation peaks were observed due to the oxidation under air during the MALDI operation). (b) MALDI-TOF mass spectrum of **2** in MeOH. (Matrix: DCTB)

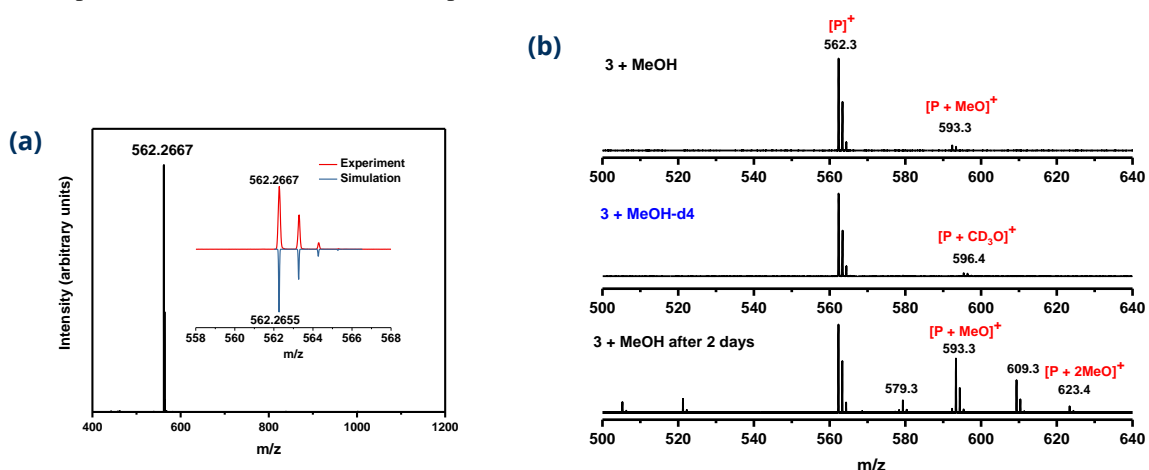

**Figure S63.** (a) HR-MALDI-TOF mass spectrum of **3**. Inset: experimental (red solid line) and simulated (blue solid line) isotopic distribution patterns of the mass peak. (b) MALDI-TOF mass spectrum of **3** in MeOH and MeOH-d<sub>4</sub>. (Matrix: DCTB)

In-situ synthesis of **1**, **2** and **3** followed by  $^1\text{H}$  NMR spectroscopy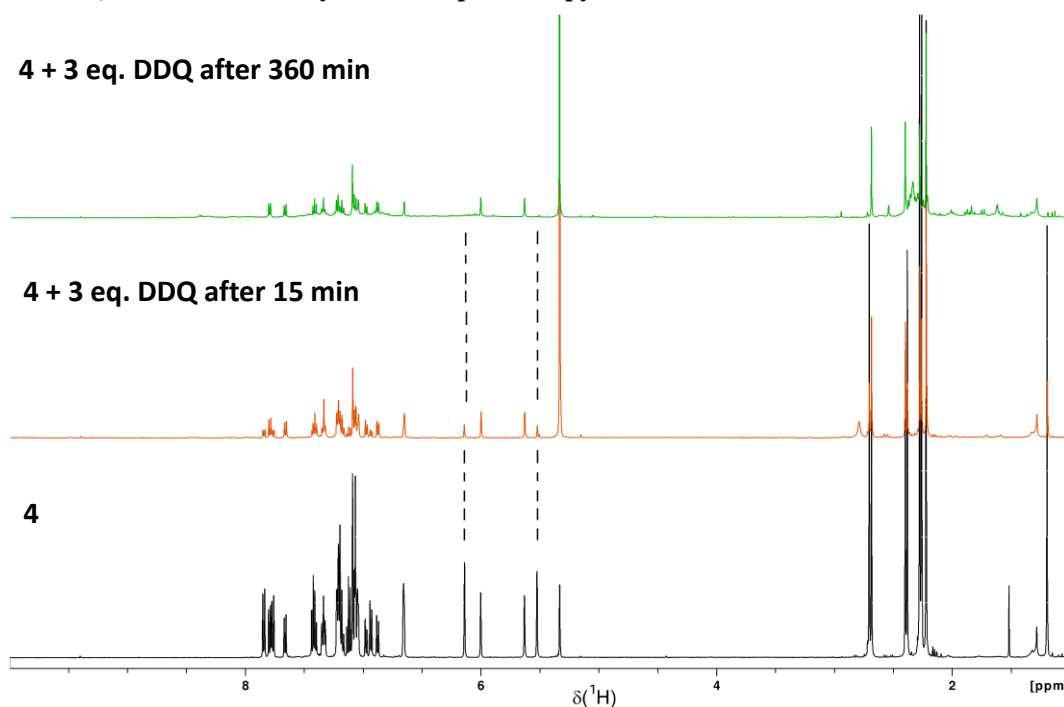

**Figure S64.**  $^1\text{H}$  NMR spectra (500 MHz) of precursor **4** and the reaction mixture after addition of 3 eq. DDQ at  $30^\circ\text{C}$  in  $\text{CD}_2\text{Cl}_2$  after 15 min and 6 hours. The reaction proceeds much slower than the reaction of **5** and **6** with 3 eq. DDQ. Moreover, the major isomer (two signals are marked with dashed lines) reacts faster with DDQ to **1** than the minor isomer. Signals of by-products were observed before the reaction was complete. Therefore, no experiments were carried out at low temperatures.

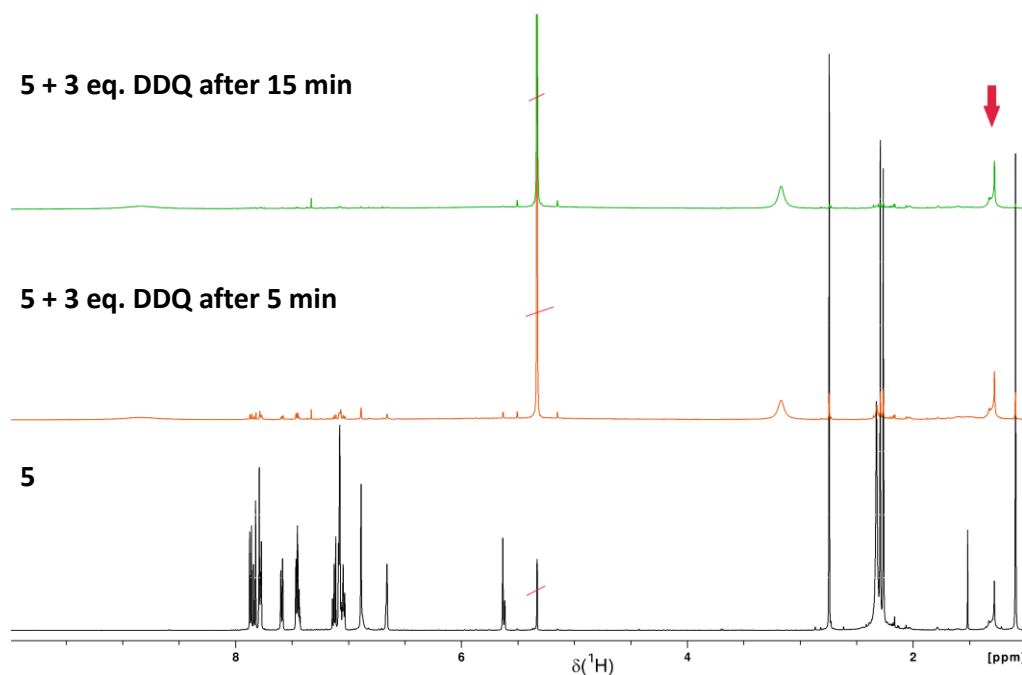

**Figure S65.**  $^1\text{H}$  NMR spectra (500 MHz) of precursor **5** and the reaction mixture after addition of 3 eq. DDQ at  $30^\circ\text{C}$  in  $\text{CD}_2\text{Cl}_2$  after 5 min and 15 min. The signals of **5** have completely disappeared after 15 min and the formed diradical **2** shows very broad lines. The red arrow marks an intensity reference.



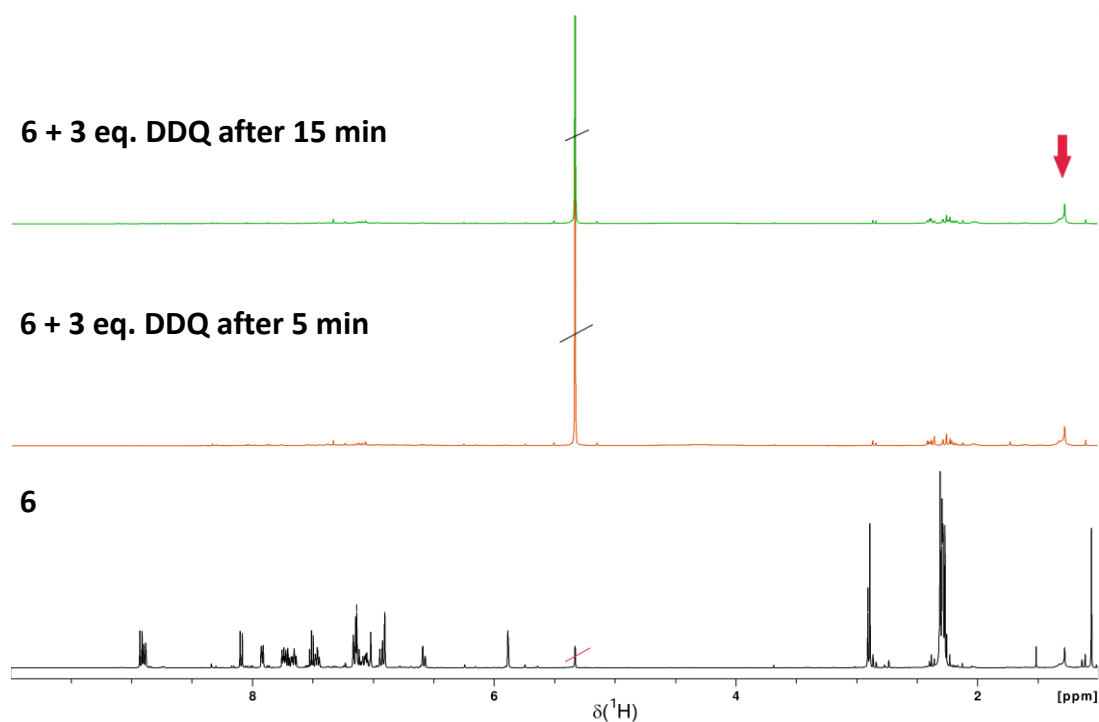

**Figure S66.**  $^1\text{H}$  NMR spectra (500 MHz) of precursor **6** and the reaction mixture after addition of 3 eq. DDQ at 30 °C in  $\text{CD}_2\text{Cl}_2$  after 5 min and 15 min. The signals of **6** have completely disappeared after 5 min and the formed diradical **3** shows very broad lines. The red arrow marks an intensity reference.

#### Low-temperature $^1\text{H}$ NMR measurements on **2** and **3**

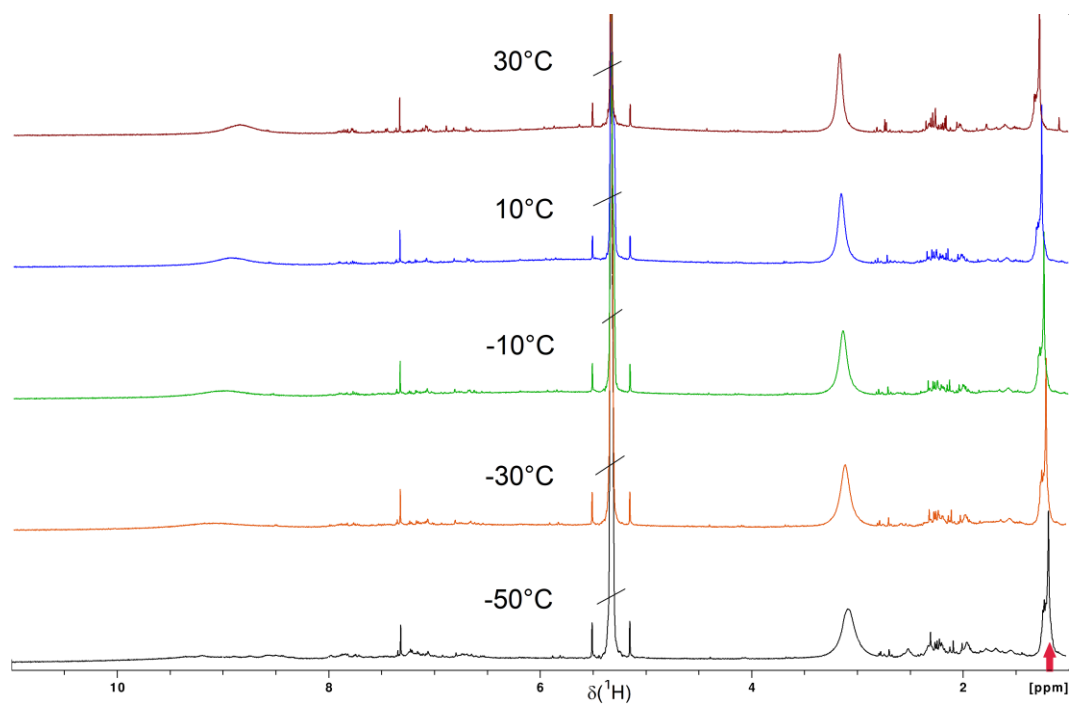

**Figure S67.** Low-temperature  $^1\text{H}$  NMR measurements on in situ formed **2** ( $\text{CD}_2\text{Cl}_2$ ; 500 MHz). The broad signals show some changes in position and line width but these effects cannot be explained. The red arrow marks an intensity reference.

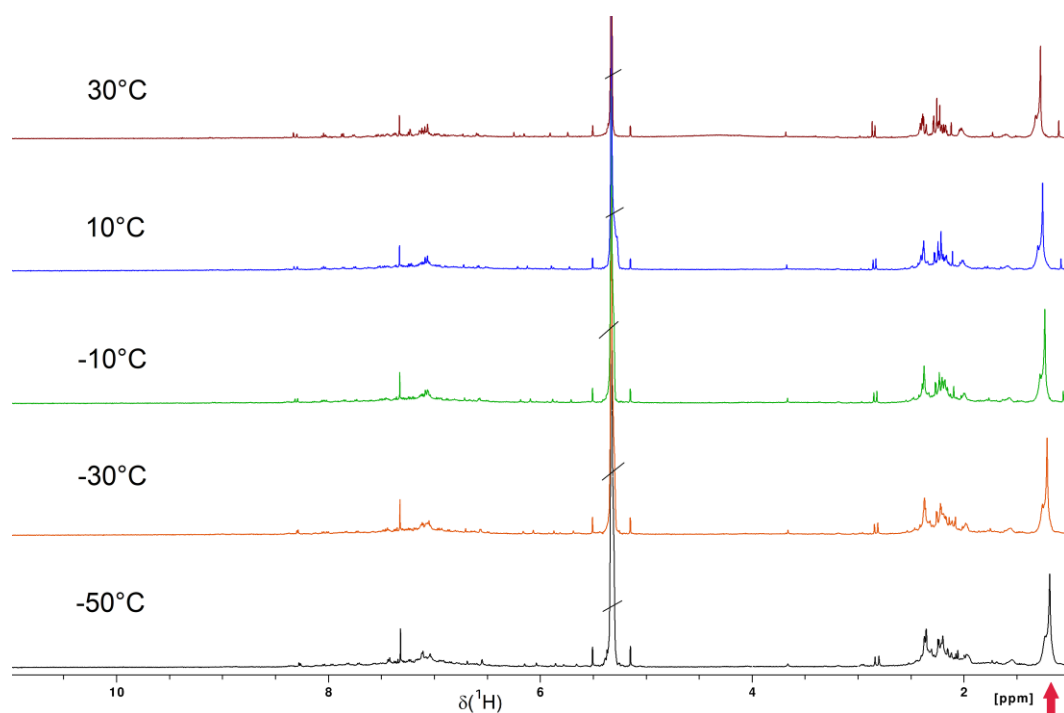

**Figure S68.** Low-temperature  $^1\text{H}$  NMR measurements on in situ formed **3** ( $\text{CD}_2\text{Cl}_2$ ; 500 MHz). The broad signals show some changes in position and line width but these effects cannot be explained. The red arrow marks an intensity reference.

**7. Appendix****Coordinates of optimized structures:**Singlet Closed Shell of 1 (RB3LYP/6-31G(d) (D3BJ))

|   |             |             |             |
|---|-------------|-------------|-------------|
| C | 2.81065200  | 2.55337800  | 0.40850300  |
| C | 2.04535500  | 3.66091000  | 0.67794100  |
| C | 0.62589100  | 3.64893200  | 0.55406800  |
| C | -0.07318300 | 2.51927800  | 0.15165400  |
| C | 0.68338000  | 1.31729000  | 0.00026700  |
| C | 2.15339400  | 1.33551400  | 0.09173900  |
| C | -1.50419000 | 2.58850400  | -0.21458800 |
| C | -2.46822900 | 1.51449100  | -0.19784200 |
| C | -2.23660600 | 0.07210200  | -0.08018400 |
| C | -1.01678200 | -0.61018500 | -0.17099200 |
| C | 0.27643500  | 0.00201800  | -0.20119000 |
| C | -1.96373800 | 3.86751200  | -0.59830100 |
| C | -3.29524900 | 4.16829600  | -0.83134100 |
| C | -4.25158500 | 3.16291700  | -0.68691900 |
| C | -3.83367700 | 1.88045100  | -0.38983100 |
| C | -1.02854600 | -2.05944700 | -0.22837800 |
| C | 0.12250400  | -2.79619400 | -0.33243700 |
| C | 1.40461100  | -2.17603800 | -0.33778400 |
| C | 1.49346100  | -0.80781900 | -0.26399700 |
| C | 2.64520400  | 0.04505100  | -0.10384200 |
| C | -5.74598800 | -2.38540300 | 0.47107800  |
| C | -5.25881600 | -2.12008300 | -0.81163400 |
| C | -4.12669200 | -1.32852700 | -1.02107800 |
| C | -3.46256900 | -0.78197900 | 0.09386600  |
| C | -3.93665400 | -1.03077600 | 1.39489000  |
| C | -5.07198300 | -1.82831900 | 1.56043900  |
| C | -6.95151900 | -3.27007400 | 0.67478500  |
| C | -3.23047500 | -0.44505700 | 2.59335900  |
| C | -3.62685400 | -1.06574400 | -2.42080900 |
| C | 4.05037300  | -0.40523000 | -0.05332900 |
| C | 4.75804800  | -0.40136700 | 1.16869300  |
| C | 6.08633100  | -0.83447700 | 1.19175200  |
| C | 6.73771000  | -1.27830500 | 0.03875900  |
| C | 6.02031300  | -1.28701300 | -1.15990700 |
| C | 4.69293900  | -0.85721800 | -1.22650800 |
| C | 3.96644200  | -0.85710200 | -2.55075400 |
| C | 4.08583700  | 0.03177400  | 2.44948100  |
| C | 8.18310800  | -1.71131300 | 0.08141800  |
| H | 3.89483600  | 2.58615400  | 0.46105300  |
| H | 2.52514300  | 4.59072400  | 0.97204400  |
| H | 0.09327600  | 4.56642700  | 0.77531800  |
| H | -1.22804200 | 4.65047100  | -0.72789400 |
| H | -3.58107100 | 5.17472300  | -1.12324300 |
| H | -5.30732800 | 3.36675800  | -0.83775700 |
| H | -4.58274900 | 1.10428100  | -0.32771500 |

---

|   |             |             |             |
|---|-------------|-------------|-------------|
| H | -1.98062500 | -2.57155500 | -0.20164000 |
| H | 0.05884700  | -3.87902600 | -0.38836000 |
| H | 2.30570100  | -2.78374500 | -0.36688200 |
| H | -5.77364300 | -2.53826000 | -1.67396800 |
| H | -5.43785000 | -2.01809400 | 2.56724500  |
| H | -6.65648000 | -4.32166100 | 0.78778600  |
| H | -7.50560700 | -2.98973000 | 1.57661800  |
| H | -7.63692500 | -3.21479000 | -0.17731400 |
| H | -2.19124200 | -0.78875000 | 2.64966400  |
| H | -3.19835900 | 0.64951400  | 2.54224500  |
| H | -3.73419700 | -0.72760600 | 3.52216700  |
| H | -4.31343800 | -1.47941300 | -3.16498800 |
| H | -3.52119900 | 0.00795900  | -2.61253500 |
| H | -2.64021100 | -1.51516100 | -2.58246000 |
| H | 6.62292900  | -0.83555700 | 2.13867700  |
| H | 6.50983700  | -1.62846600 | -2.07008300 |
| H | 3.19048200  | -1.63059500 | -2.59240900 |
| H | 3.46004500  | 0.09917400  | -2.72032500 |
| H | 4.66105000  | -1.03560600 | -3.37753500 |
| H | 3.88829100  | 1.10981500  | 2.46368800  |
| H | 3.11528200  | -0.46155400 | 2.57061600  |
| H | 4.70863200  | -0.20870200 | 3.31680300  |
| H | 8.45111300  | -2.11450200 | 1.06386000  |
| H | 8.85781400  | -0.86804900 | -0.11871900 |
| H | 8.39376800  | -2.47966700 | -0.67024600 |

Singlet Biradical Open Shell of **1** (UB3LYP/6-31G(d) (D3BJ) nosymm guess=(mix,always))

|   |             |             |             |
|---|-------------|-------------|-------------|
| C | 2.80407700  | 2.52882900  | 0.45295100  |
| C | 2.04574400  | 3.66768000  | 0.67789200  |
| C | 0.64977100  | 3.65523200  | 0.51561200  |
| C | -0.05857500 | 2.50737600  | 0.10682400  |
| C | 0.69065900  | 1.32622700  | -0.00088400 |
| C | 2.12842400  | 1.33755200  | 0.13847700  |
| C | -1.49833000 | 2.59898000  | -0.24982200 |
| C | -2.46719300 | 1.52947400  | -0.20764500 |
| C | -2.24069000 | 0.09381600  | -0.10282900 |
| C | -1.00106000 | -0.61644800 | -0.23530200 |
| C | 0.27944200  | -0.02992500 | -0.23295600 |
| C | -1.94515300 | 3.87709100  | -0.63260700 |
| C | -3.28084100 | 4.19619300  | -0.84170900 |
| C | -4.24086500 | 3.20381600  | -0.65373100 |
| C | -3.83330800 | 1.91648000  | -0.35357900 |
| C | -1.02162300 | -2.05124500 | -0.35428700 |
| C | 0.12929400  | -2.80770000 | -0.45903400 |
| C | 1.40345700  | -2.20731400 | -0.41334900 |
| C | 1.47263300  | -0.82991100 | -0.28820800 |
| C | 2.62364600  | 0.02155100  | -0.07385900 |
| C | -5.71172400 | -2.40918100 | 0.48962100  |

---

|   |             |             |             |
|---|-------------|-------------|-------------|
| C | -5.27456000 | -2.09331400 | -0.79978200 |
| C | -4.15819900 | -1.28266700 | -1.02042100 |
| C | -3.45571200 | -0.76788800 | 0.08678200  |
| C | -3.88065100 | -1.07137500 | 1.39327700  |
| C | -5.00272900 | -1.88475800 | 1.57291800  |
| C | -6.90090000 | -3.31331200 | 0.70515400  |
| C | -3.13493400 | -0.51966200 | 2.58390600  |
| C | -3.71359200 | -0.95873100 | -2.42580300 |
| C | 4.02837000  | -0.41832900 | -0.02382000 |
| C | 4.71959400  | -0.44754500 | 1.20665500  |
| C | 6.04956500  | -0.87377100 | 1.22837200  |
| C | 6.71661800  | -1.27017100 | 0.06682000  |
| C | 6.01311300  | -1.24166000 | -1.14008000 |
| C | 4.68251300  | -0.82407600 | -1.20716600 |
| C | 3.96714000  | -0.78219500 | -2.53673700 |
| C | 4.02734300  | -0.06507000 | 2.49335200  |
| C | 8.16444200  | -1.69371100 | 0.11000000  |
| H | 3.88658600  | 2.53966200  | 0.53847500  |
| H | 2.52989300  | 4.59358900  | 0.97505200  |
| H | 0.10666400  | 4.56961200  | 0.72279700  |
| H | -1.20517900 | 4.65408200  | -0.77922000 |
| H | -3.56132500 | 5.20317400  | -1.13576900 |
| H | -5.29907100 | 3.41961500  | -0.76973700 |
| H | -4.59131200 | 1.15195000  | -0.25568700 |
| H | -1.97841800 | -2.55639500 | -0.36123600 |
| H | 0.04704900  | -3.88657800 | -0.55463800 |
| H | 2.30874700  | -2.80695900 | -0.44470900 |
| H | -5.81701000 | -2.48624000 | -1.65727600 |
| H | -5.32996000 | -2.11389700 | 2.58501500  |
| H | -6.59357300 | -4.36577700 | 0.76654900  |
| H | -7.42248900 | -3.07285000 | 1.63748200  |
| H | -7.61929400 | -3.23253500 | -0.11736100 |
| H | -2.08847400 | -0.84604500 | 2.58281800  |
| H | -3.12333800 | 0.57643700  | 2.57270900  |
| H | -3.59388700 | -0.84679400 | 3.52158600  |
| H | -4.38436700 | -1.40942400 | -3.16318500 |
| H | -3.69462500 | 0.12369100  | -2.59669400 |
| H | -2.69928700 | -1.32754300 | -2.61776300 |
| H | 6.57515200  | -0.90628800 | 2.18057300  |
| H | 6.51533700  | -1.54645600 | -2.05598900 |
| H | 3.16276000  | -1.52452800 | -2.59007500 |
| H | 3.50090000  | 0.19519500  | -2.70391700 |
| H | 4.66137000  | -0.97759000 | -3.35949900 |
| H | 3.80861500  | 1.00777000  | 2.53623600  |
| H | 3.06721200  | -0.58299300 | 2.59490700  |
| H | 4.64776100  | -0.31769400 | 3.35845200  |
| H | 8.42547700  | -2.12772900 | 1.08087100  |
| H | 8.83316300  | -0.83828000 | -0.05456000 |
| H | 8.38847700  | -2.43398000 | -0.66533000 |

Triplet State of 1 (UB3LYP/6-31G(d) (D3BJ)

|   |             |             |             |
|---|-------------|-------------|-------------|
| C | 2.80229700  | 2.51025700  | 0.46612800  |
| C | 2.05197600  | 3.67005900  | 0.67723100  |
| C | 0.66888900  | 3.66642100  | 0.51449500  |
| C | -0.05611900 | 2.50792000  | 0.11732100  |
| C | 0.68780500  | 1.33256700  | 0.02062100  |
| C | 2.11427000  | 1.33649900  | 0.16278000  |
| C | -1.49938200 | 2.61220600  | -0.20070400 |
| C | -2.46383100 | 1.53659400  | -0.16260300 |
| C | -2.23587600 | 0.10295100  | -0.09013600 |
| C | -1.00141700 | -0.62144600 | -0.24752700 |
| C | 0.28154700  | -0.03971000 | -0.22652500 |
| C | -1.95873600 | 3.90011500  | -0.54094400 |
| C | -3.29740100 | 4.21985000  | -0.71550800 |
| C | -4.25049400 | 3.21823900  | -0.52963100 |
| C | -3.83501200 | 1.92684600  | -0.26696900 |
| C | -1.02397700 | -2.04764100 | -0.40171300 |
| C | 0.13348500  | -2.81276300 | -0.51778500 |
| C | 1.39968400  | -2.22872400 | -0.45468200 |
| C | 1.46934600  | -0.83738300 | -0.29117200 |
| C | 2.60657200  | 0.00085200  | -0.06324400 |
| C | -5.69468400 | -2.42596400 | 0.46501200  |
| C | -5.27319100 | -2.06837600 | -0.81876000 |
| C | -4.16190000 | -1.24741800 | -1.02596500 |
| C | -3.44917100 | -0.76407300 | 0.08856200  |
| C | -3.85722000 | -1.11129400 | 1.38926000  |
| C | -4.97479200 | -1.93364000 | 1.55615900  |
| C | -6.87844000 | -3.34070000 | 0.66550100  |
| C | -3.09775700 | -0.59650100 | 2.58764400  |
| C | -3.73307400 | -0.87668900 | -2.42452600 |
| C | 4.01564000  | -0.42691900 | -0.03050400 |
| C | 4.71216200  | -0.47434000 | 1.19588000  |
| C | 6.04665800  | -0.88619200 | 1.20184000  |
| C | 6.71210500  | -1.24844100 | 0.02815900  |
| C | 6.00222200  | -1.20179500 | -1.17444400 |
| C | 4.66628300  | -0.79932000 | -1.22612600 |
| C | 3.94079500  | -0.74217000 | -2.54950800 |
| C | 4.02012100  | -0.12850900 | 2.49314500  |
| C | 8.16484000  | -1.65606600 | 0.05472600  |
| H | 3.88446900  | 2.50974400  | 0.55712400  |
| H | 2.54729800  | 4.59103500  | 0.97081200  |
| H | 0.13047300  | 4.58285400  | 0.72145300  |
| H | -1.22659000 | 4.68395300  | -0.68836700 |
| H | -3.58723500 | 5.23221500  | -0.98017700 |
| H | -5.31164400 | 3.43369000  | -0.61682700 |
| H | -4.58984500 | 1.15951100  | -0.16782500 |
| H | -1.98099200 | -2.55172600 | -0.42273900 |
| H | 0.03996200  | -3.88846500 | -0.63791300 |

---

|   |             |             |             |
|---|-------------|-------------|-------------|
| H | 2.30587500  | -2.82518100 | -0.49785400 |
| H | -5.82380100 | -2.43654600 | -1.68207300 |
| H | -5.28953600 | -2.19593900 | 2.56419900  |
| H | -6.56726000 | -4.39355200 | 0.69045000  |
| H | -7.39022300 | -3.13137100 | 1.61072500  |
| H | -7.60646900 | -3.23676200 | -0.14590400 |
| H | -2.05139400 | -0.92246700 | 2.56312200  |
| H | -3.08682400 | 0.49940800  | 2.61087100  |
| H | -3.54501200 | -0.95369100 | 3.52006500  |
| H | -4.39354200 | -1.32839500 | -3.17062100 |
| H | -3.74661400 | 0.20986700  | -2.56860600 |
| H | -2.70915900 | -1.21127000 | -2.62776200 |
| H | 6.57718400  | -0.93440600 | 2.15055400  |
| H | 6.50284100  | -1.48174700 | -2.09903200 |
| H | 3.13832600  | -1.48644300 | -2.60452500 |
| H | 3.47095800  | 0.23592700  | -2.70230200 |
| H | 4.62938000  | -0.92536300 | -3.37968600 |
| H | 3.78240200  | 0.93920800  | 2.55701600  |
| H | 3.07047300  | -0.66631200 | 2.59045600  |
| H | 4.64954500  | -0.38555700 | 3.35027400  |
| H | 8.43588600  | -2.10847700 | 1.01433900  |
| H | 8.82259100  | -0.78936400 | -0.09411200 |
| H | 8.39315800  | -2.37619400 | -0.73805700 |

Singlet Closed Shell of 2 (RB3LYP/6-31G(d) (D3BJ))

|   |             |             |             |
|---|-------------|-------------|-------------|
| C | -2.17333200 | 1.11065900  | -0.06164600 |
| C | -2.87512700 | 2.34330100  | -0.10988000 |
| C | -2.15630300 | 3.49676200  | -0.13237400 |
| C | -0.71641500 | 3.52305400  | -0.12426300 |
| C | 0.06089900  | 2.32718500  | -0.09374400 |
| C | -0.69722300 | 1.09867100  | -0.05786300 |
| C | 1.50720600  | 2.40026200  | -0.10685400 |
| C | 2.08218900  | 3.73032600  | -0.15362600 |
| C | 3.47788900  | 3.94254100  | -0.18825800 |
| C | 4.34971500  | 2.88454200  | -0.18137100 |
| C | 3.83780600  | 1.59140800  | -0.12688300 |
| C | 2.46191000  | 1.27874700  | -0.08101100 |
| C | -0.30125900 | -0.23080800 | -0.01044500 |
| C | 0.98874300  | -0.85060000 | 0.03160400  |
| C | 0.99836700  | -2.29874700 | 0.11306800  |
| C | -0.15416900 | -3.03869800 | 0.14798100  |
| C | -1.43310400 | -2.41727100 | 0.10424400  |
| C | -1.51689400 | -1.05031400 | 0.01680300  |
| C | 2.20430400  | -0.16567700 | -0.00133900 |
| C | -2.66464400 | -0.18781500 | -0.02065800 |
| C | -4.07855100 | -0.61559000 | 0.00156700  |
| C | 3.42490500  | -1.04799800 | 0.05482800  |
| C | -4.86864400 | -0.39731900 | 1.15111100  |
| C | -6.20209200 | -0.81414000 | 1.15471800  |

---

|   |             |             |             |
|---|-------------|-------------|-------------|
| C | -6.78011600 | -1.44492900 | 0.05051300  |
| C | -5.98377700 | -1.65776100 | -1.07707200 |
| C | -4.64758900 | -1.25206500 | -1.12250400 |
| C | 3.97654000  | -1.55616600 | -1.13534800 |
| C | 5.09005100  | -2.39653000 | -1.05768100 |
| C | 5.66753300  | -2.74368500 | 0.16641500  |
| C | 5.09636100  | -2.23052600 | 1.33394000  |
| C | 3.98376700  | -1.38625400 | 1.30077600  |
| C | -3.83563000 | -1.47507500 | -2.37647900 |
| C | -4.28045300 | 0.25660100  | 2.37866300  |
| C | 3.38458700  | -0.85680700 | 2.58045200  |
| C | 3.37008000  | -1.20877600 | -2.47281300 |
| C | -8.23180000 | -1.85837700 | 0.06511300  |
| C | 6.88987500  | -3.62681700 | 0.22470600  |
| C | -0.09163000 | 4.79151500  | -0.15790700 |
| C | 1.26328100  | 4.89273100  | -0.17223700 |
| H | -3.96092400 | 2.34540000  | -0.13175200 |
| H | -2.66382500 | 4.45745600  | -0.16599200 |
| H | 3.83932500  | 4.96654400  | -0.22413000 |
| H | 5.42405800  | 3.03844000  | -0.21371200 |
| H | 4.54858200  | 0.78053800  | -0.11565400 |
| H | 1.94944600  | -2.81047800 | 0.14840300  |
| H | -0.09146100 | -4.12098500 | 0.21277900  |
| H | -2.33768900 | -3.01885500 | 0.14444300  |
| H | -6.80270200 | -0.64969000 | 2.04732200  |
| H | -6.41646400 | -2.14405100 | -1.94934800 |
| H | 5.51455100  | -2.79128900 | -1.97826100 |
| H | 5.52537700  | -2.49522300 | 2.29799600  |
| H | -4.47988400 | -1.76634200 | -3.21188500 |
| H | -3.28933600 | -0.56822700 | -2.65682700 |
| H | -3.08388100 | -2.26200900 | -2.24360700 |
| H | -3.32963300 | -0.21025900 | 2.65755900  |
| H | -4.06681900 | 1.31876800  | 2.21157600  |
| H | -4.96718000 | 0.18101000  | 3.22751800  |
| H | 2.35960900  | -1.21994000 | 2.71932400  |
| H | 3.97520500  | -1.16671800 | 3.44721400  |
| H | 3.33626600  | 0.23804600  | 2.57349500  |
| H | 3.29727300  | -0.12352600 | -2.60671600 |
| H | 3.97033000  | -1.61431500 | -3.29222200 |
| H | 2.35397500  | -1.60986600 | -2.56473900 |
| H | -8.56539500 | -2.11215500 | 1.07701700  |
| H | -8.88011600 | -1.04913500 | -0.29698800 |
| H | -8.40752300 | -2.72689500 | -0.57853700 |
| H | 7.81139400  | -3.03063700 | 0.19222800  |
| H | 6.91550100  | -4.21380200 | 1.14869100  |
| H | 6.92225000  | -4.32130000 | -0.62115200 |
| H | -0.71662800 | 5.68038400  | -0.17645000 |
| H | 1.75275800  | 5.86176000  | -0.20307700 |



Singlet Biradical Open Shell of 2 (UB3LYP/6-31G(d) (D3BJ) nosymm guess=(mix,always))

|   |             |             |             |
|---|-------------|-------------|-------------|
| C | -2.16414500 | 1.11217000  | -0.01352500 |
| C | -2.88338800 | 2.33184000  | -0.02729900 |
| C | -2.17521000 | 3.49488600  | -0.02387100 |
| C | -0.74051100 | 3.52263900  | -0.01808200 |
| C | 0.04502500  | 2.32479400  | -0.01862300 |
| C | -0.70564300 | 1.10454200  | -0.01575400 |
| C | 1.49910900  | 2.40802300  | -0.02527300 |
| C | 2.06224600  | 3.73746900  | -0.03197200 |
| C | 3.45727100  | 3.96753500  | -0.04688200 |
| C | 4.33584300  | 2.91509400  | -0.05674400 |
| C | 3.83211200  | 1.61800100  | -0.04574800 |
| C | 2.45568500  | 1.29124700  | -0.02647800 |
| C | -0.29875700 | -0.24997700 | -0.01282300 |
| C | 0.98284200  | -0.85298400 | 0.00179200  |
| C | 1.00032600  | -2.30041200 | 0.02644300  |
| C | -0.14860100 | -3.05370300 | 0.04037300  |
| C | -1.42535200 | -2.44018100 | 0.02751000  |
| C | -1.49975500 | -1.06533700 | -0.00893600 |
| C | 2.20931300  | -0.15196200 | -0.00491700 |
| C | -2.65144400 | -0.20088800 | -0.01208000 |
| C | -4.06322900 | -0.62964200 | -0.00172700 |
| C | 3.42938400  | -1.03419600 | 0.01331600  |
| C | -4.84851500 | -0.45329300 | 1.15798700  |
| C | -6.18105800 | -0.87217500 | 1.14944100  |
| C | -6.76173900 | -1.46052700 | 0.02333700  |
| C | -5.96884500 | -1.63006000 | -1.11419600 |
| C | -4.63272200 | -1.22417800 | -1.14820700 |
| C | 3.98407400  | -1.48902700 | -1.19722800 |
| C | 5.09469500  | -2.33583800 | -1.15731700 |
| C | 5.66830200  | -2.74168600 | 0.05051800  |
| C | 5.09615400  | -2.28158500 | 1.23946900  |
| C | 3.98588000  | -1.43346300 | 1.24246100  |
| C | -3.82272500 | -1.39818400 | -2.41118200 |
| C | -4.25550100 | 0.15360500  | 2.40729700  |
| C | 3.38608300  | -0.95955400 | 2.54342500  |
| C | 3.38256500  | -1.07454200 | -2.51761500 |
| C | -8.21298500 | -1.87516100 | 0.02627400  |
| C | 6.88768900  | -3.63075900 | 0.06996400  |
| C | -0.11824800 | 4.79452800  | -0.01897500 |
| C | 1.23511300  | 4.89732100  | -0.02587800 |
| H | -3.96912800 | 2.32037500  | -0.04530700 |
| H | -2.68882900 | 4.45256700  | -0.03191400 |
| H | 3.80925800  | 4.99524400  | -0.05196600 |
| H | 5.40968500  | 3.07605700  | -0.07112000 |
| H | 4.54794800  | 0.81109700  | -0.05053800 |
| H | 1.95494400  | -2.80718000 | 0.03696200  |
| H | -0.07509100 | -4.13704200 | 0.06375700  |

---

|   |             |             |             |
|---|-------------|-------------|-------------|
| H | -2.33148600 | -3.03957700 | 0.04964100  |
| H | -6.77881600 | -0.74286600 | 2.04954700  |
| H | -6.40394700 | -2.08277900 | -2.00301800 |
| H | 5.52011100  | -2.68881300 | -2.09441700 |
| H | 5.52247700  | -2.59217500 | 2.19105300  |
| H | -4.46531400 | -1.68058000 | -3.25067800 |
| H | -3.29719600 | -0.47327000 | -2.67243600 |
| H | -3.05444800 | -2.17212400 | -2.30095500 |
| H | -3.30815800 | -0.32930800 | 2.67071800  |
| H | -4.03550900 | 1.21945700  | 2.27695400  |
| H | -4.94232800 | 0.05253100  | 3.25319400  |
| H | 2.35355500  | -1.31031400 | 2.65608900  |
| H | 3.96407300  | -1.32350300 | 3.39779100  |
| H | 3.35681500  | 0.13503200  | 2.59114600  |
| H | 3.34151100  | 0.01680900  | -2.60969100 |
| H | 3.96660900  | -1.46653600 | -3.35530100 |
| H | 2.35418800  | -1.44083600 | -2.61840700 |
| H | -8.54459300 | -2.16368900 | 1.02936700  |
| H | -8.86172600 | -1.05394600 | -0.30673300 |
| H | -8.38929300 | -2.72089400 | -0.64676300 |
| H | 7.81157000  | -3.03735900 | 0.05904200  |
| H | 6.91347900  | -4.25476200 | 0.96940900  |
| H | 6.91552600  | -4.29076900 | -0.80332100 |
| H | -0.74538300 | 5.68195000  | -0.01651700 |
| H | 1.72125900  | 5.86866300  | -0.02904200 |

Triplet State of 2 (UB3LYP/6-31G(d) (D3BJ)

|   |             |             |             |
|---|-------------|-------------|-------------|
| C | -2.14269600 | 1.12267500  | -0.04604000 |
| C | -2.88014200 | 2.31506000  | -0.10845500 |
| C | -2.18131900 | 3.49610400  | -0.15108600 |
| C | -0.76310600 | 3.52641600  | -0.14170000 |
| C | 0.03256600  | 2.31564700  | -0.09104700 |
| C | -0.71299000 | 1.11907600  | -0.04543900 |
| C | 1.49364400  | 2.41045400  | -0.09016500 |
| C | 2.04643500  | 3.73755000  | -0.13905200 |
| C | 3.43552100  | 3.98248100  | -0.14205400 |
| C | 4.32101200  | 2.93001100  | -0.09616400 |
| C | 3.82534500  | 1.63595800  | -0.04803500 |
| C | 2.44284600  | 1.29577200  | -0.04244400 |
| C | -0.30423900 | -0.28058200 | 0.00113500  |
| C | 0.97113800  | -0.86826500 | 0.02995600  |
| C | 0.99189100  | -2.30359200 | 0.08342900  |
| C | -0.16400500 | -3.07561800 | 0.11414000  |
| C | -1.42673900 | -2.48157000 | 0.08964500  |
| C | -1.48777000 | -1.08414800 | 0.02406700  |
| C | 2.20836600  | -0.13661000 | 0.01085800  |
| C | -2.62907400 | -0.22238600 | -0.00361000 |
| C | -4.04290800 | -0.63754900 | 0.01058500  |

---

|   |             |             |             |
|---|-------------|-------------|-------------|
| C | 3.42550200  | -1.02022200 | 0.05215600  |
| C | -4.82771800 | -0.42840400 | 1.16439500  |
| C | -6.16391100 | -0.83444600 | 1.15808400  |
| C | -6.74636300 | -1.43603500 | 0.03974800  |
| C | -5.95112100 | -1.63644800 | -1.09140600 |
| C | -4.60994700 | -1.24920200 | -1.12751700 |
| C | 3.98663000  | -1.50029200 | -1.14581600 |
| C | 5.08963000  | -2.35591000 | -1.08576700 |
| C | 5.65036900  | -2.74868300 | 0.13246300  |
| C | 5.07281100  | -2.26627800 | 1.30993200  |
| C | 3.96941300  | -1.40928100 | 1.29037400  |
| C | -3.79189500 | -1.46059000 | -2.37935500 |
| C | -4.22850300 | 0.19153700  | 2.40450900  |
| C | 3.36244900  | -0.90957200 | 2.57819000  |
| C | 3.39848800  | -1.09806300 | -2.47583100 |
| C | -8.20189500 | -1.83458100 | 0.04396700  |
| C | 6.86178200  | -3.64806200 | 0.17458700  |
| C | -0.13757900 | 4.80036600  | -0.18882000 |
| C | 1.21330700  | 4.89854700  | -0.18734000 |
| H | -3.96562100 | 2.28850900  | -0.12618800 |
| H | -2.70593100 | 4.44634000  | -0.19750600 |
| H | 3.78238500  | 5.01096300  | -0.18050600 |
| H | 5.39429700  | 3.09632200  | -0.09701200 |
| H | 4.54397900  | 0.83168300  | -0.01254400 |
| H | 1.94773200  | -2.80825000 | 0.10471800  |
| H | -0.07271400 | -4.15707900 | 0.16077400  |
| H | -2.33776900 | -3.07112200 | 0.12545800  |
| H | -6.76298400 | -0.68385600 | 2.05378000  |
| H | -6.38727400 | -2.10222100 | -1.97271000 |
| H | 5.51914700  | -2.72687500 | -2.01417800 |
| H | 5.48902800  | -2.56662600 | 2.26940700  |
| H | -4.42408300 | -1.80012300 | -3.20517200 |
| H | -3.29223900 | -0.53516700 | -2.68698000 |
| H | -3.00318600 | -2.20608200 | -2.22780400 |
| H | -3.29775600 | -0.31167500 | 2.68916600  |
| H | -3.97884700 | 1.24755100  | 2.25119500  |
| H | -4.92430700 | 0.12855000  | 3.24642400  |
| H | 2.31616400  | -1.22365600 | 2.67070100  |
| H | 3.91071700  | -1.28982000 | 3.44523000  |
| H | 3.37007500  | 0.18573600  | 2.62131200  |
| H | 3.41011200  | -0.00915100 | -2.60143200 |
| H | 3.95721900  | -1.54379200 | -3.30413800 |
| H | 2.35256000  | -1.41596500 | -2.55870800 |
| H | -8.54378700 | -2.08985200 | 1.05243500  |
| H | -8.83821400 | -1.01604200 | -0.31805200 |
| H | -8.38255100 | -2.69745600 | -0.60561200 |
| H | 7.79151700  | -3.06384400 | 0.15759500  |
| H | 6.87733700  | -4.25586600 | 1.08537800  |
| H | 6.88807800  | -4.32441000 | -0.68628100 |

---

|   |             |            |             |
|---|-------------|------------|-------------|
| H | -0.76471200 | 5.68678200 | -0.22619000 |
| H | 1.70028800  | 5.86891900 | -0.22303600 |

Singlet Closed Shell of 3 (RB3LYP/6-31G(d) (D3BJ))

|   |             |             |             |
|---|-------------|-------------|-------------|
| C | -3.98538800 | 1.71774400  | -0.43418000 |
| C | -2.67085200 | 1.26738700  | -0.19954800 |
| C | -1.61303300 | 2.27953900  | -0.05617600 |
| C | -2.06892900 | 3.64911100  | 0.00669500  |
| C | -3.42534700 | 4.01044100  | -0.16915700 |
| C | -4.37107300 | 3.05718900  | -0.43459900 |
| C | -0.17077300 | 2.06942800  | -0.01025300 |
| C | 0.71421800  | 3.18063900  | 0.07390700  |
| C | 0.18489400  | 4.47982200  | 0.26308300  |
| C | -1.15367200 | 4.70734600  | 0.23110400  |
| C | 0.44917300  | 0.76145800  | -0.05172400 |
| C | 1.91859800  | 0.60413400  | -0.06509000 |
| C | 2.78037400  | 1.75938100  | -0.12476700 |
| C | 2.17583700  | 3.03968600  | -0.04872400 |
| C | 4.17931300  | 1.64976400  | -0.26891200 |
| C | 4.98393800  | 2.77441300  | -0.33098900 |
| C | 4.39713900  | 4.04304500  | -0.26786400 |
| C | 3.02250200  | 4.16620800  | -0.13726400 |
| C | -0.10435400 | -0.51160600 | -0.00329700 |
| C | 0.99974300  | -1.46500700 | 0.03170500  |
| C | 2.24475100  | -0.74107000 | -0.01939800 |
| C | -1.45357200 | -0.99187300 | 0.05249600  |
| C | -1.61881200 | -2.42897200 | 0.20020200  |
| C | -0.55995400 | -3.29173500 | 0.23851700  |
| C | 0.77966300  | -2.81036400 | 0.14930900  |
| C | 3.56041700  | -1.41889100 | 0.02766100  |
| C | 4.08771900  | -2.01644900 | -1.13455300 |
| C | 5.31782200  | -2.67631100 | -1.06499500 |
| C | 6.03782900  | -2.76438700 | 0.12871100  |
| C | 5.49978300  | -2.16365100 | 1.27045000  |
| C | 4.27389500  | -1.49577400 | 1.24152800  |
| C | 3.34846200  | -1.91373300 | -2.44676800 |
| C | 3.73224800  | -0.83558000 | 2.48500900  |
| C | 7.34954500  | -3.50864400 | 0.19079000  |
| C | -2.58485000 | -0.19301300 | -0.05607800 |
| C | -3.89968100 | -0.92489800 | 0.00248200  |
| C | -4.57336800 | -1.04589200 | 1.23205500  |
| C | -5.78172200 | -1.74538500 | 1.27331800  |
| C | -6.33902000 | -2.32332800 | 0.12943400  |
| C | -5.65357200 | -2.18429700 | -1.08002800 |
| C | -4.43885400 | -1.49860600 | -1.16368200 |
| C | -3.71942800 | -1.37441600 | -2.48489900 |
| C | -3.99947800 | -0.43385000 | 2.48606900  |
| C | -7.63188400 | -3.09822200 | 0.20406900  |

---

|   |             |             |             |
|---|-------------|-------------|-------------|
| H | -4.75781800 | 0.98120600  | -0.59114200 |
| H | -3.68480300 | 5.06413100  | -0.11645200 |
| H | -5.40852300 | 3.32179500  | -0.61521900 |
| H | 0.84860500  | 5.31572000  | 0.43718200  |
| H | -1.54794000 | 5.71289400  | 0.34603300  |
| H | 4.62598700  | 0.66716700  | -0.34179800 |
| H | 6.05919400  | 2.66811500  | -0.44225200 |
| H | 5.01141700  | 4.93668300  | -0.33384600 |
| H | 2.60705600  | 5.16557100  | -0.13195300 |
| H | -2.62166800 | -2.82521500 | 0.27545600  |
| H | -0.73820000 | -4.35764000 | 0.34453000  |
| H | 1.61868700  | -3.50024100 | 0.18915200  |
| H | 5.72599200  | -3.12705900 | -1.96741500 |
| H | 6.04913400  | -2.21598400 | 2.20838000  |
| H | 3.13094100  | -0.86848700 | -2.69415900 |
| H | 3.93440500  | -2.34710800 | -3.26300700 |
| H | 2.38338600  | -2.43173000 | -2.40734500 |
| H | 3.72077400  | 0.25562700  | 2.37663400  |
| H | 2.69989500  | -1.14389800 | 2.68259300  |
| H | 4.34211600  | -1.08344300 | 3.35914500  |
| H | 8.02777500  | -3.06382400 | 0.92682300  |
| H | 7.19880600  | -4.55712800 | 0.48085700  |
| H | 7.85518500  | -3.50976000 | -0.78052100 |
| H | -6.30113400 | -1.83949500 | 2.22461200  |
| H | -6.07351800 | -2.62047500 | -1.98389300 |
| H | -4.34306400 | -1.74032100 | -3.30565400 |
| H | -3.45017400 | -0.33359700 | -2.69668600 |
| H | -2.78671400 | -1.95074600 | -2.48526200 |
| H | -3.89262900 | 0.65222900  | 2.38386300  |
| H | -4.64143800 | -0.63338500 | 3.34877500  |
| H | -3.00177900 | -0.83234400 | 2.70308100  |
| H | -7.44751600 | -4.15569400 | 0.43537100  |
| H | -8.28937200 | -2.70500600 | 0.98647200  |
| H | -8.17453900 | -3.06324300 | -0.74625400 |

Singlet Biradical Open Shell of 3 (UB3LYP/6-31G(d) (D3BJ) nosymm guess=(mix,always))

|   |             |            |             |
|---|-------------|------------|-------------|
| C | -3.99667800 | 1.73777500 | -0.29105200 |
| C | -2.67567600 | 1.27463400 | -0.11356400 |
| C | -1.61364700 | 2.28056900 | 0.04579700  |
| C | -2.06450500 | 3.64706500 | 0.16485000  |
| C | -3.42456300 | 4.01815600 | 0.04218700  |
| C | -4.38024000 | 3.07562200 | -0.22598200 |
| C | -0.16952100 | 2.06691500 | 0.05985200  |
| C | 0.71922700  | 3.17648100 | 0.15805200  |
| C | 0.19605500  | 4.47036800 | 0.39256000  |
| C | -1.14268800 | 4.69802300 | 0.39794900  |
| C | 0.45002700  | 0.76329500 | -0.01686500 |
| C | 1.91388500  | 0.60576700 | -0.03461600 |

---

|   |             |             |             |
|---|-------------|-------------|-------------|
| C | 2.77981800  | 1.75805300  | -0.07971100 |
| C | 2.17769600  | 3.03798000  | 0.01449100  |
| C | 4.17801800  | 1.64897900  | -0.23245300 |
| C | 4.98214900  | 2.77411100  | -0.28952100 |
| C | 4.39667900  | 4.04303900  | -0.21367200 |
| C | 3.02346700  | 4.16573500  | -0.07199000 |
| C | -0.10763100 | -0.51879400 | -0.00374400 |
| C | 0.99280500  | -1.46940200 | 0.00770500  |
| C | 2.23867200  | -0.74324300 | -0.01990900 |
| C | -1.45291200 | -0.99649000 | 0.02425900  |
| C | -1.62059400 | -2.43619000 | 0.10903700  |
| C | -0.56194300 | -3.30304900 | 0.13007300  |
| C | 0.77590900  | -2.82083200 | 0.07565800  |
| C | 3.55394200  | -1.42183400 | 0.00923100  |
| C | 4.07867900  | -1.99267200 | -1.16746100 |
| C | 5.30880400  | -2.65395000 | -1.11482200 |
| C | 6.03063300  | -2.76953500 | 0.07544400  |
| C | 5.49470500  | -2.19483200 | 1.23152500  |
| C | 4.26916900  | -1.52595100 | 1.21996100  |
| C | 3.33771700  | -1.85873800 | -2.47589400 |
| C | 3.72946400  | -0.89377900 | 2.47877800  |
| C | 7.34219500  | -3.51533900 | 0.11842800  |
| C | -2.58915300 | -0.18844600 | -0.05144500 |
| C | -3.90044100 | -0.92884500 | -0.04767100 |
| C | -4.57703500 | -1.14377100 | 1.16737700  |
| C | -5.78060300 | -1.85267000 | 1.15406300  |
| C | -6.32970800 | -2.35125800 | -0.03040200 |
| C | -5.64130000 | -2.12093200 | -1.22416600 |
| C | -4.43179400 | -1.42173100 | -1.25366900 |
| C | -3.70869300 | -1.19676300 | -2.55928200 |
| C | -4.01046300 | -0.62001200 | 2.46396000  |
| C | -7.61678900 | -3.13920000 | -0.01642200 |
| H | -4.77445000 | 1.00934600  | -0.45851300 |
| H | -3.67894200 | 5.06990600  | 0.13871800  |
| H | -5.42251400 | 3.34706700  | -0.36378500 |
| H | 0.86469100  | 5.29997000  | 0.57756200  |
| H | -1.53353300 | 5.69935700  | 0.55405200  |
| H | 4.62445200  | 0.66731500  | -0.31735200 |
| H | 6.05667800  | 2.66834100  | -0.40823100 |
| H | 5.01117700  | 4.93658200  | -0.27836800 |
| H | 2.60710200  | 5.16471000  | -0.05767300 |
| H | -2.62424200 | -2.83480000 | 0.15447100  |
| H | -0.74389000 | -4.37177700 | 0.19291700  |
| H | 1.61605500  | -3.50989200 | 0.09774000  |
| H | 5.71550900  | -3.08374200 | -2.02803100 |
| H | 6.04552900  | -2.26870300 | 2.16711000  |
| H | 3.12055100  | -0.80780400 | -2.69842800 |
| H | 3.92253700  | -2.27278400 | -3.30285100 |
| H | 2.37259000  | -2.37731600 | -2.44756800 |

---

|   |             |             |             |
|---|-------------|-------------|-------------|
| H | 3.71716000  | 0.19955100  | 2.39463400  |
| H | 2.69774500  | -1.20725300 | 2.67173200  |
| H | 4.34114000  | -1.16052800 | 3.34601700  |
| H | 8.02252200  | -3.08628300 | 0.86183800  |
| H | 7.19165600  | -4.56956500 | 0.38691900  |
| H | 7.84523000  | -3.49630900 | -0.85402500 |
| H | -6.30250700 | -2.01835100 | 2.09418600  |
| H | -6.05465700 | -2.49479900 | -2.15850300 |
| H | -4.31602000 | -1.53003000 | -3.40577700 |
| H | -3.46932900 | -0.13738800 | -2.70512600 |
| H | -2.75904300 | -1.74400200 | -2.58674800 |
| H | -3.89827100 | 0.46993300  | 2.43586800  |
| H | -4.65954700 | -0.87450100 | 3.30670100  |
| H | -3.01605900 | -1.03703500 | 2.66074700  |
| H | -7.42505800 | -4.20924800 | 0.13849700  |
| H | -8.27961600 | -2.80847500 | 0.79003800  |
| H | -8.15694400 | -3.03969800 | -0.96361400 |

Triplet State of **3** (UB3LYP/6-31G(d) (D3BJ))

|   |             |             |             |
|---|-------------|-------------|-------------|
| C | -3.99701800 | 1.80695600  | 0.00425600  |
| C | -2.66033900 | 1.31097800  | 0.05145000  |
| C | -1.58647600 | 2.31109200  | 0.11125100  |
| C | -2.00393000 | 3.68327700  | 0.23318700  |
| C | -3.35863300 | 4.08149300  | 0.25393600  |
| C | -4.35290300 | 3.14214300  | 0.10856800  |
| C | -0.14372800 | 2.07090200  | 0.02245200  |
| C | 0.76937200  | 3.18992900  | -0.01471500 |
| C | 0.27827200  | 4.49910700  | 0.19531600  |
| C | -1.05356600 | 4.73382000  | 0.32538900  |
| C | 0.46720900  | 0.78788000  | -0.00532300 |
| C | 1.88406200  | 0.61417400  | -0.07340100 |
| C | 2.77292600  | 1.72233500  | -0.26157800 |
| C | 2.19850700  | 3.02217600  | -0.24583800 |
| C | 4.16208900  | 1.57447200  | -0.48302800 |
| C | 4.97058100  | 2.67525900  | -0.68568600 |
| C | 4.40976400  | 3.96299500  | -0.69139300 |
| C | 3.05444200  | 4.12656300  | -0.48089400 |
| C | -0.11735800 | -0.54836400 | 0.11352000  |
| C | 0.95561600  | -1.48354900 | 0.15501900  |
| C | 2.19508400  | -0.76787000 | 0.03995100  |
| C | -1.44813500 | -0.99114000 | 0.16024200  |
| C | -1.63591500 | -2.40823400 | 0.28852300  |
| C | -0.57863500 | -3.30567200 | 0.35788600  |
| C | 0.74234800  | -2.85798800 | 0.28898000  |
| C | 3.51061600  | -1.43910800 | 0.08815200  |
| C | 3.98476200  | -2.13672500 | -1.04048700 |
| C | 5.22067800  | -2.78413000 | -0.96650500 |
| C | 5.99170800  | -2.76731000 | 0.19836000  |

---

|   |             |             |             |
|---|-------------|-------------|-------------|
| C | 5.50058300  | -2.07092900 | 1.30647600  |
| C | 4.27314200  | -1.40708000 | 1.27334500  |
| C | 3.18681100  | -2.15037000 | -2.32191100 |
| C | 3.77891300  | -0.64506500 | 2.47794200  |
| C | 7.30791200  | -3.50244300 | 0.26775600  |
| C | -2.59657800 | -0.13098200 | 0.05822700  |
| C | -3.89968300 | -0.87786300 | -0.02945000 |
| C | -4.61116400 | -1.20587700 | 1.14013800  |
| C | -5.79917600 | -1.93289300 | 1.03204200  |
| C | -6.29796900 | -2.34744700 | -0.20606400 |
| C | -5.57588700 | -2.01067900 | -1.35367600 |
| C | -4.38235900 | -1.28692200 | -1.28600600 |
| C | -3.62174500 | -0.94188100 | -2.54275300 |
| C | -4.09570200 | -0.77332600 | 2.49051100  |
| C | -7.56644200 | -3.16031000 | -0.29798000 |
| H | -4.79567800 | 1.08813000  | -0.09553200 |
| H | -3.58703800 | 5.13814100  | 0.35733800  |
| H | -5.40077100 | 3.42623300  | 0.08343100  |
| H | 0.96632400  | 5.32959300  | 0.27474500  |
| H | -1.42113200 | 5.74410000  | 0.48082400  |
| H | 4.59193200  | 0.58250500  | -0.50854000 |
| H | 6.03459600  | 2.54070900  | -0.85830900 |
| H | 5.03519800  | 4.83170500  | -0.87552500 |
| H | 2.64924500  | 5.12900500  | -0.53411200 |
| H | -2.64438600 | -2.79488100 | 0.33369400  |
| H | -0.79086000 | -4.36594400 | 0.46156100  |
| H | 1.58356500  | -3.54279100 | 0.33470100  |
| H | 5.59161700  | -3.31075100 | -1.84333700 |
| H | 6.08861500  | -2.04319200 | 2.22152300  |
| H | 2.95431600  | -1.13155600 | -2.65307900 |
| H | 3.73831300  | -2.65311900 | -3.12186900 |
| H | 2.22802200  | -2.66509300 | -2.19245500 |
| H | 3.77099600  | 0.43438200  | 2.28457100  |
| H | 2.75305600  | -0.92941200 | 2.73665800  |
| H | 4.41750300  | -0.82819800 | 3.34718700  |
| H | 8.01208900  | -2.99996900 | 0.93933200  |
| H | 7.17181600  | -4.52450500 | 0.64559300  |
| H | 7.77517800  | -3.58030600 | -0.71942400 |
| H | -6.34804900 | -2.18189600 | 1.93801300  |
| H | -5.94931800 | -2.31974900 | -2.32785200 |
| H | -4.14247100 | -1.31063600 | -3.43145000 |
| H | -3.49393900 | 0.14196700  | -2.64549500 |
| H | -2.61681300 | -1.37980600 | -2.52917400 |
| H | -4.02315800 | 0.31858500  | 2.55635800  |
| H | -4.75366300 | -1.12078800 | 3.29252900  |
| H | -3.09087000 | -1.17028500 | 2.67615700  |
| H | -7.35494200 | -4.23580100 | -0.23063100 |
| H | -8.25896100 | -2.91470400 | 0.51405000  |
| H | -8.08265300 | -2.99005300 | -1.24858600 |



## 8. References

- [1] J. I. Urgel, M. D. Giovannantonio, K. Eimre, T. G. Lohr, J. Liu, S. Mishra, Q. Sun, A. Kinikar, R. Widmer, S. Stolz, M. Bommert, R. Berger, P. Ruffieux, C. A. Pignedoli, K. Müllen, X. Feng, *Angew. Chem., Int. Ed.* **2020**, *59*, 13281-13287.
- [2] Y.-K. Zhang, J. J. Plattner, E. E. Easom, D. Waterson, M. Ge, Z. Li, L. Li, Y. Jian, *Tetrahedron Lett.* **2011**, *52*, 3909-3911.
- [3] F. Lombardi, J. Ma, D. I. Alexandropoulos, H. Komber, J. Liu, W. K. Myers, X. Feng, L. Bogani, *Chem* **2021**, *7*, 1363-1378.
- [4] J. Liu, B.-W. Li, Y.-Z. Tan, A. Giannakopoulos, C. Sanchez-Sanchez, D. Beljonne, P. Ruffieux, R. Fasel, X. Feng, K. Müllen, *J. Am. Chem. Soc.* **2015**, *137*, 6097-6103.
- [5] N. GraGallagher, H. Zhang, T. Junghoefer, E. Giangrisostomi, R. Ovsyannikov, M. Pink, S. Rajca, M. B. Casu, A. Rajca, *J. Am. Chem. Soc.* **2019**, *141*, 4764-4774.
- [6] G. Grampp, S. Landgraf, K. Rasmussen, *J. Chem. Soc., Perkin Trans. 2* **1999**, 1897-1899.
- [7] Gaussian 16, Revision C.01, M. J. Frisch, G. W. Trucks, H. B. Schlegel, G. E. Scuseria, M. A. Robb, J. R. Cheeseman, G. Scalmani, V. Barone, G. A. Petersson, H. Nakatsuji, X. Li, M. Caricato, A. V. Marenich, J. Bloino, B. G. Janesko, R. Gomperts, B. Mennucci, H. P. Hratchian, J. V. Ortiz, A. F. Izmaylov, J. L. Sonnenberg, D. Williams-Young, F. Ding, F. Lipparini, F. Egidi, J. Goings, B. Peng, A. Petrone, T. Henderson, D. Ranasinghe, V. G. Zakrzewski, J. Gao, N. Rega, G. Zheng, W. Liang, M. Hada, M. Ehara, K. Toyota, R. Fukuda, J. Hasegawa, M. Ishida, T. Nakajima, Y. Honda, O. Kitao, H. Nakai, T. Vreven, K. Throssell, J. A. Montgomery, Jr., J. E. Peralta, F. Ogliaro, M. J. Bearpark, J. J. Heyd, E. N. Brothers, K. N. Kudin, V. N. Staroverov, T. A. Keith, R. Kobayashi, J. Normand, K. Raghavachari, A. P. Rendell, J. C. Burant, S. S. Iyengar, J. Tomasi, M. Cossi, J. M. Millam, M. Klene, C. Adamo, R. Cammi, J. W. Ochterski, R. L. Martin, K. Morokuma, O. Farkas, J. B. Foresman, and D. J. Fox, Gaussian, Inc., Wallingford CT, 2016.
- [8] (a) K. Yamaguchi, F. Jensen, A. Dorigo, K. N. Houk, *Chem. Phys. Lett.* **1988**, *49*, 537-542; (b) K. Yamaguchi, Y. Takahara, T. Fueno, K. N. Houk, *Theor. Chim. Acta* **1988**, *73*, 337-364.
- [9] R. Herges, D. Geuenich, *J. Phys. Chem. A* **2001**, *105*, 3214-3220.
- [10] P. V. R. Schleyer, C. Maerker, A. Dransfeld, H. Jiao, N. J. van Eikema Hommes, *J. Am. Chem. Soc.* **1996**, *118*, 6317-6318.
